# Supplementary material for: National, Regional, and Global Cardiomyopathy Burden from 1990 – 2019
Source: Research Square preprint supplement (doi:10.21203/rs.3.rs-1310761/v1), 2022-02-17
Supplement: Supplementary file 1 [file a8aaf94cea1b6ad58deaaf29.pdf]

**Table S1.** Age-standardized prevalence, death, DALYs rates of the cardiomyopathy, and their percentage changes with 95% CIs from 1990 to 2019 at national level, both sexes.

| Countries           | Prevalence             |                        |                     | Deaths              |                     |                     | DALYs                  |                        |                     |
|---------------------|------------------------|------------------------|---------------------|---------------------|---------------------|---------------------|------------------------|------------------------|---------------------|
|                     | 1990 age-              | 2019                   | Percentage change   | 1990 age-           | 2019                | Percentage change   | 1990 age-standardized  | 2019                   | Percentage change   |
|                     | standardized           | age-standardized       | in age-             | standardized        | age-standardized    | in age-standardized | rate per 100,000       | age-standardized       | in age-standardized |
|                     | rate per 100,000       | rate per 100,000       | standardized        | rate per 100,000    | rate per 100,000    | rates, 1990–2019    | people                 | rate per 100,000       | rates, 1990–2019    |
|                     | people                 | people                 | rates, 1990–2019    | people              | people              | (%)                 |                        | people                 | (%)                 |
|                     |                        |                        | (%)                 |                     |                     |                     |                        |                        |                     |
| Afghanistan         | 8.9 (6.7 to 11.6)      | 9.5 (7.2 to 12.1)      | 0.2 (-0.1 to 0.4)   | 3.2 (1.3 to 6.5)    | 2.5 (1.2 to 4.6)    | -0.6 (-1 to 0.2)    | 80.7 (32.7 to 183.2)   | 59.5 (28.7 to 116.5)   | -0.7 (-1.1 to 0.2)  |
| Albania             | 77.2 (55.7 to 105.4)   | 64.8 (46.8 to 89.7)    | -0.3 (-0.5 to -0.1) | 12.1 (7.8 to 14.6)  | 6.5 (4.4 to 10.6)   | -0.9 (-1.3 to -0.1) | 211.2 (151 to 252.3)   | 129.6 (87.7 to 215.1)  | -0.8 (-1.2 to 0)    |
| Algeria             | 20.9 (15.4 to 27.9)    | 21.7 (16.1 to 28.6)    | 0.1 (-0.1 to 0.3)   | 3.3 (2.3 to 5.1)    | 2.2 (1.6 to 3.4)    | -0.8 (-1.3 to -0.1) | 85.2 (57.4 to 152.8)   | 53.4 (37.5 to 82.5)    | -0.9 (-1.3 to -0.1) |
| American Samoa      | 88.9 (66 to 117.5)     | 89.6 (66 to 118.1)     | 0 (-0.2 to 0.3)     | 8.2 (6.5 to 11.4)   | 7.2 (5.6 to 9.5)    | -0.8 (-1.1 to -0.2) | 233.4 (186.1 to 319.9) | 212.1 (161.2 to 283.4) | -0.8 (-1.1 to -0.1) |
| Andorra             | 116.3 (87.4 to 150)    | 84.4 (63.3 to 109.6)   | -0.6 (-0.7 to -0.4) | 6.7 (4 to 9.9)      | 5.6 (3.7 to 7.4)    | -0.5 (-1 to 0.3)    | 132.1 (88.4 to 190.8)  | 101.4 (72.9 to 134.6)  | -0.5 (-1 to 0.2)    |
| Angola              | 200.7 (130.1 to 288.5) | 221 (143.7 to 312.1)   | 0.2 (-0.1 to 0.5)   | 9.7 (4.9 to 14.8)   | 8.6 (5 to 12.3)     | -0.5 (-1 to 0.6)    | 278.6 (141.3 to 404.3) | 236.1 (147.8 to 323.9) | -0.5 (-1.1 to 0.6)  |
| Antigua and Barbuda | 32.6 (25.3 to 41.4)    | 34.1 (25.5 to 44.8)    | 0.1 (-0.3 to 0.5)   | 4.2 (3.6 to 5.2)    | 5.1 (3.5 to 6.3)    | 1.1 (-0.3 to 2.6)   | 109.1 (95.2 to 137.7)  | 121.4 (85.6 to 148.9)  | 0.9 (-0.4 to 2.3)   |
| Argentina           | 62.6 (42.2 to 87.6)    | 81.5 (57.2 to 112.8)   | 1.3 (0.6 to 2.3)    | 14.9 (10.3 to 17.8) | 11 (8.7 to 12.3)    | -1.1 (-1.2 to -0.8) | 326.7 (256.7 to 380.1) | 217.4 (190.4 to 244.6) | -1.1 (-1.3 to -0.9) |
| Armenia             | 42 (31.5 to 54.7)      | 21.1 (15.8 to 27.8)    | -1 (-1.1 to -0.9)   | 6.8 (4.2 to 9.7)    | 3.9 (2.2 to 5.6)    | 0 (-1.1 to 1.8)     | 150.7 (116.4 to 199.9) | 78.8 (51.8 to 114.7)   | -0.1 (-1.1 to 1.1)  |
| Australia           | 164.5 (124.2 to 216.5) | 115.2 (86.5 to 151)    | -0.6 (-0.7 to -0.4) | 7.2 (4.7 to 8.3)    | 3.2 (2.6 to 4.2)    | -1 (-1.3 to -0.5)   | 175.5 (133.7 to 198.2) | 83.7 (68.1 to 110.1)   | -1 (-1.2 to -0.6)   |
| Austria             | 194.4 (145.5 to 248.9) | 133.4 (101.3 to 169.2) | -0.6 (-0.8 to -0.3) | 35.9 (7.8 to 43.5)  | 7.8 (5.4 to 9.3)    | 0.7 (-1.2 to 2.6)   | 457.2 (157.4 to 540.1) | 112.5 (93.2 to 144.3)  | 0.4 (-1.1 to 1.8)   |
| Azerbaijan          | 57.1 (43 to 73.9)      | 52.9 (39.6 to 68.5)    | -0.1 (-0.3 to 0.1)  | 14.6 (11.3 to 20.7) | 16.1 (12.1 to 23.4) | 0 (-0.6 to 0.8)     | 417.5 (306.6 to 640.4) | 408.9 (293.1 to 679)   | -0.2 (-0.7 to 0.6)  |
| Bahamas             | 41.4 (31.3 to 54.4)    | 40.6 (30.8 to 53.3)    | 0 (-0.3 to 0.2)     | 9.1 (7.6 to 11.1)   | 9.4 (7.4 to 11.7)   | 0.2 (-0.4 to 1)     | 264.5 (221.6 to 325.5) | 270.6 (207.4 to 343.6) | 0.2 (-0.4 to 1)     |
| Bahrain             | 79.6 (59.8 to 104.5)   | 82 (62.1 to 108.3)     | 0.1 (-0.2 to 0.3)   | 5.7 (4.3 to 8.3)    | 4.4 (3.2 to 5.9)    | -0.6 (-1.2 to 0.2)  | 148 (119 to 206.7)     | 98.3 (72.7 to 133.4)   | -0.8 (-1.3 to -0.1) |

|                                  |                        |                        |                     |                     |                    |                     |                        |                        |                     |
|----------------------------------|------------------------|------------------------|---------------------|---------------------|--------------------|---------------------|------------------------|------------------------|---------------------|
| Bangladesh                       | 2 (1.4 to 2.7)         | 2.1 (1.5 to 2.8)       | 0.1 (-0.1 to 0.4)   | 0.5 (0.2 to 0.9)    | 0.5 (0.3 to 0.7)   | -0.1 (-1 to 1.5)    | 12.1 (5.9 to 20.9)     | 11.1 (6 to 17.6)       | -0.2 (-1.1 to 1.5)  |
| Barbados                         | 68.3 (52.2 to 88)      | 72.6 (54.8 to 95.4)    | 0.1 (-0.1 to 0.4)   | 6.4 (5.4 to 7.7)    | 6.8 (5.3 to 8.4)   | 0.3 (-0.4 to 1.1)   | 174.7 (149.7 to 209.1) | 173.6 (134.4 to 216.8) | 0.1 (-0.5 to 0.8)   |
| Belarus                          | 44.7 (32.8 to 60.3)    | 56.9 (42.1 to 76.7)    | 0.5 (0.3 to 0.8)    | 9.5 (6.2 to 13)     | 10.2 (6.8 to 14.9) | -0.1 (-0.7 to 0.9)  | 333.2 (209.2 to 463.8) | 395 (259.3 to 554.2)   | 0.1 (-0.6 to 1.1)   |
| Belgium                          | 101.7 (75.3 to 132)    | 87.3 (69.6 to 106.8)   | -0.2 (-0.6 to 0.2)  | 7.4 (4.3 to 8.7)    | 4 (3.1 to 4.8)     | -0.8 (-1.1 to -0.3) | 128.5 (89.9 to 145.4)  | 68.4 (57.1 to 85.6)    | -0.7 (-1.1 to -0.3) |
| Belize                           | 48.7 (37.1 to 64.9)    | 52.9 (39.8 to 69.1)    | 0.2 (-0.1 to 0.4)   | 5.4 (3.9 to 7)      | 6.1 (4.7 to 7.2)   | 0.9 (-0.2 to 2.7)   | 155.4 (116.6 to 196)   | 166.3 (129.6 to 196.2) | 0.8 (-0.2 to 2.6)   |
| Benin                            | 210.4 (136.3 to 301.2) | 218.1 (142.3 to 311.1) | 0.1 (-0.1 to 0.3)   | 8.5 (4.5 to 12.4)   | 5.5 (3.9 to 7.4)   | -1 (-1.3 to -0.3)   | 226 (127.6 to 316.3)   | 154.6 (111.9 to 209.6) | -0.9 (-1.3 to -0.2) |
| Bermuda                          | 66.3 (50.7 to 85.9)    | 62.6 (47.8 to 82)      | -0.1 (-0.3 to 0.1)  | 6.1 (4.8 to 8.4)    | 5.2 (3.6 to 6.5)   | -0.1 (-1 to 1.3)    | 147.9 (116.3 to 204.6) | 116.7 (85.2 to 145.6)  | -0.1 (-1 to 1.2)    |
| Bhutan                           | 1.5 (1 to 2.1)         | 1.7 (1.2 to 2.4)       | 0.3 (0 to 0.5)      | 0.4 (0.2 to 0.9)    | 0.5 (0.3 to 0.8)   | 0.1 (-0.7 to 2.1)   | 10.3 (4.2 to 19.8)     | 10.3 (6.3 to 17.1)     | 0 (-0.9 to 2)       |
| Bolivia (Plurinational State of) | 5.5 (3.2 to 9.2)       | 10.4 (6.9 to 15.2)     | 2.5 (1.2 to 5.2)    | 2.7 (1.7 to 4)      | 2.4 (1.6 to 3.3)   | -0.6 (-1.1 to 0.3)  | 82.7 (46.1 to 129.7)   | 62.7 (41 to 84.5)      | -0.8 (-1.2 to 0.1)  |
| Bosnia and Herzegovina           | 132.4 (95.5 to 181.5)  | 104 (73.6 to 142.3)    | -0.4 (-0.6 to -0.2) | 13.7 (7.7 to 20.6)  | 15.2 (7.9 to 22)   | -0.1 (-0.7 to 0.8)  | 246.4 (158.6 to 349.2) | 262.6 (139.8 to 386.7) | 0 (-0.7 to 0.8)     |
| Botswana                         | 237 (152 to 336.5)     | 239.9 (156.1 to 339.7) | 0 (-0.2 to 0.2)     | 15.7 (12.1 to 21.3) | 11.8 (8.5 to 17.5) | -0.6 (-1.1 to 0.1)  | 349.9 (271.3 to 474.4) | 275 (197.7 to 402.6)   | -0.5 (-1 to 0.2)    |
| Brazil                           | 84.2 (60 to 115.3)     | 81.4 (58.4 to 110.1)   | 0 (-0.1 to 0.1)     | 15.7 (12.1 to 17.3) | 9.1 (8 to 10.7)    | -1.1 (-1.2 to -0.8) | 386.8 (303.6 to 425.5) | 227.3 (201.4 to 257.9) | -1 (-1.2 to -0.8)   |
| Brunei Darussalam                | 69.9 (52 to 92.2)      | 56.5 (41.1 to 75.8)    | -0.4 (-0.5 to -0.2) | 10 (7.4 to 15.1)    | 9 (7 to 11)        | -0.6 (-1 to 0)      | 276.9 (210.8 to 415.1) | 221.8 (179.2 to 273.3) | -0.7 (-1.1 to -0.2) |
| Bulgaria                         | 18.7 (13.2 to 25.9)    | 15.9 (11.2 to 22.1)    | -0.3 (-0.5 to 0)    | 2.3 (1.2 to 7.6)    | 5.2 (4 to 6.9)     | 0.9 (-0.8 to 3.7)   | 57.3 (35.7 to 145.5)   | 114.8 (87.5 to 146.6)  | 0.7 (-0.9 to 2.8)   |
| Burkina Faso                     | 204 (134.5 to 288.9)   | 200.9 (129.5 to 285.5) | 0 (-0.2 to 0.2)     | 9.3 (4.8 to 14.9)   | 7.4 (5.2 to 10.2)  | -0.8 (-1.2 to 0)    | 236.5 (125.3 to 367.9) | 192.7 (138 to 262.5)   | -0.7 (-1.2 to 0.1)  |
| Burundi                          | 266.9 (177.5 to 373.2) | 273.4 (177.2 to 389.8) | 0 (-0.2 to 0.2)     | 5.3 (3.3 to 8)      | 3.8 (2.5 to 5.2)   | -0.9 (-1.4 to 0)    | 201.6 (122.2 to 299)   | 140.8 (99.5 to 192.3)  | -0.9 (-1.4 to 0)    |
| Cabo Verde                       | 248.1 (159.1 to 352.2) | 267.7 (176.6 to 377.9) | 0.2 (0 to 0.4)      | 2.3 (1.7 to 2.9)    | 3.1 (2.3 to 4)     | 0.5 (-0.3 to 1.8)   | 81.5 (63.3 to 103.6)   | 92.3 (73.3 to 117.4)   | 0.3 (-0.4 to 1.1)   |
| Cambodia                         | 26 (19 to 34.8)        | 27.7 (20.3 to 36.6)    | 0.2 (-0.1 to 0.4)   | 3.2 (2.1 to 4.9)    | 3.4 (2.5 to 4.6)   | -0.1 (-0.8 to 1.1)  | 79.9 (49.8 to 147.6)   | 73.7 (55.3 to 110.4)   | -0.3 (-1 to 1)      |
| Cameroon                         | 173.7 (121.6 to 241.3) | 205.4 (129.8 to 298.3) | 0.4 (-0.1 to 1.1)   | 8.5 (4.4 to 12.1)   | 5.9 (4.1 to 8.2)   | -0.8 (-1.3 to 0)    | 213 (114.1 to 298.8)   | 160.3 (112.2 to 224.1) | -0.8 (-1.2 to 0.2)  |

|                                       |                        |                        |                     |                    |                  |                     |                        |                        |                     |
|---------------------------------------|------------------------|------------------------|---------------------|--------------------|------------------|---------------------|------------------------|------------------------|---------------------|
| Canada                                | 285.4 (214.6 to 372.9) | 143.2 (114.9 to 177.7) | -1 (-1.1 to -0.8)   | 3.5 (3 to 4.2)     | 2.3 (1.8 to 3.2) | -0.6 (-1 to -0.2)   | 115.9 (98.9 to 132.6)  | 68.7 (57.9 to 88.4)    | -0.8 (-1 to -0.5)   |
| Central African Republic              | 191.8 (124.1 to 275.9) | 176.1 (114.7 to 251.1) | -0.2 (-0.4 to 0)    | 11.7 (5.7 to 19.4) | 10 (5.1 to 16)   | -0.4 (-0.9 to 0.4)  | 322.5 (155.4 to 506.8) | 273.3 (139.1 to 412.7) | -0.4 (-0.9 to 0.3)  |
| Chad                                  | 193.8 (125.8 to 278.2) | 205.6 (130.4 to 292.9) | 0.2 (0 to 0.5)      | 8.2 (4.2 to 13.2)  | 6 (4.2 to 8.2)   | -0.8 (-1.2 to 0.1)  | 211.7 (113.6 to 320.4) | 163.2 (116 to 224.6)   | -0.7 (-1.2 to 0.1)  |
| Chile                                 | 94.1 (65.9 to 131.6)   | 77 (55.3 to 103.7)     | -0.3 (-0.5 to 0)    | 5.2 (4.4 to 7.3)   | 3.6 (3.1 to 4.8) | -0.9 (-1.1 to -0.7) | 135.9 (116.7 to 175.3) | 93.3 (82 to 112.9)     | -0.9 (-1.1 to -0.7) |
| China                                 | 10.7 (8.1 to 13.8)     | 11.5 (8.6 to 14.8)     | 0.2 (0.1 to 0.3)    | 0.9 (0.5 to 1.7)   | 0.8 (0.6 to 1.1) | 0.2 (-1.1 to 2.4)   | 30.4 (19.1 to 59.3)    | 24 (17.8 to 30.5)      | 0.1 (-1.1 to 1.9)   |
| Colombia                              | 29.1 (21.7 to 39.4)    | 25.9 (19.4 to 34.6)    | -0.2 (-0.4 to 0)    | 3 (2.6 to 3.4)     | 1.9 (1.4 to 2.5) | -1.2 (-1.4 to -0.9) | 80.7 (70.5 to 92.2)    | 49.6 (37.3 to 67.8)    | -1.2 (-1.4 to -0.9) |
| Comoros                               | 279 (186 to 396)       | 288.5 (192.3 to 403.4) | 0.1 (-0.2 to 0.3)   | 4.4 (2.5 to 6.3)   | 3.4 (2.1 to 4.7) | -0.7 (-1.2 to 0.8)  | 170.7 (95.8 to 246.9)  | 127.8 (82.3 to 172.2)  | -0.6 (-1.2 to 0.9)  |
| Congo                                 | 236.3 (154.6 to 335.9) | 237.1 (152.9 to 335.8) | 0 (-0.2 to 0.3)     | 11 (5.9 to 15.6)   | 8.3 (4.8 to 12)  | -0.8 (-1.2 to 0.1)  | 300 (156.8 to 410.2)   | 224 (137.1 to 313.5)   | -0.8 (-1.3 to 0.2)  |
| Cook Islands                          | 9.2 (6.9 to 12.2)      | 9.2 (6.8 to 12.2)      | 0 (-0.2 to 0.2)     | 1.3 (0.9 to 1.7)   | 0.8 (0.6 to 1)   | -1 (-1.3 to -0.5)   | 39.1 (27.8 to 54)      | 21.8 (15.7 to 28.7)    | -1 (-1.3 to -0.5)   |
| Costa Rica                            | 50.5 (37.4 to 66.8)    | 49.3 (37.3 to 64.5)    | 0 (-0.2 to 0.3)     | 5.3 (4.5 to 6.2)   | 3.9 (2.9 to 5.6) | -0.7 (-1.1 to -0.1) | 136.1 (119.1 to 155.2) | 99.8 (74.8 to 134.1)   | -0.7 (-1 to -0.1)   |
| Croatia                               | 54.8 (38.9 to 75.1)    | 37.7 (27.9 to 50.1)    | -0.6 (-0.9 to -0.2) | 7.2 (5.6 to 10.1)  | 6.8 (4.9 to 9.4) | 0.4 (-0.3 to 1.3)   | 121.6 (100.3 to 186.3) | 113.9 (80 to 166)      | 0.5 (-0.4 to 1.4)   |
| Cuba                                  | 40.5 (30.2 to 53.9)    | 49.7 (36.7 to 66.8)    | 0.5 (0.2 to 0.8)    | 2.7 (2.2 to 4.5)   | 4.9 (3.7 to 6.2) | 2.2 (0.6 to 3.8)    | 86.5 (70.6 to 127.3)   | 133.3 (101.8 to 166.7) | 1.6 (0.4 to 2.8)    |
| Cyprus                                | 63.5 (47.9 to 82.9)    | 53.4 (41.9 to 67.3)    | -0.3 (-0.5 to 0.1)  | 6.9 (4.3 to 10.5)  | 4.3 (3.4 to 6.2) | -0.9 (-1.3 to -0.4) | 141.7 (92.7 to 183)    | 82.6 (64 to 102.3)     | -1 (-1.2 to -0.5)   |
| Czechia                               | 48.2 (35.4 to 65.1)    | 53.3 (38.5 to 74.1)    | 0.2 (-0.1 to 0.8)   | 3.8 (3.2 to 6.7)   | 3.2 (2.4 to 4.5) | 4.2 (0.6 to 7.6)    | 114.3 (95 to 139.8)    | 87.4 (62.2 to 111.2)   | 3.7 (0.7 to 6.6)    |
| Côte d'Ivoire                         | 237.3 (155.5 to 338.3) | 238.5 (153.2 to 341.7) | 0 (-0.2 to 0.2)     | 8.2 (4.2 to 11.6)  | 5.2 (3.6 to 7)   | -1 (-1.4 to -0.3)   | 213.7 (114.8 to 295.1) | 143.8 (101.3 to 189.5) | -0.9 (-1.3 to -0.2) |
| Democratic People's Republic of Korea | 13.7 (10.3 to 18.1)    | 13.3 (9.9 to 17.4)     | 0 (-0.2 to 0.2)     | 1.8 (1.1 to 2.9)   | 1.6 (1.1 to 2.3) | -0.1 (-0.7 to 0.9)  | 55 (33.9 to 96)        | 44.4 (30.4 to 64.9)    | -0.2 (-0.8 to 0.9)  |
| Democratic Republic of the Congo      | 214.7 (139 to 310.4)   | 204.5 (129.9 to 293.3) | -0.1 (-0.3 to 0.1)  | 9.6 (5.3 to 14.9)  | 8.6 (4.9 to 15)  | -0.4 (-1 to 0.5)    | 265.7 (147.8 to 389.4) | 231 (139.4 to 380.1)   | -0.4 (-1 to 0.5)    |
| Denmark                               | 33.9 (25.8 to 43.4)    | 23.7 (18.1 to 30.3)    | -0.6 (-0.7 to -0.5) | 2.4 (1.8 to 4.3)   | 1.9 (1.5 to 3.3) | -0.5 (-0.8 to -0.2) | 67.9 (55.9 to 93.3)    | 46.3 (38.3 to 60.9)    | -0.7 (-0.9 to -0.4) |

|                    |                        |                        |                    |                     |                     |                     |                        |                        |                     |
|--------------------|------------------------|------------------------|--------------------|---------------------|---------------------|---------------------|------------------------|------------------------|---------------------|
| Djibouti           | 275.4 (178.8 to 389.5) | 307.2 (201.6 to 432.1) | 0.3 (0 to 0.5)     | 4.7 (2.8 to 6.7)    | 4 (2.2 to 6.1)      | -0.4 (-1 to 0.6)    | 177.8 (109.6 to 255.1) | 151.8 (90.9 to 235)    | -0.4 (-0.9 to 0.7)  |
| Dominica           | 83.7 (64.1 to 108.6)   | 85.5 (64.6 to 111.2)   | 0.1 (-0.2 to 0.4)  | 19.5 (15.7 to 26.7) | 21.9 (16.1 to 27.8) | 0.6 (-0.3 to 2)     | 490.2 (395.3 to 666.6) | 539 (392.6 to 697.2)   | 0.5 (-0.4 to 1.9)   |
| Dominican Republic | 17.4 (13.2 to 23.1)    | 19.8 (14.9 to 26.6)    | 0.3 (0 to 0.6)     | 2 (1.5 to 2.8)      | 2.6 (1.6 to 3.6)    | 1.2 (-0.1 to 3.2)   | 62.4 (49.5 to 86.7)    | 73.6 (46 to 100.9)     | 1 (-0.3 to 2.9)     |
| Ecuador            | 12.9 (9 to 17.9)       | 15.3 (11.3 to 20.5)    | 0.5 (0.2 to 0.9)   | 1.6 (1.2 to 2.4)    | 1.7 (1.3 to 2.3)    | -0.3 (-0.9 to 0.5)  | 43.1 (33.9 to 64.8)    | 45.4 (34.2 to 59)      | -0.4 (-0.9 to 0.4)  |
| Egypt              | 24.6 (16.8 to 35.9)    | 29.1 (19.6 to 41.9)    | 0.3 (-0.1 to 0.8)  | 3.9 (2.3 to 6.4)    | 2.7 (1.8 to 4.3)    | -0.7 (-1.2 to 0.1)  | 166.9 (89.4 to 316.4)  | 93.9 (60.7 to 148.3)   | -0.8 (-1.3 to 0.2)  |
| El Salvador        | 7.2 (5.1 to 10)        | 8.4 (6.1 to 11.3)      | 0.4 (0.1 to 0.7)   | 0.9 (0.6 to 1.1)    | 0.7 (0.5 to 1)      | -0.8 (-1.2 to -0.1) | 26.9 (19.1 to 33.6)    | 19.4 (13.3 to 26.3)    | -0.8 (-1.2 to -0.2) |
| Equatorial Guinea  | 198.9 (127 to 281.1)   | 230.7 (151.1 to 327.5) | 0.3 (0 to 0.6)     | 10.4 (4.9 to 17.3)  | 7 (3.4 to 11.3)     | -1 (-1.5 to 0.1)    | 289.5 (132.7 to 456.9) | 184.2 (93.5 to 295.7)  | -1 (-1.5 to 0.1)    |
| Eritrea            | 201.4 (131.5 to 289.3) | 223.8 (147 to 323)     | 0.2 (0 to 0.5)     | 4.5 (2.7 to 6.6)    | 3.9 (2.2 to 5.4)    | -0.6 (-1.1 to 0.3)  | 164.2 (95.5 to 241.6)  | 138.3 (87.2 to 195.6)  | -0.5 (-1.1 to 0.3)  |
| Estonia            | 63.5 (45.5 to 87.6)    | 74.7 (52.9 to 103.8)   | 0.4 (0.1 to 0.7)   | 12.4 (7.5 to 15.9)  | 9.3 (6.3 to 12.3)   | -0.3 (-0.9 to 0.5)  | 443.4 (268.5 to 570.2) | 298.9 (207.6 to 393.4) | -0.5 (-1 to 0.3)    |
| Eswatini           | 223.3 (143.2 to 319.9) | 214.7 (136.2 to 309.8) | -0.1 (-0.3 to 0.1) | 14.9 (11.2 to 20.1) | 11.9 (8.2 to 18.3)  | -0.5 (-1 to 0.3)    | 332.9 (254.3 to 438.2) | 271.4 (190.7 to 401.8) | -0.4 (-0.9 to 0.4)  |
| Ethiopia           | 263.6 (193.1 to 340.7) | 306.8 (226.8 to 394.2) | 0.3 (0.2 to 0.4)   | 4.3 (2.5 to 6.7)    | 3.1 (2.1 to 4)      | -0.8 (-1.4 to 0.5)  | 168.7 (101.4 to 255.7) | 116.7 (84.2 to 148.1)  | -0.8 (-1.4 to 0.4)  |
| Fiji               | 24 (17.7 to 31.7)      | 23.8 (17.8 to 31.7)    | 0 (-0.2 to 0.2)    | 3.4 (2.7 to 4.6)    | 3.4 (2.4 to 4.3)    | -0.4 (-0.9 to 0.4)  | 102 (80 to 137.1)      | 105.8 (75.6 to 139)    | -0.3 (-0.8 to 0.5)  |
| Finland            | 83.1 (63.6 to 105.5)   | 74.2 (57.4 to 93.6)    | -0.2 (-0.5 to 0.1) | 6.2 (4.2 to 11.2)   | 5.4 (4.2 to 7.4)    | -0.2 (-0.8 to 0.6)  | 189.7 (130.2 to 275.5) | 143.9 (110.3 to 164.9) | -0.4 (-0.9 to 0.3)  |
| France             | 173.8 (134.7 to 219.9) | 92.5 (71.6 to 116.5)   | -0.9 (-1 to -0.8)  | 7.3 (5.4 to 8.3)    | 3.8 (3 to 4.7)      | -1.1 (-1.3 to -0.8) | 148.1 (121.5 to 163.8) | 72.1 (59.7 to 95)      | -1.1 (-1.3 to -0.8) |
| Gabon              | 236 (152.5 to 334.4)   | 235.2 (154.5 to 337.3) | 0 (-0.2 to 0.2)    | 10 (5 to 14.8)      | 7.9 (4.2 to 11.1)   | -0.7 (-1.2 to 0.2)  | 276.7 (141.7 to 395.5) | 213.7 (119.1 to 299.2) | -0.7 (-1.2 to 0.2)  |
| Gambia             | 249.6 (161.9 to 356.8) | 261.8 (171.2 to 366.4) | 0 (-0.2 to 0.3)    | 7.6 (4.1 to 11.6)   | 5.7 (4.1 to 7.8)    | -0.8 (-1.3 to 0.1)  | 197 (112.7 to 290)     | 155.9 (114.6 to 208.7) | -0.7 (-1.2 to 0.1)  |
| Georgia            | 17.3 (13 to 22.7)      | 16 (11.2 to 21.9)      | -0.1 (-0.3 to 0.2) | 3.3 (2.4 to 4.2)    | 4 (2.5 to 5.7)      | 0.6 (-0.3 to 3.2)   | 87.5 (67.7 to 110.6)   | 112.5 (77.2 to 163.7)  | 1 (-0.1 to 3.8)     |

|                            |                        |                        |                     |                    |                    |                     |                        |                        |                     |
|----------------------------|------------------------|------------------------|---------------------|--------------------|--------------------|---------------------|------------------------|------------------------|---------------------|
| Germany                    | 100.5 (77.2 to 129.5)  | 85.1 (65.3 to 108.9)   | -0.3 (-0.5 to -0.1) | 9.7 (7.3 to 12)    | 5.4 (4.5 to 6.5)   | -0.9 (-1.2 to -0.6) | 212.1 (162 to 259.6)   | 110.2 (93.6 to 129.5)  | -0.9 (-1.2 to -0.6) |
| Ghana                      | 180.4 (125.3 to 255.5) | 202.4 (128.8 to 296.1) | 0.2 (-0.3 to 0.9)   | 8.5 (6.5 to 12.2)  | 10.1 (6.6 to 13.3) | 0.2 (-0.7 to 1.5)   | 212.2 (159.6 to 294.5) | 248.7 (169 to 330.8)   | 0.2 (-0.7 to 1.5)   |
| Greece                     | 58.2 (44.8 to 73.8)    | 43.9 (33.4 to 56.2)    | -0.5 (-0.6 to -0.3) | 6.1 (3.4 to 7)     | 3.5 (2.7 to 4)     | -1 (-1.2 to -0.5)   | 100.1 (66.6 to 112.5)  | 71.5 (49.4 to 82.4)    | -0.8 (-1 to -0.4)   |
| Greenland                  | 277.1 (215.4 to 351)   | 209.5 (162.8 to 268.6) | -0.5 (-0.6 to -0.3) | 13.5 (10 to 16.9)  | 11 (7.7 to 14.2)   | -0.3 (-0.9 to 0.4)  | 418.7 (319.4 to 517)   | 287.9 (204.7 to 378.8) | -0.5 (-1 to 0.2)    |
| Grenada                    | 56.1 (41.9 to 73.9)    | 57.9 (43.4 to 75.5)    | 0.1 (-0.1 to 0.4)   | 10.3 (8.8 to 12.4) | 10.6 (7.9 to 12.4) | 0.3 (-0.6 to 1.2)   | 275.6 (233.5 to 335.2) | 263.3 (196.3 to 311.3) | 0.2 (-0.7 to 1.1)   |
| Guam                       | 37.2 (27.5 to 49.6)    | 38.9 (28.9 to 52)      | 0.1 (-0.1 to 0.4)   | 4.4 (3.4 to 6)     | 2.5 (1.9 to 3.8)   | -1.2 (-1.4 to -0.8) | 120.8 (95.7 to 156.5)  | 85.6 (65.1 to 125.3)   | -1 (-1.3 to -0.5)   |
| Guatemala                  | 8.9 (5.9 to 12.7)      | 11.6 (8.3 to 16)       | 0.6 (0.3 to 1.1)    | 1.2 (0.9 to 1.6)   | 1.2 (0.8 to 1.5)   | -0.5 (-1.2 to 0.3)  | 33.5 (24 to 48.4)      | 31.8 (22.1 to 41.4)    | -0.6 (-1.2 to 0.4)  |
| Guinea                     | 207.6 (149.5 to 279.6) | 229.5 (153.3 to 320.4) | 0.2 (-0.3 to 0.7)   | 8.6 (4.4 to 12.5)  | 6.2 (4.3 to 8.3)   | -0.8 (-1.3 to 0)    | 226 (119.7 to 322.3)   | 173 (122.3 to 234.6)   | -0.7 (-1.2 to 0.1)  |
| Guinea-Bissau              | 203.1 (133.1 to 292.6) | 218.2 (142.2 to 313)   | 0.1 (-0.1 to 0.4)   | 9.4 (4.2 to 15.7)  | 6.3 (4.3 to 8.9)   | -1 (-1.4 to 0)      | 250.8 (113.4 to 417.2) | 176.3 (120.5 to 250.4) | -0.9 (-1.3 to 0.1)  |
| Guyana                     | 32.8 (24.6 to 44.7)    | 28.7 (21.4 to 38.5)    | -0.3 (-0.5 to 0)    | 10.4 (8.6 to 13)   | 10.1 (7.4 to 13.1) | -0.2 (-0.8 to 0.6)  | 304.7 (247.1 to 370.7) | 281.6 (201.3 to 372.8) | -0.3 (-0.8 to 0.5)  |
| Haiti                      | 27 (19.8 to 36.4)      | 29.8 (22.3 to 39.8)    | 0.2 (-0.1 to 0.5)   | 11.6 (6.3 to 18.7) | 9.5 (5.4 to 14.8)  | -0.5 (-1 to 0.3)    | 340.9 (176.7 to 559.1) | 279.6 (152.4 to 465.8) | -0.5 (-1 to 0.3)    |
| Honduras                   | 27.2 (18.7 to 38.9)    | 32.6 (23.4 to 45.3)    | 0.5 (0.1 to 1)      | 5.1 (3.4 to 7.1)   | 5.9 (3.8 to 8.1)   | 0 (-0.6 to 0.8)     | 127.2 (87.2 to 171.9)  | 130 (80.3 to 181.2)    | -0.2 (-0.7 to 0.6)  |
| Hungary                    | 71.6 (49.7 to 99.6)    | 71.1 (46.1 to 101.4)   | 0 (-0.3 to 0.3)     | 21.1 (14 to 24.9)  | 11.3 (8 to 17.7)   | -0.6 (-1.1 to 0.4)  | 436.5 (307.2 to 516.1) | 290.2 (203.5 to 416.5) | -0.5 (-1.1 to 0.3)  |
| Iceland                    | 36.5 (27.7 to 47.2)    | 29.6 (23.3 to 37.4)    | -0.4 (-0.6 to -0.1) | 2.4 (1.7 to 2.8)   | 1.3 (1 to 1.6)     | -1 (-1.2 to -0.7)   | 49.3 (37.5 to 57.2)    | 25.3 (21.3 to 30.8)    | -1 (-1.2 to -0.7)   |
| India                      | 1.9 (1.3 to 2.6)       | 1.9 (1.3 to 2.7)       | 0.1 (0 to 0.1)      | 0.5 (0.3 to 0.8)   | 0.4 (0.3 to 0.5)   | -0.5 (-0.9 to 0.3)  | 11.6 (6.2 to 18.9)     | 9.2 (6.5 to 12.5)      | -0.4 (-0.9 to 0.4)  |
| Indonesia                  | 37.9 (28.9 to 49.3)    | 42.2 (32.2 to 54.9)    | 0.2 (0.1 to 0.3)    | 3.4 (2.7 to 4.8)   | 4.2 (2.8 to 5.5)   | 0.1 (-0.6 to 1)     | 81 (61.7 to 128.4)     | 83.6 (58.6 to 118.4)   | -0.1 (-0.8 to 0.8)  |
| Iran (Islamic Republic of) | 22.2 (16.8 to 28.9)    | 22.4 (16.9 to 28.9)    | 0 (-0.1 to 0.1)     | 2.3 (1.7 to 3.2)   | 1.7 (1.1 to 2.1)   | -0.7 (-1.2 to -0.2) | 64 (49.2 to 85.7)      | 41.5 (30 to 51.4)      | -0.7 (-1.2 to -0.2) |
| Iraq                       | 48 (37.3 to 62.2)      | 47.3 (36.5 to 60.5)    | 0 (-0.2 to 0.2)     | 5.2 (3.7 to 7.9)   | 4.5 (3.3 to 6.8)   | -0.8 (-1.2 to -0.1) | 160.7 (118.4 to 225.6) | 118.7 (89.6 to 165.6)  | -0.9 (-1.3 to -0.2) |
| Ireland                    | 87.4 (67.1 to 112.9)   | 63.9 (48.9 to 81.8)    | -0.5 (-0.7 to -0.4) | 13.1 (6.9 to 15.3) | 4 (3.1 to 5.5)     | -1.1 (-1.5 to -0.6) | 213.5 (137.2 to 246)   | 74 (58.8 to 102.8)     | -1.1 (-1.4 to -0.7) |
| Israel                     | 42.2 (32.7 to 53.9)    | 32.5 (25.2 to 41.2)    | -0.5 (-0.6 to -0.3) | 3.1 (2.7 to 4)     | 1.5 (1.1 to 2.6)   | -1.3 (-1.5 to -0.9) | 80 (64.2 to 89.8)      | 33.4 (28 to 48.7)      | -1.3 (-1.5 to -1)   |

|                                  |                        |                        |                    |                     |                   |                     |                        |                         |                     |
|----------------------------------|------------------------|------------------------|--------------------|---------------------|-------------------|---------------------|------------------------|-------------------------|---------------------|
| Italy                            | 115.1 (80.9 to 157.5)  | 143.2 (104.5 to 187.6) | 0.4 (0.1 to 0.7)   | 26.5 (7 to 32.1)    | 4 (3.2 to 5.2)    | -1.8 (-1.9 to -1.2) | 346.6 (140.9 to 408.7) | 71.5 (59.5 to 101.5)    | -1.6 (-1.8 to -1.1) |
| Jamaica                          | 32.2 (25.1 to 41)      | 37.2 (28.6 to 47)      | 0.4 (0.1 to 0.6)   | 3.8 (3 to 4.6)      | 3.8 (2.9 to 4.9)  | 1.1 (0 to 2.8)      | 111.2 (87 to 132.8)    | 109 (83.1 to 141.8)     | 1.1 (0.1 to 2.8)    |
| Japan                            | 88.3 (66.3 to 116.5)   | 80.1 (63.7 to 99.3)    | -0.2 (-0.4 to 0.1) | 5 (2.6 to 5.6)      | 2.1 (1.5 to 2.4)  | -1.1 (-1.3 to -0.7) | 112.4 (81.4 to 122.7)  | 54.5 (46 to 63.2)       | -1 (-1.2 to -0.7)   |
| Jordan                           | 11.1 (8.5 to 14)       | 11.9 (9 to 14.9)       | 0.1 (-0.1 to 0.3)  | 1.2 (0.8 to 1.6)    | 0.6 (0.5 to 0.8)  | -1.1 (-1.5 to -0.5) | 31.3 (19.4 to 41.8)    | 15 (11.8 to 20.4)       | -1.1 (-1.4 to -0.4) |
| Kazakhstan                       | 71 (52.7 to 95.3)      | 67.3 (49.2 to 90.1)    | 0 (-0.3 to 0.2)    | 3.2 (1.8 to 9.3)    | 25.1 (8.1 to 33)  | 10.9 (-0.1 to 26.9) | 113 (64.6 to 319)      | 790.1 (280.8 to 1057.8) | 9.8 (-0.1 to 23.7)  |
| Kenya                            | 224.6 (148.7 to 318.8) | 217.2 (144.4 to 307.2) | -0.1 (-0.1 to 0)   | 3.2 (2.2 to 4.2)    | 3.3 (2.1 to 4.6)  | -0.1 (-0.5 to 0.4)  | 115.6 (83.1 to 145.8)  | 110.6 (73.7 to 151)     | -0.1 (-0.5 to 0.4)  |
| Kiribati                         | 13.2 (9.4 to 18.4)     | 13.9 (9.8 to 19)       | 0.1 (-0.1 to 0.3)  | 2.9 (1.4 to 4)      | 2.6 (1.1 to 3.8)  | -0.3 (-0.8 to 0.4)  | 94.5 (42 to 136.1)     | 85 (32.7 to 131.3)      | -0.3 (-0.9 to 0.5)  |
| Kuwait                           | 21.7 (16.2 to 28.2)    | 22.2 (16.7 to 29)      | 0 (-0.1 to 0.2)    | 1.6 (1.4 to 1.9)    | 1.1 (0.8 to 1.3)  | -0.8 (-1.2 to -0.3) | 48.8 (41.3 to 57.5)    | 27.4 (21.7 to 34.6)     | -0.9 (-1.2 to -0.5) |
| Kyrgyzstan                       | 20.3 (13.9 to 29)      | 23.2 (16.1 to 32.8)    | 0.2 (0 to 0.5)     | 4.6 (3.3 to 5.5)    | 7 (3.7 to 8.7)    | 0.7 (-0.4 to 1.5)   | 170 (119 to 202.9)     | 257.7 (127.3 to 321.4)  | 0.7 (-0.5 to 1.6)   |
| Lao People's Democratic Republic | 23.8 (17.7 to 31.7)    | 26.3 (19.4 to 35)      | 0.2 (0 to 0.5)     | 3.5 (2.1 to 5.9)    | 3.9 (2.8 to 5.1)  | -0.3 (-0.9 to 1.1)  | 79.8 (46.3 to 166.6)   | 85.2 (60.7 to 125.2)    | -0.3 (-1 to 1.2)    |
| Latvia                           | 91.2 (66.1 to 124.3)   | 148.8 (105 to 205.6)   | 1.3 (0.7 to 1.8)   | 16.1 (12.5 to 19.7) | 24 (16.5 to 30.7) | 4.1 (1.2 to 6.7)    | 619 (448.2 to 756.9)   | 858.2 (599.8 to 1107.1) | 3.8 (1.2 to 6.3)    |
| Lebanon                          | 31.4 (23.6 to 41.6)    | 33.4 (25.3 to 42.8)    | 0.1 (-0.1 to 0.3)  | 3.1 (2.2 to 4.7)    | 2 (1.4 to 2.9)    | -0.9 (-1.3 to -0.3) | 85 (59.8 to 136)       | 52.6 (36.5 to 84)       | -0.8 (-1.3 to -0.2) |
| Lesotho                          | 194.1 (123.2 to 277.5) | 194.6 (125.4 to 282)   | 0 (-0.2 to 0.2)    | 15 (11.1 to 21.4)   | 15 (10.7 to 22.7) | -0.1 (-0.7 to 1)    | 327.1 (247 to 450.6)   | 328.7 (235.6 to 491.6)  | 0 (-0.7 to 1.3)     |
| Liberia                          | 232.1 (150.4 to 331.5) | 258.3 (170.1 to 366.7) | 0.2 (0 to 0.5)     | 8.2 (4.4 to 12.1)   | 5.3 (3.5 to 7.8)  | -1 (-1.4 to -0.2)   | 217.4 (122 to 312.4)   | 142.5 (99.7 to 206.6)   | -1 (-1.4 to -0.1)   |
| Libya                            | 23.4 (17.9 to 31.2)    | 26.8 (20.4 to 35.9)    | 0.3 (0 to 0.5)     | 3.1 (2.1 to 4.5)    | 1.8 (1.3 to 2.6)  | -0.8 (-1.3 to 0.1)  | 157.4 (95.3 to 259.3)  | 73.7 (50.2 to 106.2)    | -0.8 (-1.3 to 0)    |
| Lithuania                        | 40.3 (28 to 56.9)      | 44.9 (30.9 to 63.6)    | 0.2 (0 to 0.5)     | 7.6 (6.2 to 9.3)    | 9.4 (6.3 to 12.4) | 0.6 (-0.3 to 1.4)   | 278.5 (229.8 to 338.4) | 332.2 (226.2 to 432.4)  | 0.4 (-0.3 to 1.3)   |
| Luxembourg                       | 103.8 (77.9 to 137.3)  | 99.5 (77.7 to 124.3)   | -0.1 (-0.4 to 0.3) | 7.6 (5.4 to 8.7)    | 3.6 (2.8 to 4.6)  | -1.1 (-1.4 to -0.7) | 147 (111.6 to 166)     | 65.5 (51.4 to 87.2)     | -1.1 (-1.4 to -0.7) |
| Madagascar                       | 256.9 (167.4 to 362.2) | 273.6 (179.6 to 383.6) | 0.1 (-0.1 to 0.4)  | 6.8 (4.5 to 8.6)    | 5.7 (3.7 to 8)    | -0.4 (-1 to 0.4)    | 270.1 (179.8 to 344.5) | 215.2 (143.7 to 319.7)  | -0.5 (-1 to 0.4)    |

|                                  |                        |                        |                     |                     |                    |                     |                        |                        |                     |
|----------------------------------|------------------------|------------------------|---------------------|---------------------|--------------------|---------------------|------------------------|------------------------|---------------------|
| Malawi                           | 272.5 (176.4 to 391.6) | 287.1 (189.7 to 405.1) | 0.1 (-0.1 to 0.4)   | 4.2 (2.8 to 5.4)    | 3.8 (2.5 to 5)     | -0.3 (-0.9 to 0.6)  | 166.4 (110.9 to 223.7) | 140.1 (96.1 to 186.4)  | -0.3 (-0.9 to 0.5)  |
| Malaysia                         | 71.7 (54.2 to 94.6)    | 82.1 (62.1 to 108.9)   | 0.3 (0 to 0.6)      | 3.4 (2.7 to 4.6)    | 2.9 (2.2 to 4)     | -0.7 (-1.1 to -0.2) | 98.6 (80 to 126.9)     | 85.3 (62.7 to 109.5)   | -0.6 (-1 to -0.1)   |
| Maldives                         | 24.7 (18.5 to 32.6)    | 26 (19.4 to 34.6)      | 0.1 (-0.1 to 0.3)   | 1.6 (0.9 to 2.9)    | 1.4 (1 to 1.8)     | -0.8 (-1.4 to 0.6)  | 48.2 (25.3 to 84.7)    | 34.1 (24.6 to 44)      | -0.9 (-1.5 to 0.4)  |
| Mali                             | 194.2 (121.8 to 275.9) | 206.2 (131.4 to 295.2) | 0.1 (-0.1 to 0.4)   | 8.7 (4.5 to 14)     | 6.3 (4.6 to 8.6)   | -0.9 (-1.3 to 0)    | 221.9 (116.5 to 334.2) | 162.9 (119.4 to 222.1) | -0.8 (-1.3 to 0)    |
| Malta                            | 81.8 (61.9 to 105.4)   | 72 (54.8 to 91.3)      | -0.2 (-0.4 to 0.2)  | 10.7 (6.9 to 12.5)  | 3.1 (2.4 to 4.8)   | -1.3 (-1.5 to -0.8) | 179.5 (129.9 to 201.4) | 62.5 (50.2 to 87.7)    | -1.2 (-1.4 to -0.8) |
| Marshall Islands                 | 21 (15.4 to 28.6)      | 21.9 (15.9 to 30)      | 0.1 (-0.2 to 0.3)   | 4.7 (2.9 to 7.1)    | 4.3 (2.5 to 6.4)   | -0.5 (-0.9 to 0.1)  | 125.3 (76.3 to 193.3)  | 120.7 (69.5 to 185.7)  | -0.4 (-0.9 to 0.3)  |
| Mauritania                       | 242.8 (159 to 343)     | 259.2 (169.3 to 365)   | 0.1 (-0.1 to 0.4)   | 8.4 (4.4 to 11.3)   | 4.8 (3.2 to 6.6)   | -1.2 (-1.5 to -0.4) | 219.5 (122.2 to 293.2) | 129.2 (86.1 to 179)    | -1.1 (-1.5 to -0.4) |
| Mauritius                        | 38.9 (29.5 to 50.4)    | 36.5 (27.9 to 47.1)    | -0.1 (-0.3 to 0.1)  | 1.9 (1.5 to 3.4)    | 3.3 (2.1 to 4.2)   | 0.5 (-0.9 to 2)     | 60.3 (46.8 to 105)     | 99.1 (62.9 to 128.4)   | 0.6 (-0.8 to 2.1)   |
| Mexico                           | 15.5 (11.4 to 20.6)    | 14.6 (10.9 to 19.1)    | -0.1 (-0.2 to 0)    | 1.2 (1 to 1.8)      | 1.2 (1 to 1.5)     | -0.2 (-0.8 to 0.4)  | 36.4 (32.7 to 49)      | 40.9 (31 to 49.2)      | -0.1 (-0.7 to 0.6)  |
| Micronesia (Federated States of) | 20.8 (15 to 28.3)      | 20.7 (15.2 to 27.8)    | 0 (-0.2 to 0.2)     | 4.5 (2.7 to 6.9)    | 4.2 (2.2 to 6.3)   | -0.5 (-1 to 0.3)    | 125.1 (71.6 to 197.9)  | 116.5 (54.8 to 187.1)  | -0.5 (-1 to 0.3)    |
| Monaco                           | 165.1 (125.8 to 213.2) | 116.4 (88.3 to 151.2)  | -0.6 (-0.7 to -0.4) | 12.1 (7.9 to 15.6)  | 9 (6.5 to 11.2)    | -0.7 (-1.1 to -0.2) | 241.9 (165.5 to 307.8) | 163.9 (120.9 to 209.8) | -0.8 (-1.2 to -0.3) |
| Mongolia                         | 29.7 (21.5 to 40.1)    | 31.1 (22.2 to 41.8)    | 0.1 (-0.2 to 0.4)   | 9.3 (6.8 to 12.9)   | 8.5 (6.1 to 11.9)  | 0.3 (-0.5 to 1.8)   | 257.5 (174.7 to 398)   | 234.7 (165.7 to 369.2) | 0.3 (-0.5 to 2)     |
| Montenegro                       | 206.3 (149.8 to 275.6) | 174.3 (126.4 to 235.4) | -0.3 (-0.5 to -0.1) | 26 (12.3 to 48.5)   | 29.2 (15.1 to 44)  | 0.3 (-0.5 to 1.6)   | 494.6 (270 to 847.7)   | 503.3 (284.6 to 761.2) | 0.1 (-0.5 to 1.1)   |
| Morocco                          | 19.4 (14.5 to 25.6)    | 20.3 (15.2 to 26.8)    | 0.1 (-0.1 to 0.3)   | 2.9 (1.7 to 4.8)    | 2.5 (1.7 to 3.7)   | -0.6 (-1.1 to 0.2)  | 78.4 (46 to 143.7)     | 58.7 (39.6 to 94.9)    | -0.7 (-1.2 to 0)    |
| Mozambique                       | 258.3 (169 to 366.3)   | 303.6 (204.5 to 423.8) | 0.4 (0.1 to 0.7)    | 3.5 (2.7 to 4.7)    | 3.9 (2.9 to 5.3)   | 0 (-0.6 to 1.2)     | 137.6 (103.8 to 179.9) | 147.3 (110.8 to 191.2) | 0.1 (-0.6 to 1.1)   |
| Myanmar                          | 29.7 (22 to 39.2)      | 30.6 (22.3 to 40.5)    | 0.1 (-0.2 to 0.3)   | 3.7 (2.3 to 6.2)    | 3.5 (2.7 to 4.7)   | -0.5 (-1 to 0.5)    | 96.6 (55.8 to 199.5)   | 84.3 (61.5 to 128.9)   | -0.6 (-1.1 to 0.6)  |
| Namibia                          | 229.4 (145.8 to 322.7) | 222.7 (141.5 to 314.9) | -0.1 (-0.3 to 0.1)  | 15.1 (11.3 to 19.8) | 12.2 (9.2 to 17.3) | -0.4 (-1 to 0.4)    | 330.3 (243.8 to 426)   | 264.1 (197.2 to 377.3) | -0.4 (-1 to 0.5)    |
| Nauru                            | 23.4 (17.2 to 31.9)    | 23.5 (17 to 32.1)      | 0 (-0.2 to 0.2)     | 4.4 (2.6 to 6.4)    | 4.2 (2.5 to 6.4)   | -0.4 (-0.8 to 0.4)  | 130.7 (76 to 201.8)    | 128.5 (76.2 to 196.1)  | -0.3 (-0.8 to 0.4)  |
| Nepal                            | 1.3 (0.9 to 1.9)       | 1.3 (0.9 to 1.8)       | 0 (-0.2 to 0.2)     | 0.4 (0.2 to 0.8)    | 0.5 (0.3 to 0.7)   | 0.1 (-0.7 to 1.5)   | 10.5 (5.2 to 18.3)     | 9.9 (5.8 to 16)        | -0.1 (-0.8 to 1.2)  |

|                          |                        |                        |                     |                     |                     |                     |                        |                        |                     |
|--------------------------|------------------------|------------------------|---------------------|---------------------|---------------------|---------------------|------------------------|------------------------|---------------------|
| Netherlands              | 79.3 (62.7 to 98.2)    | 58.2 (45 to 74.3)      | -0.5 (-0.7 to -0.3) | 9.2 (5.8 to 11)     | 3.4 (2.6 to 5.1)    | -1.4 (-1.6 to -0.8) | 161.9 (118.5 to 185.1) | 60.4 (46.2 to 92.5)    | -1.3 (-1.5 to -0.8) |
| New Zealand              | 95.4 (70.5 to 129.7)   | 73.8 (56.2 to 95.3)    | -0.4 (-0.7 to -0.2) | 6.3 (4.4 to 7.7)    | 3.4 (2.8 to 4)      | -0.9 (-1.1 to -0.6) | 190 (123.4 to 233.8)   | 99.6 (75.6 to 112.2)   | -0.9 (-1.1 to -0.6) |
| Nicaragua                | 15.5 (11 to 21.4)      | 19.2 (14.2 to 25.6)    | 0.6 (0.3 to 1)      | 2 (1.6 to 2.5)      | 2.3 (1.7 to 2.9)    | -0.2 (-0.7 to 0.4)  | 57.2 (43.5 to 72.3)    | 53.2 (38.9 to 66.5)    | -0.5 (-0.9 to 0)    |
| Niger                    | 188.8 (122.3 to 272.9) | 208.9 (136.5 to 298.6) | 0.1 (-0.1 to 0.4)   | 8.6 (4.3 to 14.9)   | 6 (4.1 to 8.6)      | -0.9 (-1.3 to -0.1) | 224.8 (115.3 to 364.7) | 159.7 (109.5 to 229.4) | -0.9 (-1.3 to 0)    |
| Nigeria                  | 209.5 (146.1 to 282)   | 231.9 (161.2 to 312.1) | 0.1 (0 to 0.1)      | 8.8 (4.9 to 12.9)   | 4.8 (3.4 to 6.3)    | -1.2 (-1.5 to -0.5) | 224.8 (127.7 to 328.6) | 130.4 (95.2 to 170)    | -1.1 (-1.4 to -0.5) |
| Niue                     | 29.1 (21.5 to 39.4)    | 30.4 (22.2 to 40.6)    | 0.1 (-0.1 to 0.3)   | 3.5 (2.3 to 4.6)    | 3 (1.8 to 4)        | -0.5 (-1 to 0.1)    | 102.8 (68.9 to 138.1)  | 91.5 (56.6 to 126.7)   | -0.5 (-1 to 0.2)    |
| North Macedonia          | 109.4 (79.4 to 146.2)  | 82.3 (59.6 to 111.4)   | -0.5 (-0.7 to -0.3) | 25.8 (14.9 to 35)   | 22.3 (11.7 to 32.6) | -0.8 (-1.2 to -0.1) | 405.9 (278.8 to 512.9) | 351.6 (200.6 to 477)   | -0.8 (-1.1 to -0.3) |
| Northern Mariana Islands | 73.5 (53.8 to 98.1)    | 73.3 (54 to 97.4)      | -0.1 (-0.3 to 0.2)  | 5.2 (3.8 to 8.1)    | 4.2 (3.2 to 6.4)    | -0.8 (-1.2 to -0.4) | 149.3 (109.1 to 226)   | 122.4 (91.2 to 182.2)  | -0.8 (-1.2 to -0.3) |
| Norway                   | 65.1 (49.5 to 84.9)    | 64.9 (50.8 to 81.7)    | 0 (-0.2 to 0.2)     | 2.2 (1.7 to 4.5)    | 1.9 (1.6 to 2.9)    | -0.6 (-1.1 to -0.2) | 66.7 (56.5 to 97.5)    | 46.7 (40.4 to 55.7)    | -0.8 (-1.1 to -0.5) |
| Oman                     | 15.9 (12.4 to 20.5)    | 16.7 (12.4 to 22.6)    | 0.1 (-0.2 to 0.4)   | 1.9 (1.1 to 3.3)    | 2.3 (1.2 to 3.2)    | -0.4 (-1.3 to 1.6)  | 48.8 (29.3 to 83.4)    | 56.5 (28.6 to 80.4)    | -0.4 (-1.4 to 1.7)  |
| Pakistan                 | 1.8 (1.2 to 2.5)       | 1.8 (1.2 to 2.5)       | 0 (-0.1 to 0.2)     | 0.5 (0.3 to 0.8)    | 0.5 (0.3 to 0.7)    | -0.2 (-0.7 to 0.6)  | 11.9 (6 to 19.5)       | 11.6 (7.3 to 16.6)     | -0.1 (-0.6 to 0.8)  |
| Palau                    | 12.2 (8.6 to 16.8)     | 12.2 (8.8 to 16.6)     | 0 (-0.2 to 0.2)     | 1 (0.7 to 1.4)      | 0.9 (0.6 to 1.1)    | -0.4 (-0.9 to 0.4)  | 31.1 (21.3 to 44.1)    | 25.7 (18.2 to 34.2)    | -0.4 (-0.9 to 0.5)  |
| Palestine                | 39.5 (30.4 to 50.6)    | 41.5 (31.9 to 53)      | 0.1 (-0.1 to 0.3)   | 5.7 (3 to 8.5)      | 3.1 (2.2 to 3.8)    | -1.2 (-1.5 to -0.5) | 139.6 (77.8 to 204.8)  | 73.7 (56.3 to 92)      | -1.2 (-1.5 to -0.5) |
| Panama                   | 50.6 (36.9 to 69.2)    | 53.3 (39 to 71.2)      | 0.3 (0 to 0.7)      | 3.1 (2.7 to 3.9)    | 4.4 (2.7 to 5.9)    | 0.2 (-0.8 to 1.2)   | 87.2 (77.9 to 109.8)   | 118.1 (73.2 to 160.6)  | 0.2 (-0.7 to 1.2)   |
| Papua New Guinea         | 18.9 (13.8 to 25.6)    | 19.9 (14.4 to 27)      | 0.1 (-0.1 to 0.3)   | 3 (1.7 to 5.1)      | 3.3 (2 to 5.1)      | -0.2 (-0.7 to 0.7)  | 91 (46.3 to 160.6)     | 100.5 (55.2 to 165.7)  | -0.2 (-0.7 to 0.7)  |
| Paraguay                 | 34.9 (24.8 to 47.7)    | 38.5 (28.1 to 53)      | 0.4 (0 to 0.7)      | 4.4 (2.6 to 5.7)    | 3.1 (2.3 to 4.3)    | -0.7 (-1.2 to 0.3)  | 97.9 (64.6 to 121.7)   | 69.2 (50.9 to 99.5)    | -0.7 (-1.1 to 0.2)  |
| Peru                     | 18.6 (13.3 to 25.7)    | 22.4 (16.6 to 29.4)    | 0.4 (0.2 to 0.8)    | 1.8 (1.3 to 2.3)    | 1.1 (0.7 to 1.6)    | -1 (-1.4 to -0.3)   | 58.4 (37.9 to 75.1)    | 31.4 (22.3 to 44.8)    | -1 (-1.4 to -0.2)   |
| Philippines              | 36.1 (27.3 to 46.6)    | 36.4 (27.5 to 46.5)    | 0 (0 to 0.1)        | 4.5 (1.5 to 6.1)    | 5 (1.9 to 6.9)      | 0.8 (0 to 1.9)      | 63.8 (34.7 to 79)      | 93.9 (53.3 to 120.1)   | 1.7 (0.2 to 3.1)    |
| Poland                   | 163.2 (117.8 to 220)   | 180.7 (134.7 to 237.6) | 0.3 (0 to 0.6)      | 15.7 (12.4 to 17.2) | 14.5 (9 to 17.8)    | 0 (-0.6 to 0.4)     | 310.4 (265.7 to 343.9) | 268.4 (185.8 to 330.9) | 0.1 (-0.5 to 0.6)   |
| Portugal                 | 52.8 (39.6 to 69.3)    | 35.9 (27.9 to 46.6)    | -0.6 (-0.8 to -0.4) | 4.2 (3.3 to 4.6)    | 2.5 (1.9 to 3)      | -0.6 (-0.9 to -0.3) | 86.4 (71.9 to 95.8)    | 52.6 (37.3 to 61.1)    | -0.6 (-1 to -0.3)   |
| Puerto Rico              | 50.9 (38.4 to 67)      | 45.3 (34.2 to 60)      | -0.2 (-0.4 to 0)    | 5.5 (3.4 to 6.8)    | 2.2 (1.6 to 3.2)    | -1.2 (-1.5 to -0.6) | 139.7 (98 to 167.4)    | 58.8 (43.1 to 88.5)    | -1.2 (-1.5 to -0.6) |
| Qatar                    | 67.9 (53.4 to 85.7)    | 65.9 (49.1 to 86.2)    | -0.1 (-0.5 to 0.3)  | 4.5 (2.7 to 6.7)    | 3.6 (2.3 to 5.1)    | -0.7 (-1.3 to 0.4)  | 118.4 (82.4 to 161.8)  | 68.8 (48.2 to 93.5)    | -1 (-1.4 to -0.2)   |



|                                  |                        |                        |                     |                     |                     |                     |                        |                        |                     |
|----------------------------------|------------------------|------------------------|---------------------|---------------------|---------------------|---------------------|------------------------|------------------------|---------------------|
| Republic of Korea                | 35.4 (26.7 to 46.3)    | 34.1 (26.3 to 44)      | -0.1 (-0.3 to 0.2)  | 2 (1.4 to 2.8)      | 1.3 (0.9 to 1.6)    | -1 (-1.4 to -0.5)   | 56.9 (42 to 85)        | 32.9 (24.5 to 38.8)    | -1.1 (-1.4 to -0.6) |
| Republic of Moldova              | 29.1 (21.1 to 39.8)    | 53.9 (38.6 to 74.6)    | 1.7 (1.3 to 2.2)    | 3.1 (2.6 to 5.1)    | 6.2 (4.4 to 8)      | 11.8 (1.9 to 22.1)  | 117.6 (99.9 to 180.5)  | 213.5 (152.9 to 277.1) | 10.7 (1.8 to 19.5)  |
| Romania                          | 105 (75.6 to 142)      | 88.1 (60 to 122.8)     | -0.3 (-0.6 to 0)    | 29.1 (17.7 to 35.6) | 19.6 (13.1 to 24.8) | -0.7 (-1.1 to -0.3) | 500.6 (352.6 to 595.6) | 391.1 (248.1 to 513.4) | -0.6 (-1 to -0.1)   |
| Russian Federation               | 80.4 (59.4 to 107.4)   | 74.2 (54.2 to 100.9)   | -0.2 (-0.2 to -0.1) | 13.2 (10 to 22.5)   | 25.2 (15.3 to 31.5) | 2.6 (-0.5 to 5.1)   | 448.6 (325.4 to 796.7) | 905.9 (577.6 to 1133)  | 3.1 (-0.4 to 6.7)   |
| Rwanda                           | 231.3 (152.4 to 329.5) | 236.8 (156 to 332.4)   | 0.1 (-0.2 to 0.3)   | 5.8 (3.6 to 8.2)    | 4 (2.7 to 5.4)      | -1 (-1.4 to -0.2)   | 204.8 (128.7 to 287.3) | 139.3 (96.3 to 188.4)  | -1 (-1.4 to -0.2)   |
| Saint Kitts and Nevis            | 69.2 (52.3 to 91.9)    | 71.9 (54.5 to 95.1)    | 0.1 (-0.1 to 0.4)   | 14.2 (12.2 to 16.5) | 12.1 (9.4 to 14.8)  | 0 (-0.7 to 0.8)     | 377.4 (323.3 to 442.2) | 292.7 (218.6 to 375.5) | -0.2 (-0.8 to 0.6)  |
| Saint Lucia                      | 68.1 (50.7 to 89.5)    | 71.9 (53.3 to 93.6)    | 0.1 (-0.1 to 0.4)   | 11.2 (9.2 to 14.1)  | 10.2 (7.9 to 12.5)  | 0 (-0.7 to 0.8)     | 281.1 (233.6 to 356.3) | 259 (200.7 to 318.6)   | 0 (-0.7 to 0.8)     |
| Saint Vincent and the Grenadines | 21.2 (15.6 to 28.5)    | 24.1 (17.6 to 32.1)    | 0.3 (0 to 0.6)      | 3.3 (2.8 to 4.5)    | 4.3 (3.3 to 5.1)    | 1.4 (0.2 to 2.6)    | 89.8 (77.4 to 117.8)   | 110.7 (84.6 to 135)    | 1.2 (0.1 to 2.3)    |
| Samoa                            | 28.2 (20.8 to 37.7)    | 28.5 (20.9 to 38.1)    | 0 (-0.2 to 0.3)     | 3.7 (2.5 to 4.9)    | 3.3 (2 to 4.5)      | -0.5 (-0.9 to 0.2)  | 102.5 (68.8 to 142.4)  | 92.3 (55.9 to 129.6)   | -0.4 (-0.9 to 0.3)  |
| San Marino                       | 133.8 (101.1 to 174.6) | 97.5 (72.9 to 126.4)   | -0.5 (-0.7 to -0.4) | 7.1 (4.6 to 9.3)    | 5.7 (3.6 to 8)      | -0.5 (-1.1 to 0.5)  | 134 (94.2 to 167.7)    | 100.4 (65.7 to 147.9)  | -0.5 (-1.1 to 0.4)  |
| Sao Tome and Principe            | 236.3 (153.8 to 333.8) | 268 (173.6 to 377.6)   | 0.3 (0 to 0.5)      | 6.4 (3.5 to 9.2)    | 5.3 (3.7 to 6.8)    | -0.6 (-1.1 to 0.3)  | 175.2 (103.5 to 244.6) | 147.6 (107.5 to 192.5) | -0.6 (-1.1 to 0.4)  |
| Saudi Arabia                     | 64.6 (48 to 85.7)      | 77.9 (58 to 102.8)     | 0.3 (0.1 to 0.7)    | 7.8 (5.2 to 11.8)   | 5.1 (3.2 to 6.5)    | -1 (-1.5 to -0.1)   | 188.2 (133.9 to 276.7) | 121 (80 to 154.3)      | -0.9 (-1.4 to -0.1) |
| Senegal                          | 270.2 (178 to 370.9)   | 271.6 (179.9 to 378.1) | 0 (-0.2 to 0.2)     | 7.3 (3.8 to 10.5)   | 5.2 (3.6 to 7)      | -0.9 (-1.3 to -0.2) | 195.7 (111.6 to 272.2) | 146.8 (104.3 to 191.2) | -0.9 (-1.2 to -0.1) |
| Serbia                           | 84 (58.9 to 114.6)     | 52.5 (36.4 to 70.7)    | -0.7 (-1 to -0.3)   | 20.4 (12.7 to 26.7) | 20.1 (10.7 to 28.1) | 0.5 (-0.4 to 1.9)   | 333.7 (236.3 to 414.9) | 298.3 (168.6 to 414.9) | 0.3 (-0.6 to 1.5)   |
| Seychelles                       | 74.6 (55.2 to 100.3)   | 69.9 (52.5 to 93.2)    | -0.1 (-0.4 to 0.2)  | 9.8 (7.6 to 12.4)   | 8.2 (6.5 to 10.5)   | -0.5 (-0.9 to 0)    | 259.6 (203.3 to 333.5) | 217.8 (171.8 to 277.4) | -0.5 (-0.9 to 0)    |
| Sierra Leone                     | 245.6 (159.8 to 350.4) | 256.6 (167.6 to 364.3) | 0.1 (-0.1 to 0.4)   | 7.8 (4.1 to 11.5)   | 5.6 (3.7 to 8)      | -0.9 (-1.3 to 0)    | 210.3 (118.3 to 304.1) | 161.7 (112.1 to 231.4) | -0.8 (-1.2 to 0.1)  |
| Singapore                        | 38.7 (29.7 to 50.2)    | 30 (23.1 to 39)        | -0.4 (-0.6 to -0.3) | 3.6 (3 to 5)        | 1.5 (1.1 to 2.1)    | -1.4 (-1.6 to -1.2) | 118.8 (97.3 to 162.8)  | 42.4 (32.3 to 54.5)    | -1.4 (-1.7 to -1.2) |
| Slovakia                         | 55.1 (40.1 to 73.7)    | 73.4 (53.4 to 97.3)    | 0.8 (0.2 to 1.7)    | 4.8 (3.5 to 9)      | 5.3 (3.4 to 8.5)    | 1.1 (-0.3 to 3.1)   | 138.7 (114.6 to 200.8) | 142.2 (91.8 to 195.9)  | 0.8 (-0.4 to 2.5)   |

|                            |                        |                        |                     |                      |                    |                     |                          |                        |                     |
|----------------------------|------------------------|------------------------|---------------------|----------------------|--------------------|---------------------|--------------------------|------------------------|---------------------|
| Slovenia                   | 246.6 (171.7 to 338.5) | 171.1 (127.2 to 221.5) | -0.6 (-0.9 to -0.3) | 68.9 (14.9 to 100.6) | 14.6 (8.4 to 18.8) | -1.7 (-1.8 to -1)   | 1010.1 (306.4 to 1468.6) | 200.2 (144.7 to 255)   | -1.7 (-1.8 to -1.1) |
| Solomon Islands            | 16.6 (11.8 to 22.8)    | 16.2 (11.6 to 22.1)    | 0 (-0.3 to 0.2)     | 4.1 (2.2 to 6.7)     | 3.9 (2.2 to 6.2)   | -0.4 (-0.8 to 0.3)  | 122.4 (61.9 to 215.1)    | 116.3 (60.5 to 199.8)  | -0.4 (-0.9 to 0.3)  |
| Somalia                    | 224.9 (146.7 to 326.9) | 234.2 (155 to 330.7)   | 0.1 (-0.1 to 0.4)   | 5.2 (3.2 to 7.6)     | 4.2 (2.7 to 6.3)   | -0.4 (-1.1 to 0.7)  | 193.5 (117.7 to 284.1)   | 155.7 (104.4 to 222.9) | -0.4 (-1 to 0.6)    |
| South Africa               | 274.2 (183.3 to 384.4) | 244.3 (162.6 to 337.6) | -0.2 (-0.3 to -0.1) | 11.7 (9 to 14.3)     | 10.6 (8.8 to 13.3) | -0.4 (-0.7 to 0)    | 284.8 (230.1 to 332)     | 231 (192.8 to 288.3)   | -0.5 (-0.8 to -0.1) |
| South Sudan                | 248.5 (164.3 to 355.6) | 258.5 (173.6 to 364.3) | 0.1 (-0.2 to 0.3)   | 4.6 (2.4 to 6.7)     | 3.2 (1.9 to 4.8)   | -0.7 (-1.2 to 0.1)  | 182.7 (100.9 to 261.9)   | 127 (80.1 to 187.3)    | -0.7 (-1.2 to 0.1)  |
| Spain                      | 130.3 (97 to 169.5)    | 87.5 (65.5 to 113.4)   | -0.6 (-0.8 to -0.4) | 10.7 (6.6 to 12.2)   | 5.3 (4.3 to 6.2)   | -1.1 (-1.3 to -0.8) | 180.1 (143.4 to 199.1)   | 101.1 (81.8 to 117.2)  | -1 (-1.1 to -0.8)   |
| Sri Lanka                  | 123 (91.1 to 163.9)    | 131.6 (96.7 to 173.8)  | 0.1 (-0.1 to 0.4)   | 15.1 (9.5 to 18.4)   | 7.8 (5.2 to 12.2)  | -0.2 (-1 to 1.2)    | 363.4 (242.4 to 435.9)   | 206.6 (141.4 to 304.2) | -0.1 (-0.9 to 1.1)  |
| Sudan                      | 14.8 (10.8 to 20.1)    | 16.4 (12 to 21.7)      | 0.2 (0 to 0.5)      | 3.4 (1.7 to 6.2)     | 2.4 (1.5 to 3.9)   | -0.9 (-1.3 to -0.1) | 101 (44.8 to 224.8)      | 68.1 (41.2 to 116.9)   | -0.9 (-1.4 to 0.1)  |
| Suriname                   | 38.6 (29.3 to 51.7)    | 41.8 (31.8 to 54.9)    | 0.2 (-0.1 to 0.4)   | 5.2 (4.2 to 7.4)     | 5.2 (3.9 to 6.6)   | 0.1 (-0.5 to 1.1)   | 156.2 (125.2 to 208.4)   | 147.3 (109.9 to 187.8) | 0.1 (-0.6 to 1)     |
| Sweden                     | 131.2 (101.5 to 167.2) | 126.5 (96.2 to 166.4)  | -0.1 (-0.3 to 0.2)  | 4.6 (3.7 to 7)       | 2.9 (2.2 to 5.3)   | -0.6 (-1 to 0)      | 135.6 (106.1 to 157.2)   | 74.6 (61.6 to 102.6)   | -0.7 (-1 to -0.3)   |
| Switzerland                | 68.6 (51.3 to 88.9)    | 45.8 (37.3 to 56)      | -0.7 (-0.9 to -0.4) | 4.8 (3.8 to 6)       | 2.6 (2 to 3.8)     | -1 (-1.3 to -0.6)   | 107.6 (85 to 128.9)      | 49.8 (40.6 to 68.4)    | -1.1 (-1.3 to -0.8) |
| Syrian Arab Republic       | 22.8 (16.8 to 30.5)    | 25.9 (19.1 to 34.7)    | 0.3 (0 to 0.5)      | 3.5 (2.4 to 5.4)     | 2.5 (1.8 to 4)     | -0.8 (-1.2 to -0.1) | 107.1 (71.2 to 168.7)    | 66.6 (45.2 to 105)     | -0.8 (-1.3 to -0.2) |
| Taiwan (Province of China) | 51.3 (38.2 to 66.5)    | 45.6 (35.2 to 56.9)    | -0.2 (-0.4 to 0.1)  | 2.8 (2.1 to 3.1)     | 1.4 (1 to 1.9)     | -1.1 (-1.3 to -0.6) | 67.8 (55.8 to 75.8)      | 40.3 (30.3 to 53.3)    | -0.8 (-1.2 to -0.4) |
| Tajikistan                 | 4.8 (3.6 to 6.3)       | 4.7 (3.5 to 6.2)       | 0 (-0.2 to 0.2)     | 0.9 (0.6 to 1.2)     | 1.1 (0.7 to 1.5)   | 0.2 (-0.4 to 1.3)   | 30.2 (21.8 to 37.4)      | 32.4 (21.5 to 42.5)    | 0.1 (-0.5 to 1)     |
| Thailand                   | 18.8 (13.7 to 25)      | 20.5 (15 to 27.2)      | 0.2 (0 to 0.4)      | 0.7 (0.4 to 1.2)     | 0.6 (0.4 to 0.9)   | -0.5 (-1.1 to 0.7)  | 17.8 (11.5 to 32.2)      | 19.7 (14 to 26.4)      | -0.2 (-1 to 1)      |
| Timor-Leste                | 28.7 (21.6 to 38.1)    | 34.3 (25.5 to 45.4)    | 0.4 (0.1 to 0.7)    | 2.9 (1.8 to 4.3)     | 3.9 (2.7 to 5.4)   | 0.3 (-0.6 to 1.8)   | 62.7 (38.5 to 113.7)     | 80.6 (55.7 to 119.3)   | 0.3 (-0.6 to 1.8)   |
| Togo                       | 234.8 (153.4 to 332)   | 236.8 (154.8 to 334.5) | 0 (-0.2 to 0.3)     | 8.2 (4.5 to 11.5)    | 5.4 (3.8 to 7.3)   | -0.9 (-1.3 to -0.2) | 215.3 (124.1 to 293.7)   | 152.1 (110.8 to 205)   | -0.9 (-1.2 to -0.1) |
| Tokelau                    | 28 (20.7 to 37.3)      | 30.3 (22.4 to 40.3)    | 0.2 (0 to 0.4)      | 3.5 (2.2 to 4.8)     | 2.9 (1.7 to 4)     | -0.7 (-1.1 to 0)    | 97.4 (62.1 to 138.6)     | 81.3 (47.8 to 115.4)   | -0.7 (-1.1 to 0.1)  |
| Tonga                      | 28.2 (20.6 to 38.1)    | 28 (20.7 to 38)        | 0 (-0.2 to 0.3)     | 1.8 (1.3 to 2.4)     | 1.7 (1.1 to 2.2)   | -0.3 (-0.8 to 0.4)  | 52.9 (39.9 to 68.8)      | 50.3 (34.3 to 68)      | -0.3 (-0.8 to 0.5)  |

|                                    |                        |                        |                     |                     |                     |                     |                        |                         |                     |
|------------------------------------|------------------------|------------------------|---------------------|---------------------|---------------------|---------------------|------------------------|-------------------------|---------------------|
| Trinidad and Tobago                | 35 (26.5 to 45.8)      | 35.1 (26.4 to 47)      | 0 (-0.3 to 0.3)     | 5.4 (4.3 to 6.9)    | 4.3 (3.2 to 5.9)    | -0.2 (-0.8 to 0.9)  | 149.7 (124 to 185.4)   | 124.5 (89.1 to 170.4)   | -0.1 (-0.8 to 0.9)  |
| Tunisia                            | 23.1 (17.1 to 30.5)    | 25.2 (19 to 33.1)      | 0.2 (0 to 0.4)      | 2.7 (2 to 4)        | 1.9 (1.3 to 2.9)    | -0.7 (-1.2 to -0.1) | 75 (54 to 113.1)       | 47 (31.7 to 74.3)       | -0.8 (-1.2 to -0.1) |
| Turkey                             | 34.9 (26.7 to 45.4)    | 28.7 (23.3 to 35.3)    | -0.4 (-0.7 to -0.1) | 2.7 (1.9 to 4.1)    | 1.4 (1 to 2.3)      | -1.2 (-1.5 to -0.6) | 90.3 (64.5 to 128.2)   | 42.5 (33.8 to 57.6)     | -1.2 (-1.5 to -0.6) |
| Turkmenistan                       | 39.4 (29.2 to 53.1)    | 41.5 (30.5 to 56.2)    | 0.1 (-0.1 to 0.4)   | 18.7 (13.4 to 23.5) | 14.7 (10.6 to 22.8) | 0 (-0.7 to 1.4)     | 651.9 (461.4 to 813)   | 541.8 (398.4 to 795.2)  | 0.2 (-0.6 to 1.5)   |
| Tuvalu                             | 22.4 (16.5 to 30.6)    | 24.4 (17.8 to 33.3)    | 0.2 (-0.1 to 0.4)   | 4.4 (2.6 to 6.4)    | 3.7 (2.2 to 5.1)    | -0.7 (-1.1 to 0.1)  | 128.6 (72.7 to 200.3)  | 104.9 (63.4 to 150.6)   | -0.7 (-1.2 to 0.1)  |
| Uganda                             | 178.4 (108.8 to 262.6) | 174.6 (106.9 to 256.2) | 0 (-0.2 to 0.2)     | 4.1 (2.8 to 5.4)    | 3.6 (2.2 to 4.8)    | -0.6 (-1 to 0.1)    | 146.3 (97.8 to 191.7)  | 126.6 (77.5 to 175.6)   | -0.5 (-1 to 0.2)    |
| Ukraine                            | 77.9 (58.2 to 102.3)   | 72.5 (53.9 to 94.8)    | -0.1 (-0.3 to 0)    | 17 (13.3 to 21.5)   | 23.9 (18.2 to 31.8) | 0.9 (0 to 2.1)      | 555.1 (436.6 to 707.8) | 848.3 (646.3 to 1167.5) | 1.2 (0.3 to 2.5)    |
| United Arab Emirates               | 21 (16 to 27.7)        | 21 (15.7 to 27.6)      | 0 (-0.2 to 0.2)     | 2.8 (1.4 to 5.7)    | 1.7 (0.8 to 3.5)    | -1 (-1.4 to -0.4)   | 79.4 (43.1 to 152.6)   | 46.3 (24.6 to 90.6)     | -1 (-1.3 to -0.4)   |
| United Kingdom                     | 50.4 (39.2 to 63.9)    | 41.5 (33.5 to 50.9)    | -0.4 (-0.5 to -0.2) | 3.2 (2.7 to 5.6)    | 2.9 (2.5 to 4)      | -0.2 (-0.7 to 0.1)  | 93.6 (81 to 121.5)     | 69 (61.2 to 81.9)       | -0.5 (-0.8 to -0.2) |
| United Republic of Tanzania        | 259.8 (170.3 to 358.4) | 288.3 (187.6 to 400.7) | 0.2 (0 to 0.5)      | 5.2 (3.5 to 6.5)    | 4.2 (2.6 to 5.9)    | -0.4 (-1 to 0.5)    | 193.3 (133.2 to 248.6) | 161.3 (103.8 to 239.1)  | -0.4 (-0.9 to 0.6)  |
| United States of America           | 197.1 (152.9 to 256.4) | 197.4 (157.4 to 246.2) | -0.1 (-0.3 to 0.2)  | 8.3 (6.3 to 9.2)    | 6 (5.3 to 6.8)      | -0.7 (-0.9 to -0.3) | 238.2 (183.4 to 264.4) | 161.3 (145.2 to 184.8)  | -0.7 (-0.9 to -0.4) |
| United States Virgin Islands       | 53.5 (40.6 to 70.2)    | 50.6 (37.7 to 67)      | -0.1 (-0.3 to 0.1)  | 9.9 (7.7 to 13.5)   | 10 (7.1 to 12.7)    | 0.1 (-0.6 to 0.9)   | 268 (207.3 to 362.4)   | 249.7 (173.1 to 328.1)  | -0.1 (-0.7 to 0.8)  |
| Uruguay                            | 139.8 (98.4 to 191.9)  | 110.5 (79.3 to 149.8)  | -0.4 (-0.6 to -0.2) | 11.8 (7.9 to 14.2)  | 5.7 (4.6 to 7.9)    | -1.1 (-1.4 to -0.5) | 277.3 (192.8 to 332.3) | 129.9 (108.6 to 179.5)  | -1.1 (-1.4 to -0.5) |
| Uzbekistan                         | 2.1 (1.5 to 2.7)       | 2.2 (1.6 to 2.9)       | 0.1 (-0.1 to 0.4)   | 0.6 (0.3 to 1.3)    | 1.3 (1.1 to 1.8)    | 1.5 (-0.2 to 6)     | 20.3 (11.2 to 41.4)    | 44.3 (34.1 to 55.6)     | 1.5 (-0.2 to 4.7)   |
| Vanuatu                            | 23.4 (17.1 to 32)      | 22.1 (16.2 to 29.9)    | -0.1 (-0.3 to 0.2)  | 3.6 (2.1 to 5.3)    | 3.7 (2.1 to 5.5)    | -0.2 (-0.7 to 0.6)  | 98.9 (57.8 to 153.6)   | 110.1 (60.5 to 167.1)   | -0.1 (-0.7 to 0.7)  |
| Venezuela (Bolivarian Republic of) | 19.2 (13.2 to 27.3)    | 18 (12.4 to 25.6)      | 0 (-0.3 to 0.4)     | 5.2 (2.4 to 6.7)    | 2.9 (2 to 3.9)      | -1.1 (-1.4 to -0.4) | 113.7 (65.1 to 141.5)  | 62.5 (46.2 to 81.7)     | -1.1 (-1.4 to -0.4) |
| Viet Nam                           | 44 (32.8 to 56.9)      | 51.3 (40 to 66)        | 0.4 (0.1 to 0.8)    | 4.4 (3.1 to 6.4)    | 4.1 (3 to 5.5)      | 0 (-0.7 to 1.3)     | 97.8 (71.2 to 158.2)   | 87.7 (63.4 to 132)      | 0.1 (-0.6 to 1.4)   |
| Yemen                              | 13.3 (9.8 to 17.8)     | 14.6 (10.8 to 19.4)    | 0.2 (-0.1 to 0.4)   | 3.3 (1.6 to 6.4)    | 2.5 (1.5 to 4.4)    | -0.8 (-1.3 to 0.1)  | 89.6 (43 to 199.1)     | 66 (39.3 to 121)        | -0.8 (-1.3 to 0.2)  |

|          |                        |                        |                   |                   |                     |                   |                        |                        |                   |
|----------|------------------------|------------------------|-------------------|-------------------|---------------------|-------------------|------------------------|------------------------|-------------------|
| Zambia   | 243.6 (154.2 to 346.2) | 259.1 (169.2 to 369.5) | 0.1 (-0.1 to 0.4) | 4 (2.4 to 5.3)    | 4.7 (2.8 to 6.5)    | 0.2 (-0.5 to 1.6) | 153.5 (93.7 to 210.2)  | 161.5 (101.7 to 225.1) | 0.1 (-0.6 to 1.4) |
| Zimbabwe | 227.6 (159 to 311)     | 227 (148.2 to 328.2)   | 0 (-0.4 to 0.5)   | 14.8 (11 to 17.9) | 15.2 (10.9 to 19.4) | 0.2 (-0.5 to 1)   | 328.9 (240.4 to 393.7) | 348.8 (249 to 445.2)   | 0.2 (-0.4 to 1.1) |

**Table S2.** Age-standardized prevalence, death, DALYs rates of the alcoholic cardiomyopathy, and their percentage changes with 95% UIs from 1990 to 2019 at national level, both sexes.

| Countries           | Prevalence          |                     |                     | Deaths           |                  |                     | DALYs               |                     |                      |
|---------------------|---------------------|---------------------|---------------------|------------------|------------------|---------------------|---------------------|---------------------|----------------------|
|                     | 1990 age-           | 2019                | Percentage change   | 1990 age-        | 2019             | Percentage change   | 1990 age-           | 2019                | Percentage change    |
|                     | standardized        | age-standardized    | in age-standardized | standardized     | age-standardized | in age-standardized | standardized        | age-standardized    | in age-standardized  |
|                     | rate per 100,000    | rate per 100,000    | rates, 1990–2019    | rate per 100,000 | rate per 100,000 | rates, 1990–2019    | rate per 100,000    | rate per 100,000    | rates, 1990–2019 (%) |
|                     | people              | people              | (%)                 | people           | people           | (%)                 | people              | people              |                      |
| Afghanistan         | 1.5 (1 to 1.9)      | 1.6 (1.1 to 2.1)    | 0.1 (0 to 0.2)      | 0.8 (0.2 to 1.8) | 0.4 (0.1 to 0.8) | -0.5 (-0.7 to -0.1) | 20.7 (4.8 to 41.6)  | 9.8 (2.9 to 17.7)   | -0.5 (-0.7 to -0.1)  |
| Albania             | 12 (8.7 to 16.4)    | 10.1 (7.2 to 13.8)  | -0.2 (-0.3 to 0)    | 1.4 (1 to 1.8)   | 0.7 (0.4 to 1.3) | -0.5 (-0.7 to -0.1) | 32.2 (23.7 to 44.2) | 19.6 (11.1 to 36)   | -0.4 (-0.6 to 0)     |
| Algeria             | 1.4 (1 to 1.9)      | 1.5 (1.1 to 2)      | 0 (-0.1 to 0.2)     | 0.2 (0.1 to 0.4) | 0.1 (0 to 0.2)   | -0.5 (-0.8 to -0.1) | 5.6 (3.3 to 8.7)    | 2.8 (1.4 to 4.5)    | -0.5 (-0.7 to 0)     |
| American Samoa      | 3.3 (2.4 to 4.4)    | 3.2 (2.3 to 4.4)    | 0 (-0.1 to 0.1)     | 0.6 (0.4 to 0.8) | 0.2 (0.1 to 0.2) | -0.7 (-0.8 to -0.4) | 16.2 (10.3 to 22.4) | 4.4 (3.1 to 6.6)    | -0.7 (-0.8 to -0.4)  |
| Andorra             | 35.9 (26.4 to 46.8) | 25.9 (18.9 to 34)   | -0.3 (-0.4 to -0.2) | 1.9 (1.2 to 3)   | 1.1 (0.8 to 1.5) | -0.4 (-0.7 to -0.1) | 53.2 (34.5 to 80.7) | 30.4 (21.5 to 42.1) | -0.4 (-0.7 to -0.1)  |
| Angola              | 1.6 (1 to 2.4)      | 1.7 (1.1 to 2.6)    | 0.1 (0 to 0.2)      | 0.1 (0.1 to 0.2) | 0.1 (0 to 0.1)   | -0.4 (-0.6 to 0.3)  | 4.2 (2 to 7.4)      | 2.8 (1.7 to 4.5)    | -0.3 (-0.6 to 0.3)   |
| Antigua and Barbuda | 3.1 (2.2 to 4.1)    | 3.2 (2.3 to 4.4)    | 0 (-0.2 to 0.2)     | 0.3 (0.2 to 0.4) | 0.5 (0.3 to 0.7) | 0.9 (-0.1 to 2.1)   | 7.9 (5.8 to 11.7)   | 14.4 (8.3 to 19.3)  | 0.8 (-0.1 to 1.9)    |
| Argentina           | 1.3 (0.7 to 2.1)    | 2.6 (1.6 to 4)      | 1 (0.5 to 1.8)      | 1.1 (0.8 to 1.5) | 0.2 (0.1 to 0.2) | -0.9 (-0.9 to -0.8) | 33.8 (24.6 to 45)   | 5.2 (3.9 to 6.8)    | -0.8 (-0.9 to -0.8)  |
| Armenia             | 27 (20.1 to 35.5)   | 13.6 (10.1 to 18.1) | -0.5 (-0.6 to -0.4) | 5.3 (3.6 to 6.8) | 1.4 (0.9 to 2.2) | -0.7 (-0.8 to -0.5) | 121.1 (96.2 to 151) | 31.2 (20.9 to 53.1) | -0.7 (-0.8 to -0.5)  |

|                                  |                     |                     |                     |                  |                   |                     |                        |                        |                     |
|----------------------------------|---------------------|---------------------|---------------------|------------------|-------------------|---------------------|------------------------|------------------------|---------------------|
| Australia                        | 52.6 (38.7 to 69.8) | 39 (28.5 to 52.3)   | -0.3 (-0.3 to -0.2) | 1.8 (1.4 to 2.2) | 1 (0.7 to 1.4)    | -0.4 (-0.6 to -0.2) | 56.6 (46.9 to 66.9)    | 33.8 (25.1 to 42.9)    | -0.4 (-0.6 to -0.3) |
| Austria                          | 21.4 (15.6 to 28.3) | 15.5 (11.7 to 19.9) | -0.3 (-0.4 to -0.1) | 0.3 (0.2 to 0.9) | 0.8 (0.5 to 1.1)  | 1.5 (-0.4 to 2.9)   | 9.1 (7 to 18.9)        | 19.7 (12.9 to 28)      | 1.2 (-0.3 to 2.1)   |
| Azerbaijan                       | 1.9 (1.4 to 2.5)    | 1.8 (1.3 to 2.4)    | 0 (-0.1 to 0.1)     | 0.5 (0.2 to 1.2) | 0.5 (0.2 to 1.2)  | -0.1 (-0.4 to 0.4)  | 18.1 (8.4 to 43.6)     | 15.3 (6.9 to 40.9)     | -0.2 (-0.5 to 0.3)  |
| Bahamas                          | 7.2 (5.2 to 9.8)    | 7.1 (5.2 to 9.8)    | 0 (-0.1 to 0.1)     | 1.7 (1.3 to 2.4) | 2.1 (1.5 to 2.7)  | 0.2 (-0.2 to 0.8)   | 55.6 (41.8 to 78.1)    | 67.5 (48.5 to 88.6)    | 0.2 (-0.2 to 0.8)   |
| Bahrain                          | 4.8 (3.6 to 6.4)    | 4.9 (3.7 to 6.6)    | 0 (-0.1 to 0.1)     | 0.5 (0.3 to 0.8) | 0.3 (0.2 to 0.4)  | -0.4 (-0.7 to 0.1)  | 9.6 (6.4 to 16.4)      | 5.3 (3.4 to 7.9)       | -0.4 (-0.7 to 0)    |
| Bangladesh                       | 0.7 (0.5 to 0.9)    | 0.7 (0.5 to 1)      | 0.1 (-0.1 to 0.2)   | 0.2 (0.1 to 0.4) | 0.1 (0.1 to 0.2)  | -0.3 (-0.7 to 0.5)  | 5.8 (2.3 to 9.9)       | 3.8 (1.9 to 6.3)       | -0.3 (-0.7 to 0.5)  |
| Barbados                         | 16.3 (12.1 to 21.4) | 17.8 (13.1 to 24)   | 0.1 (0 to 0.2)      | 1.4 (1.1 to 1.8) | 1.8 (1.3 to 2.3)  | 0.3 (-0.1 to 0.8)   | 44.9 (35.6 to 58.2)    | 53.8 (38.6 to 68.8)    | 0.2 (-0.2 to 0.7)   |
| Belarus                          | 33 (23.8 to 45.2)   | 42.1 (30.6 to 57.7) | 0.3 (0.1 to 0.4)    | 6.1 (4.3 to 8.4) | 8.4 (5.7 to 11.5) | 0.4 (-0.1 to 0.9)   | 213.7 (147.1 to 299.8) | 323.8 (220.5 to 437.9) | 0.5 (0 to 1.1)      |
| Belgium                          | 18.8 (13.7 to 24.9) | 17.6 (13.9 to 21.9) | -0.1 (-0.2 to 0.2)  | 0.8 (0.6 to 1)   | 0.6 (0.4 to 0.7)  | -0.3 (-0.6 to -0.1) | 21.4 (17.1 to 25)      | 16.5 (11.8 to 21.7)    | -0.2 (-0.5 to 0)    |
| Belize                           | 3.6 (2.6 to 4.9)    | 3.9 (2.8 to 5.4)    | 0.1 (0 to 0.2)      | 0.3 (0.2 to 0.5) | 0.5 (0.3 to 0.7)  | 0.8 (0 to 2.1)      | 9.4 (5.4 to 15.1)      | 16.4 (10.9 to 20.7)    | 0.7 (0 to 2.2)      |
| Benin                            | 3.6 (2.2 to 5.7)    | 3.9 (2.3 to 6.1)    | 0.1 (-0.1 to 0.2)   | 0.4 (0.2 to 0.6) | 0.1 (0.1 to 0.2)  | -0.6 (-0.8 to -0.3) | 12.5 (6.9 to 20.4)     | 4.8 (2.9 to 8.2)       | -0.6 (-0.8 to -0.3) |
| Bermuda                          | 4.3 (3.1 to 5.7)    | 4.1 (3 to 5.5)      | 0 (-0.1 to 0.1)     | 0.3 (0.2 to 0.6) | 0.4 (0.2 to 0.5)  | 0.1 (-0.5 to 1.1)   | 9.9 (6.2 to 18.1)      | 11.1 (6.7 to 14.8)     | 0.1 (-0.5 to 1)     |
| Bhutan                           | 0.5 (0.4 to 0.8)    | 0.6 (0.4 to 0.9)    | 0.1 (0 to 0.3)      | 0.2 (0.1 to 0.4) | 0.1 (0.1 to 0.2)  | -0.3 (-0.6 to 0.5)  | 5.1 (1.9 to 9.9)       | 3.5 (2.1 to 5.6)       | -0.3 (-0.6 to 0.5)  |
| Bolivia (Plurinational State of) | 0.2 (0.1 to 0.3)    | 0.4 (0.2 to 0.7)    | 1.6 (0.7 to 3.7)    | 0.2 (0.1 to 0.4) | 0.1 (0.1 to 0.2)  | -0.5 (-0.8 to 0)    | 5.2 (2.4 to 9.4)       | 2.4 (1.5 to 3.5)       | -0.5 (-0.8 to -0.1) |
| Bosnia and Herzegovina           | 19 (13.6 to 25.9)   | 15.6 (10.8 to 21.5) | -0.2 (-0.3 to -0.1) | 2.1 (1 to 3.4)   | 1.6 (0.7 to 2.7)  | -0.2 (-0.5 to 0.2)  | 47.7 (25.1 to 74.3)    | 40.3 (17.7 to 70.1)    | -0.2 (-0.5 to 0.3)  |
| Botswana                         | 0.5 (0.4 to 0.7)    | 0.5 (0.4 to 0.8)    | 0 (-0.1 to 0.1)     | 0.1 (0 to 0.1)   | 0 (0 to 0.1)      | -0.3 (-0.6 to 0.1)  | 1.7 (1.1 to 2.6)       | 1.2 (0.7 to 1.8)       | -0.3 (-0.6 to 0.2)  |
| Brazil                           | 4.4 (2.8 to 6.3)    | 4.6 (3.1 to 6.6)    | 0.1 (0 to 0.1)      | 1.6 (1.2 to 2)   | 0.5 (0.4 to 0.6)  | -0.7 (-0.8 to -0.6) | 55.9 (43.2 to 70.4)    | 17.8 (13.7 to 22)      | -0.7 (-0.7 to -0.6) |
| Brunei Darussalam                | 11.1 (8.4 to 14.8)  | 9.2 (6.7 to 12.5)   | -0.2 (-0.3 to -0.1) | 2.5 (1.6 to 3.6) | 0.8 (0.6 to 1.2)  | -0.7 (-0.8 to -0.5) | 74.5 (51.1 to 108.1)   | 25.2 (18.8 to 35.2)    | -0.7 (-0.8 to -0.5) |
| Bulgaria                         | 0.8 (0.6 to 1.1)    | 0.7 (0.5 to 1)      | -0.1 (-0.2 to 0)    | 0.2 (0.1 to 0.3) | 0.1 (0.1 to 0.2)  | -0.5 (-0.7 to -0.2) | 6.6 (3.9 to 9.4)       | 3.4 (2.4 to 5)         | -0.5 (-0.7 to -0.1) |

|                                       |                      |                     |                     |                  |                  |                     |                     |                     |                     |
|---------------------------------------|----------------------|---------------------|---------------------|------------------|------------------|---------------------|---------------------|---------------------|---------------------|
| Burkina Faso                          | 4.4 (2.7 to 6.9)     | 4.3 (2.6 to 6.7)    | 0 (-0.1 to 0.1)     | 0.6 (0.3 to 1)   | 0.2 (0.1 to 0.4) | -0.6 (-0.8 to -0.3) | 17.6 (9.9 to 30.4)  | 7.5 (4.3 to 13)     | -0.6 (-0.8 to -0.3) |
| Burundi                               | 4 (2.5 to 5.8)       | 3.9 (2.5 to 5.8)    | 0 (-0.1 to 0.1)     | 0.2 (0.1 to 0.4) | 0.1 (0 to 0.1)   | -0.6 (-0.9 to -0.1) | 5.6 (2.4 to 12.7)   | 2.1 (1.1 to 4)      | -0.6 (-0.8 to -0.1) |
| Cabo Verde                            | 4.2 (2.6 to 6.4)     | 4.6 (2.9 to 6.8)    | 0.1 (0 to 0.2)      | 0.1 (0 to 0.1)   | 0.1 (0 to 0.1)   | 0.2 (-0.3 to 1)     | 2.5 (1.7 to 3.6)    | 2.8 (1.9 to 3.9)    | 0.1 (-0.3 to 0.7)   |
| Cambodia                              | 1 (0.7 to 1.3)       | 1.1 (0.8 to 1.4)    | 0.1 (0 to 0.2)      | 0.1 (0.1 to 0.3) | 0.1 (0.1 to 0.2) | -0.2 (-0.5 to 0.6)  | 4.3 (1.9 to 9.4)    | 3.3 (2 to 6.7)      | -0.2 (-0.6 to 0.6)  |
| Cameroon                              | 3.3 (2.3 to 4.6)     | 4.2 (2.5 to 6.5)    | 0.3 (-0.1 to 0.7)   | 0.4 (0.2 to 0.8) | 0.2 (0.1 to 0.3) | -0.5 (-0.8 to -0.1) | 14.5 (7.8 to 24.9)  | 6.9 (4 to 11.4)     | -0.5 (-0.7 to -0.1) |
| Canada                                | 81.5 (59.2 to 109.4) | 40.9 (31.4 to 52.4) | -0.5 (-0.6 to -0.4) | 0.9 (0.7 to 1.1) | 0.6 (0.5 to 0.8) | -0.3 (-0.5 to -0.1) | 32.3 (27.6 to 38.1) | 21.4 (17 to 26.4)   | -0.3 (-0.5 to -0.2) |
| Central African Republic              | 1.9 (1.2 to 2.9)     | 1.8 (1.1 to 2.7)    | -0.1 (-0.2 to 0)    | 0.2 (0.1 to 0.4) | 0.1 (0.1 to 0.3) | -0.3 (-0.6 to 0.2)  | 6.3 (2.7 to 11.8)   | 4.4 (2 to 8.7)      | -0.3 (-0.6 to 0.1)  |
| Chad                                  | 4 (2.4 to 6.1)       | 4.5 (2.6 to 6.9)    | 0.1 (0 to 0.3)      | 0.4 (0.2 to 0.8) | 0.2 (0.1 to 0.3) | -0.5 (-0.8 to -0.2) | 13.1 (6.7 to 24)    | 6.2 (3.3 to 11.1)   | -0.5 (-0.7 to -0.2) |
| Chile                                 | 6.7 (4.2 to 9.9)     | 6.2 (4.2 to 8.5)    | -0.1 (-0.2 to 0.1)  | 1 (0.8 to 1.2)   | 0.2 (0.2 to 0.3) | -0.8 (-0.8 to -0.7) | 30.2 (22.7 to 36.8) | 8.2 (6.1 to 10.5)   | -0.7 (-0.8 to -0.6) |
| China                                 | 1.6 (1.2 to 2.2)     | 1.8 (1.3 to 2.4)    | 0.1 (0.1 to 0.1)    | 0.1 (0.1 to 0.2) | 0.1 (0.1 to 0.2) | 0.2 (-0.5 to 1.8)   | 3.4 (1.9 to 6.9)    | 4.6 (3 to 6.1)      | 0.3 (-0.4 to 1.6)   |
| Colombia                              | 1.1 (0.8 to 1.4)     | 1 (0.7 to 1.3)      | -0.1 (-0.2 to 0)    | 0.4 (0.3 to 0.4) | 0 (0 to 0.1)     | -0.9 (-0.9 to -0.9) | 11 (7.8 to 12.5)    | 1.1 (0.7 to 1.7)    | -0.9 (-0.9 to -0.8) |
| Comoros                               | 1.8 (1.2 to 2.7)     | 1.9 (1.2 to 2.7)    | 0 (-0.1 to 0.1)     | 0 (0 to 0.1)     | 0 (0 to 0.1)     | -0.4 (-0.7 to 0.4)  | 1.5 (0.6 to 3)      | 1 (0.4 to 1.9)      | -0.4 (-0.7 to 0.5)  |
| Congo                                 | 1.6 (1 to 2.4)       | 1.6 (1 to 2.4)      | 0 (-0.1 to 0.2)     | 0.1 (0.1 to 0.2) | 0.1 (0 to 0.1)   | -0.5 (-0.8 to 0)    | 4.8 (2.1 to 8.5)    | 2.4 (1.4 to 3.8)    | -0.5 (-0.8 to 0)    |
| Cook Islands                          | 0.5 (0.3 to 0.7)     | 0.5 (0.3 to 0.7)    | 0 (-0.1 to 0.1)     | 0.1 (0.1 to 0.1) | 0 (0 to 0.1)     | -0.6 (-0.7 to -0.4) | 3 (2 to 4.2)        | 1.4 (0.9 to 2)      | -0.5 (-0.7 to -0.3) |
| Costa Rica                            | 2.3 (1.6 to 3.3)     | 2.4 (1.7 to 3.2)    | 0 (-0.1 to 0.2)     | 0.4 (0.3 to 0.5) | 0.2 (0.1 to 0.3) | -0.4 (-0.6 to -0.1) | 11.8 (8.7 to 15.1)  | 7.1 (4.7 to 10)     | -0.4 (-0.6 to -0.1) |
| Croatia                               | 23.8 (16.9 to 32.6)  | 18.1 (13.5 to 24)   | -0.2 (-0.4 to 0)    | 1.6 (1.3 to 2.1) | 2.6 (1.9 to 3.5) | 0.7 (0.1 to 1.3)    | 31.6 (26.3 to 46.5) | 60.2 (40.8 to 82.7) | 0.9 (0.2 to 1.7)    |
| Cuba                                  | 17.9 (12.8 to 24.3)  | 22.9 (16.2 to 31.5) | 0.3 (0.1 to 0.5)    | 0.9 (0.7 to 1.3) | 2.7 (2 to 3.4)   | 2 (0.9 to 3.1)      | 30.2 (25.1 to 42.2) | 78.8 (58.5 to 99)   | 1.6 (0.7 to 2.5)    |
| Cyprus                                | 5.7 (4 to 8)         | 5.2 (3.9 to 7)      | -0.1 (-0.2 to 0.1)  | 0.5 (0.3 to 0.8) | 0.2 (0.2 to 0.3) | -0.6 (-0.7 to -0.3) | 14.8 (9.1 to 21.5)  | 6.4 (4.7 to 9.1)    | -0.6 (-0.7 to -0.3) |
| Czechia                               | 5.8 (4 to 8.3)       | 6.6 (4.6 to 9.2)    | 0.1 (-0.1 to 0.4)   | 0.1 (0.1 to 0.2) | 0.5 (0.3 to 0.7) | 4.5 (1 to 7.7)      | 3.8 (2.9 to 6.6)    | 19.3 (11.3 to 26.3) | 4.1 (1.2 to 6.8)    |
| Côte d'Ivoire                         | 6.3 (3.7 to 9.7)     | 6.3 (3.8 to 10.1)   | 0 (-0.1 to 0.1)     | 0.6 (0.3 to 0.9) | 0.2 (0.1 to 0.3) | -0.7 (-0.8 to -0.4) | 18 (9.8 to 29.7)    | 6.4 (3.9 to 10)     | -0.6 (-0.8 to -0.3) |
| Democratic People's Republic of Korea | 2.1 (1.5 to 2.8)     | 2.1 (1.5 to 2.8)    | 0 (-0.1 to 0.1)     | 0.2 (0.1 to 0.5) | 0.2 (0.1 to 0.4) | 0 (-0.4 to 0.6)     | 7.1 (3.5 to 14.3)   | 7.4 (4.6 to 13.1)   | 0 (-0.4 to 0.7)     |

|                                  |                     |                     |                     |                  |                  |                     |                       |                       |                     |
|----------------------------------|---------------------|---------------------|---------------------|------------------|------------------|---------------------|-----------------------|-----------------------|---------------------|
| Democratic Republic of the Congo | 1.6 (1.1 to 2.4)    | 1.6 (1 to 2.4)      | 0 (-0.1 to 0.1)     | 0.1 (0.1 to 0.2) | 0.1 (0 to 0.2)   | -0.3 (-0.6 to 0.2)  | 3.5 (1.9 to 6)        | 2.5 (1.1 to 5)        | -0.3 (-0.6 to 0.3)  |
| Denmark                          | 9.3 (6.4 to 12.6)   | 6.5 (4.5 to 8.8)    | -0.3 (-0.4 to -0.2) | 0.8 (0.6 to 1)   | 0.4 (0.3 to 0.5) | -0.4 (-0.6 to -0.2) | 24 (18.1 to 30)       | 13.6 (10.1 to 16.4)   | -0.4 (-0.6 to -0.3) |
| Djibouti                         | 1.6 (1 to 2.4)      | 1.9 (1.2 to 2.7)    | 0.1 (0 to 0.3)      | 0 (0 to 0.1)     | 0 (0 to 0.1)     | -0.3 (-0.6 to 0.4)  | 1.6 (0.7 to 3.1)      | 1.2 (0.5 to 2.3)      | -0.2 (-0.6 to 0.4)  |
| Dominica                         | 2.8 (2.1 to 3.8)    | 3.1 (2.2 to 4.1)    | 0.1 (-0.1 to 0.2)   | 0.6 (0.4 to 0.9) | 0.8 (0.5 to 1.2) | 0.4 (-0.1 to 1.5)   | 17.6 (12.2 to 25.8)   | 24.8 (15.6 to 35)     | 0.4 (-0.1 to 1.4)   |
| Dominican Republic               | 3 (2.1 to 4.3)      | 3.5 (2.4 to 4.9)    | 0.1 (0 to 0.3)      | 0.2 (0.2 to 0.4) | 0.5 (0.2 to 0.7) | 1 (0.1 to 2.4)      | 7.6 (5.2 to 11.4)     | 14.7 (8.3 to 21.5)    | 0.9 (0.1 to 2.3)    |
| Ecuador                          | 0.3 (0.2 to 0.5)    | 0.4 (0.3 to 0.6)    | 0.3 (0.1 to 0.5)    | 0.1 (0.1 to 0.1) | 0 (0 to 0.1)     | -0.5 (-0.7 to -0.1) | 2.1 (1.4 to 3)        | 1.1 (0.8 to 1.5)      | -0.5 (-0.7 to -0.2) |
| Egypt                            | 2.4 (1.6 to 3.8)    | 2.8 (1.8 to 4.4)    | 0.1 (0 to 0.4)      | 0.3 (0.1 to 0.5) | 0.2 (0.1 to 0.3) | -0.4 (-0.7 to 0)    | 7.9 (4.1 to 12.8)     | 5.2 (2.7 to 8.9)      | -0.3 (-0.6 to 0.1)  |
| El Salvador                      | 0.3 (0.2 to 0.4)    | 0.4 (0.3 to 0.5)    | 0.2 (0.1 to 0.4)    | 0.1 (0 to 0.1)   | 0 (0 to 0)       | -0.6 (-0.7 to -0.3) | 1.6 (1 to 2.2)        | 0.7 (0.5 to 1.1)      | -0.5 (-0.7 to -0.3) |
| Equatorial Guinea                | 1.4 (0.9 to 2.1)    | 1.6 (1 to 2.3)      | 0.1 (0 to 0.3)      | 0.2 (0.1 to 0.3) | 0.1 (0 to 0.1)   | -0.7 (-0.9 to -0.2) | 5.7 (2.3 to 10.9)     | 1.9 (0.9 to 3.4)      | -0.7 (-0.9 to -0.1) |
| Eritrea                          | 1.3 (0.8 to 1.9)    | 1.4 (0.9 to 2.1)    | 0.1 (0 to 0.2)      | 0.1 (0 to 0.1)   | 0 (0 to 0.1)     | -0.4 (-0.7 to 0.1)  | 1.9 (0.8 to 4.3)      | 1.2 (0.6 to 2.2)      | -0.4 (-0.6 to 0.1)  |
| Estonia                          | 23.6 (16.1 to 33.7) | 29 (19.1 to 42.3)   | 0.2 (0.1 to 0.4)    | 4 (2.8 to 5.5)   | 4.4 (3 to 5.9)   | 0.1 (-0.3 to 0.6)   | 143.1 (99.8 to 193.9) | 142.5 (99.5 to 190.5) | 0 (-0.4 to 0.5)     |
| Eswatini                         | 0.5 (0.4 to 0.8)    | 0.5 (0.4 to 0.7)    | 0 (-0.1 to 0.1)     | 0.1 (0 to 0.1)   | 0 (0 to 0.1)     | -0.3 (-0.5 to 0.1)  | 1.5 (1 to 2.2)        | 1.1 (0.7 to 1.9)      | -0.2 (-0.5 to 0.3)  |
| Ethiopia                         | 1.9 (1.4 to 2.5)    | 2.2 (1.6 to 2.9)    | 0.1 (0.1 to 0.2)    | 0 (0 to 0.1)     | 0 (0 to 0)       | -0.6 (-0.8 to 0.2)  | 1.8 (0.8 to 4.3)      | 0.9 (0.4 to 1.5)      | -0.5 (-0.8 to 0.2)  |
| Fiji                             | 0.3 (0.2 to 0.4)    | 0.3 (0.2 to 0.4)    | 0 (-0.1 to 0.1)     | 0.1 (0 to 0.1)   | 0 (0 to 0)       | -0.3 (-0.6 to 0)    | 1.7 (1.2 to 2.5)      | 1.2 (0.8 to 1.7)      | -0.3 (-0.5 to 0)    |
| Finland                          | 40.6 (29.6 to 52.3) | 32.9 (24.8 to 42.1) | -0.2 (-0.3 to 0)    | 3.7 (2.6 to 4.7) | 2.5 (1.8 to 2.8) | -0.3 (-0.5 to -0.1) | 126.7 (83.9 to 162.9) | 79.5 (55.8 to 91.3)   | -0.4 (-0.5 to -0.2) |
| France                           | 28.9 (21.6 to 37.1) | 15.5 (11.6 to 19.7) | -0.5 (-0.5 to -0.4) | 1.1 (0.9 to 1.4) | 0.4 (0.3 to 0.6) | -0.6 (-0.8 to -0.5) | 33.1 (27 to 38.1)     | 13.7 (9.2 to 18.1)    | -0.6 (-0.7 to -0.5) |
| Gabon                            | 1.6 (1 to 2.4)      | 1.6 (1.1 to 2.4)    | 0 (-0.1 to 0.1)     | 0.1 (0.1 to 0.3) | 0.1 (0 to 0.1)   | -0.5 (-0.7 to 0)    | 4.7 (2.1 to 9.2)      | 2.4 (1.4 to 3.9)      | -0.5 (-0.7 to 0)    |
| Gambia                           | 5.7 (3.5 to 8.9)    | 5.6 (3.4 to 8.6)    | 0 (-0.1 to 0.1)     | 0.4 (0.2 to 0.7) | 0.2 (0.1 to 0.3) | -0.6 (-0.8 to -0.2) | 13.8 (7.2 to 23.8)    | 6 (3.5 to 9.8)        | -0.6 (-0.8 to -0.2) |
| Georgia                          | 0.8 (0.6 to 1.1)    | 0.8 (0.6 to 1.1)    | 0 (-0.1 to 0.1)     | 0.2 (0.1 to 0.2) | 0.2 (0.1 to 0.5) | 0.4 (-0.2 to 2.7)   | 4.9 (2.6 to 7.1)      | 8.8 (5.4 to 16.8)     | 0.8 (0 to 3.1)      |
| Germany                          | 44.9 (33.9 to 59)   | 40.3 (29.9 to 52.3) | -0.1 (-0.2 to 0)    | 4.3 (3.1 to 5.4) | 2.1 (1.6 to 2.4) | -0.5 (-0.7 to -0.4) | 117.3 (85.3 to 144.2) | 54.9 (44.4 to 63.5)   | -0.5 (-0.6 to -0.4) |
| Ghana                            | 5.9 (3.9 to 8.5)    | 6.5 (3.7 to 10.8)   | 0.1 (-0.2 to 0.6)   | 0.7 (0.4 to 1)   | 0.6 (0.4 to 1)   | 0 (-0.5 to 0.7)     | 21.7 (13.3 to 33.3)   | 21.3 (12.4 to 32.5)   | 0 (-0.4 to 0.7)     |

|                            |                     |                     |                     |                  |                  |                     |                      |                        |                     |
|----------------------------|---------------------|---------------------|---------------------|------------------|------------------|---------------------|----------------------|------------------------|---------------------|
| Greece                     | 1.5 (1.2 to 1.9)    | 1.2 (0.9 to 1.5)    | -0.2 (-0.3 to -0.1) | 0.1 (0.1 to 0.2) | 0.1 (0 to 0.1)   | -0.5 (-0.7 to -0.3) | 3.7 (2.7 to 5.6)     | 1.9 (1.5 to 3.5)       | -0.5 (-0.6 to -0.2) |
| Greenland                  | 26.9 (20.5 to 35.2) | 20.5 (15.4 to 26.7) | -0.2 (-0.3 to -0.1) | 1.4 (0.9 to 2)   | 1.2 (0.7 to 1.7) | -0.1 (-0.5 to 0.4)  | 48.7 (34.1 to 68.7)  | 39.1 (24.7 to 54)      | -0.2 (-0.5 to 0.3)  |
| Grenada                    | 9.5 (6.8 to 13)     | 10.6 (7.4 to 14.3)  | 0.1 (0 to 0.3)      | 1.5 (1.1 to 2.2) | 2 (1.2 to 2.5)   | 0.3 (-0.3 to 1.1)   | 46.3 (33.6 to 70)    | 59.4 (36.7 to 75.3)    | 0.3 (-0.3 to 1)     |
| Guam                       | 2.9 (2.1 to 4.1)    | 3.1 (2.2 to 4.3)    | 0 (-0.1 to 0.2)     | 0.6 (0.4 to 0.9) | 0.1 (0.1 to 0.2) | -0.8 (-0.9 to -0.7) | 16 (11.3 to 21.5)    | 3.7 (2.6 to 6)         | -0.8 (-0.8 to -0.6) |
| Guatemala                  | 0.6 (0.4 to 0.9)    | 0.8 (0.5 to 1.1)    | 0.4 (0.2 to 0.6)    | 0.1 (0.1 to 0.2) | 0.1 (0 to 0.1)   | -0.6 (-0.8 to -0.2) | 3.7 (2.2 to 5.6)     | 1.6 (1 to 2.1)         | -0.6 (-0.8 to -0.2) |
| Guinea                     | 4.1 (2.9 to 5.5)    | 4.6 (2.8 to 6.8)    | 0.1 (-0.2 to 0.4)   | 0.4 (0.2 to 0.7) | 0.2 (0.1 to 0.3) | -0.5 (-0.8 to -0.1) | 11.5 (5.5 to 21.5)   | 5.6 (3.2 to 9.6)       | -0.5 (-0.7 to -0.1) |
| Guinea-Bissau              | 5 (3 to 7.8)        | 5.3 (3.2 to 8.2)    | 0.1 (-0.1 to 0.2)   | 0.7 (0.3 to 1.4) | 0.2 (0.1 to 0.4) | -0.7 (-0.8 to -0.3) | 21 (8.1 to 43.7)     | 7.6 (4.3 to 13)        | -0.6 (-0.8 to -0.2) |
| Guyana                     | 6.7 (4.9 to 9.3)    | 5.8 (4.2 to 8.2)    | -0.1 (-0.3 to 0)    | 3 (2.4 to 3.7)   | 2.2 (1.4 to 3.1) | -0.3 (-0.5 to 0.1)  | 94.4 (73.9 to 116.7) | 69.7 (44.2 to 96.7)    | -0.3 (-0.5 to 0.1)  |
| Haiti                      | 5.2 (3.6 to 7.3)    | 5.6 (3.9 to 7.7)    | 0.1 (-0.1 to 0.2)   | 2.6 (1.1 to 4.6) | 1.6 (0.9 to 2.8) | -0.4 (-0.6 to 0.1)  | 82.1 (34.9 to 137.4) | 49.6 (25.3 to 85.1)    | -0.4 (-0.6 to 0)    |
| Honduras                   | 2 (1.2 to 3)        | 2.6 (1.7 to 3.7)    | 0.3 (0.1 to 0.6)    | 0.6 (0.3 to 0.9) | 0.4 (0.2 to 0.6) | -0.3 (-0.5 to 0.2)  | 16.4 (8.3 to 24.3)   | 11.4 (5.5 to 17.4)     | -0.3 (-0.5 to 0.1)  |
| Hungary                    | 36.4 (25.4 to 49.8) | 38.7 (25 to 54.4)   | 0.1 (-0.1 to 0.2)   | 6.5 (5.6 to 8.4) | 7.6 (5.5 to 9.8) | 0.2 (-0.3 to 0.6)   | 189 (157.4 to 236.9) | 227.4 (159.1 to 292.1) | 0.2 (-0.2 to 0.6)   |
| Iceland                    | 5.5 (4 to 7.3)      | 4.2 (3.3 to 5.5)    | -0.2 (-0.3 to -0.1) | 0.3 (0.2 to 0.4) | 0.1 (0.1 to 0.2) | -0.6 (-0.7 to -0.4) | 8.6 (6.8 to 10.7)    | 4 (3.1 to 4.9)         | -0.5 (-0.6 to -0.4) |
| India                      | 0.7 (0.5 to 1)      | 0.7 (0.5 to 1)      | 0 (0 to 0)          | 0.2 (0.1 to 0.4) | 0.1 (0.1 to 0.2) | -0.4 (-0.6 to 0)    | 5.9 (2.7 to 9.7)     | 3.8 (2.6 to 5.4)       | -0.3 (-0.5 to 0.1)  |
| Indonesia                  | 1.5 (1.2 to 2)      | 1.7 (1.3 to 2.2)    | 0.1 (0.1 to 0.2)    | 0.2 (0.1 to 0.3) | 0.1 (0.1 to 0.3) | -0.1 (-0.5 to 0.5)  | 4.8 (2.8 to 7.6)     | 4.2 (2.4 to 7.7)       | -0.1 (-0.5 to 0.4)  |
| Iran (Islamic Republic of) | 2.3 (1.7 to 3.1)    | 2.3 (1.7 to 3.1)    | 0 (0 to 0)          | 0.2 (0.1 to 0.3) | 0.1 (0.1 to 0.2) | -0.4 (-0.7 to -0.1) | 5.6 (4.1 to 8.6)     | 3.6 (2.4 to 4.7)       | -0.4 (-0.6 to 0)    |
| Iraq                       | 0.7 (0.6 to 1)      | 0.7 (0.5 to 0.9)    | 0 (-0.1 to 0.1)     | 0.1 (0.1 to 0.3) | 0 (0 to 0.1)     | -0.7 (-0.8 to -0.3) | 3.1 (1.7 to 5.7)     | 1.2 (0.8 to 1.7)       | -0.6 (-0.8 to -0.3) |
| Ireland                    | 17.8 (13.8 to 22.7) | 13.4 (10.1 to 17.1) | -0.2 (-0.3 to -0.2) | 1.2 (1 to 1.6)   | 0.7 (0.5 to 1)   | -0.4 (-0.7 to -0.2) | 35 (29.8 to 45.8)    | 20.2 (14.2 to 27.3)    | -0.4 (-0.7 to -0.2) |
| Israel                     | 1.9 (1.4 to 2.5)    | 1.5 (1.1 to 1.9)    | -0.2 (-0.3 to -0.1) | 0.2 (0.1 to 0.3) | 0 (0 to 0.1)     | -0.8 (-0.9 to -0.7) | 6.1 (4.1 to 8)       | 1.5 (1 to 2)           | -0.8 (-0.9 to -0.6) |
| Italy                      | 9.6 (6.9 to 12.9)   | 10.6 (8 to 13.9)    | 0.1 (0 to 0.3)      | 0.9 (0.7 to 1.8) | 0.1 (0.1 to 0.2) | -0.9 (-1 to -0.8)   | 24.2 (19.9 to 37.8)  | 3.8 (2.4 to 5.7)       | -0.8 (-0.9 to -0.8) |
| Jamaica                    | 3.4 (2.4 to 4.5)    | 4.1 (3 to 5.4)      | 0.2 (0.1 to 0.4)    | 0.2 (0.2 to 0.4) | 0.5 (0.4 to 0.7) | 1.2 (0.4 to 2.6)    | 7.2 (4.9 to 11.5)    | 16.1 (11.2 to 23.2)    | 1.2 (0.4 to 2.6)    |
| Japan                      | 8.1 (5.8 to 11.3)   | 7.6 (5.8 to 10)     | -0.1 (-0.2 to 0.1)  | 0.3 (0.2 to 0.3) | 0.1 (0.1 to 0.2) | -0.5 (-0.7 to -0.4) | 9.6 (7.5 to 11.5)    | 4.8 (3.4 to 6.1)       | -0.5 (-0.6 to -0.4) |



|                                  |                     |                     |                    |                  |                   |                     |                       |                        |                     |
|----------------------------------|---------------------|---------------------|--------------------|------------------|-------------------|---------------------|-----------------------|------------------------|---------------------|
| Jordan                           | 0.8 (0.6 to 1)      | 0.8 (0.6 to 1.1)    | 0.1 (0 to 0.2)     | 0.1 (0.1 to 0.1) | 0 (0 to 0)        | -0.7 (-0.8 to -0.3) | 2.3 (1.3 to 3.4)      | 1 (0.7 to 1.3)         | -0.6 (-0.7 to -0.2) |
| Kazakhstan                       | 2.6 (1.8 to 3.5)    | 2.6 (1.8 to 3.7)    | 0 (-0.1 to 0.1)    | 0.2 (0.1 to 0.8) | 1.1 (0.4 to 2)    | 3.9 (-0.2 to 12.4)  | 8.4 (3.3 to 29.1)     | 39.3 (14.9 to 73.5)    | 3.7 (-0.2 to 11.1)  |
| Kenya                            | 1.4 (0.9 to 2)      | 1.3 (0.9 to 1.9)    | 0 (-0.1 to 0)      | 0 (0 to 0.1)     | 0 (0 to 0)        | -0.1 (-0.3 to 0.2)  | 1.1 (0.5 to 2)        | 1 (0.5 to 1.7)         | -0.1 (-0.3 to 0.2)  |
| Kiribati                         | 1.2 (0.8 to 1.7)    | 1.3 (0.9 to 1.8)    | 0.1 (-0.1 to 0.2)  | 0.3 (0.2 to 0.4) | 0.2 (0.1 to 0.4)  | -0.2 (-0.5 to 0.2)  | 9.1 (4.8 to 13.4)     | 7.1 (3.3 to 10.9)      | -0.2 (-0.5 to 0.2)  |
| Kuwait                           | 1.1 (0.8 to 1.4)    | 1.1 (0.8 to 1.4)    | 0 (-0.1 to 0.1)    | 0.1 (0.1 to 0.1) | 0 (0 to 0.1)      | -0.5 (-0.7 to -0.2) | 2.3 (1.8 to 3.1)      | 1.2 (0.9 to 1.6)       | -0.5 (-0.7 to -0.2) |
| Kyrgyzstan                       | 17.5 (11.8 to 25.4) | 20.2 (13.9 to 28.9) | 0.2 (0 to 0.3)     | 4.1 (2.9 to 4.8) | 6.5 (3.3 to 8.1)  | 0.6 (0 to 1)        | 155.8 (107.9 to 182)  | 241.4 (117.4 to 301.2) | 0.5 (0 to 0.9)      |
| Lao People's Democratic Republic | 1.2 (0.9 to 1.6)    | 1.3 (1 to 1.7)      | 0.1 (0 to 0.2)     | 0.3 (0.1 to 0.6) | 0.2 (0.1 to 0.3)  | -0.4 (-0.7 to 0.4)  | 8.3 (2.9 to 16.9)     | 4.9 (2.9 to 8.8)       | -0.4 (-0.7 to 0.5)  |
| Latvia                           | 38.1 (26.4 to 53.1) | 62.2 (42 to 88.3)   | 0.6 (0.4 to 0.9)   | 3 (2.3 to 4.5)   | 16.3 (11 to 21.1) | 4.5 (1.8 to 6.9)    | 118.8 (90.5 to 175.3) | 629.3 (428.4 to 813.3) | 4.3 (1.8 to 6.6)    |
| Lebanon                          | 2.8 (2 to 3.9)      | 2.9 (2.1 to 4)      | 0 (-0.1 to 0.2)    | 0.3 (0.2 to 0.4) | 0.1 (0 to 0.2)    | -0.5 (-0.8 to -0.2) | 7.3 (4.5 to 10.7)     | 4 (1.8 to 6.3)         | -0.5 (-0.7 to 0)    |
| Lesotho                          | 0.5 (0.3 to 0.7)    | 0.5 (0.3 to 0.7)    | 0 (-0.1 to 0.1)    | 0.1 (0 to 0.1)   | 0 (0 to 0.1)      | -0.1 (-0.4 to 0.6)  | 1.4 (0.8 to 2.5)      | 1.4 (0.8 to 2.2)       | -0.1 (-0.4 to 0.9)  |
| Liberia                          | 6 (3.6 to 9.3)      | 6.6 (4 to 10.3)     | 0.1 (0 to 0.2)     | 0.5 (0.3 to 0.9) | 0.2 (0.1 to 0.3)  | -0.7 (-0.8 to -0.3) | 16.4 (9.1 to 27.8)    | 5.5 (2.7 to 10.5)      | -0.7 (-0.8 to -0.3) |
| Libya                            | 1.9 (1.4 to 2.7)    | 2.2 (1.6 to 3)      | 0.1 (0 to 0.3)     | 0.2 (0.1 to 0.3) | 0.1 (0 to 0.1)    | -0.4 (-0.7 to 0.1)  | 4.3 (2.3 to 7)        | 3 (1.5 to 4.6)         | -0.3 (-0.6 to 0.2)  |
| Lithuania                        | 18.2 (12.2 to 26.6) | 20.7 (13.7 to 30.3) | 0.1 (0 to 0.3)     | 3.2 (2.5 to 4)   | 4.7 (3.5 to 6.2)  | 0.5 (0.1 to 1)      | 121.6 (97.7 to 153.5) | 178.4 (131.8 to 232.6) | 0.5 (0.1 to 1)      |
| Luxembourg                       | 20.2 (14.8 to 27)   | 19.2 (15.2 to 24.4) | 0 (-0.2 to 0.2)    | 1.3 (0.9 to 1.5) | 0.5 (0.3 to 0.7)  | -0.6 (-0.8 to -0.4) | 34.7 (26.7 to 41.7)   | 14.1 (9 to 19.2)       | -0.6 (-0.8 to -0.4) |
| Madagascar                       | 1.8 (1.1 to 2.6)    | 1.9 (1.2 to 2.8)    | 0.1 (0 to 0.2)     | 0.1 (0 to 0.1)   | 0.1 (0 to 0.1)    | -0.3 (-0.6 to 0.2)  | 2.8 (1.5 to 4.8)      | 2 (0.9 to 3.6)         | -0.3 (-0.6 to 0.2)  |
| Malawi                           | 2.7 (1.7 to 4)      | 2.9 (1.9 to 4.3)    | 0.1 (0 to 0.2)     | 0.1 (0 to 0.1)   | 0 (0 to 0.1)      | -0.2 (-0.6 to 0.3)  | 2.2 (1.2 to 3.9)      | 1.8 (0.8 to 3.2)       | -0.2 (-0.5 to 0.3)  |
| Malaysia                         | 0.9 (0.7 to 1.2)    | 1.1 (0.8 to 1.4)    | 0.2 (0 to 0.3)     | 0.1 (0 to 0.1)   | 0 (0 to 0)        | -0.6 (-0.7 to -0.3) | 2 (1.4 to 2.9)        | 1 (0.7 to 1.4)         | -0.5 (-0.7 to -0.2) |
| Maldives                         | 1.1 (0.8 to 1.4)    | 1.1 (0.8 to 1.5)    | 0 (-0.1 to 0.2)    | 0.1 (0 to 0.2)   | 0 (0 to 0)        | -0.7 (-0.9 to -0.1) | 3.6 (1.4 to 6.5)      | 1.2 (0.6 to 1.7)       | -0.7 (-0.9 to -0.1) |
| Mali                             | 3.5 (2.1 to 5.4)    | 3.6 (2.2 to 5.7)    | 0 (-0.1 to 0.2)    | 0.3 (0.2 to 0.6) | 0.1 (0.1 to 0.2)  | -0.6 (-0.8 to -0.2) | 9.6 (5.4 to 17.9)     | 4 (2.1 to 6.9)         | -0.6 (-0.8 to -0.2) |
| Malta                            | 5.6 (4.2 to 7.3)    | 5.3 (3.9 to 6.9)    | -0.1 (-0.2 to 0.1) | 0.4 (0.3 to 0.5) | 0.2 (0.1 to 0.3)  | -0.5 (-0.7 to -0.4) | 11.3 (8.9 to 13.7)    | 5.5 (3.6 to 7.2)       | -0.5 (-0.7 to -0.4) |
| Marshall Islands                 | 1.5 (1 to 2)        | 1.5 (1 to 2)        | 0 (-0.1 to 0.1)    | 0.4 (0.2 to 0.8) | 0.2 (0.1 to 0.4)  | -0.4 (-0.6 to -0.1) | 11.3 (5.4 to 19.5)    | 6.9 (3.3 to 11.3)      | -0.4 (-0.6 to -0.1) |
| Mauritania                       | 4.1 (2.5 to 6.4)    | 4.3 (2.6 to 6.8)    | 0.1 (-0.1 to 0.2)  | 0.4 (0.2 to 0.7) | 0.1 (0 to 0.2)    | -0.7 (-0.9 to -0.5) | 12.8 (6.8 to 22.4)    | 3.5 (1.4 to 6.5)       | -0.7 (-0.9 to -0.4) |

|                                  |                      |                      |                     |                  |                  |                     |                      |                     |                     |
|----------------------------------|----------------------|----------------------|---------------------|------------------|------------------|---------------------|----------------------|---------------------|---------------------|
| Mauritius                        | 3.5 (2.6 to 4.5)     | 3.2 (2.4 to 4.2)     | -0.1 (-0.2 to 0)    | 0.4 (0.3 to 0.5) | 0.2 (0.1 to 0.3) | -0.4 (-0.6 to 0)    | 14.2 (10.1 to 19.9)  | 8.9 (6.2 to 12.5)   | -0.4 (-0.6 to 0.1)  |
| Mexico                           | 1.5 (1 to 2.2)       | 1.4 (1 to 2)         | -0.1 (-0.1 to 0)    | 0.2 (0.1 to 0.2) | 0.1 (0.1 to 0.2) | -0.3 (-0.5 to 0)    | 4.7 (3.9 to 6.1)     | 3.7 (2.8 to 5.1)    | -0.2 (-0.5 to 0.1)  |
| Micronesia (Federated States of) | 1.3 (0.9 to 1.8)     | 1.3 (0.9 to 1.8)     | 0 (-0.1 to 0.1)     | 0.4 (0.2 to 0.9) | 0.2 (0.1 to 0.4) | -0.4 (-0.7 to -0.1) | 11.6 (5 to 21.4)     | 6.6 (2.9 to 12)     | -0.4 (-0.7 to -0.1) |
| Monaco                           | 12.4 (9 to 16.2)     | 8.7 (6.4 to 11.4)    | -0.3 (-0.4 to -0.2) | 0.8 (0.6 to 1.2) | 0.4 (0.3 to 0.6) | -0.5 (-0.7 to -0.2) | 24.5 (16.5 to 34.1)  | 12.4 (8.5 to 17.6)  | -0.5 (-0.7 to -0.2) |
| Mongolia                         | 2.9 (1.9 to 4.3)     | 3.1 (2 to 4.7)       | 0.1 (-0.1 to 0.2)   | 0.7 (0.4 to 1.4) | 1 (0.6 to 1.9)   | 0.4 (-0.1 to 1.6)   | 27.8 (14.4 to 55.2)  | 41.4 (24.5 to 77.6) | 0.5 (-0.1 to 1.7)   |
| Montenegro                       | 95.3 (69.1 to 127.7) | 81.6 (59.6 to 109.6) | -0.1 (-0.2 to 0)    | 13.4 (5.3 to 23) | 9.2 (4.6 to 14)  | -0.3 (-0.5 to 0.1)  | 293.2 (145.7 to 460) | 229 (122 to 342.6)  | -0.2 (-0.5 to 0.1)  |
| Morocco                          | 2.2 (1.5 to 3)       | 2.3 (1.6 to 3.1)     | 0 (-0.1 to 0.2)     | 0.4 (0.2 to 0.9) | 0.2 (0.1 to 0.3) | -0.6 (-0.8 to -0.1) | 10.3 (4.7 to 19.7)   | 4.7 (2.6 to 7)      | -0.5 (-0.8 to -0.1) |
| Mozambique                       | 2.9 (1.9 to 4.4)     | 3.5 (2.3 to 5.1)     | 0.2 (0.1 to 0.4)    | 0.1 (0 to 0.1)   | 0.1 (0 to 0.1)   | -0.1 (-0.4 to 0.7)  | 2.2 (0.9 to 4.5)     | 2.2 (1.1 to 4.3)    | 0 (-0.3 to 0.6)     |
| Myanmar                          | 1.3 (0.9 to 1.7)     | 1.3 (1 to 1.7)       | 0 (-0.1 to 0.1)     | 0.2 (0.1 to 0.4) | 0.1 (0.1 to 0.2) | -0.5 (-0.7 to 0.1)  | 7.2 (3.1 to 13.8)    | 3.9 (2.5 to 6.7)    | -0.5 (-0.7 to 0.1)  |
| Namibia                          | 0.5 (0.4 to 0.7)     | 0.5 (0.4 to 0.7)     | 0 (-0.1 to 0.1)     | 0 (0 to 0.1)     | 0 (0 to 0.1)     | -0.3 (-0.6 to 0.3)  | 1.4 (0.8 to 2.1)     | 1.1 (0.7 to 1.7)    | -0.2 (-0.5 to 0.4)  |
| Nauru                            | 1.5 (1.1 to 2)       | 1.4 (1 to 1.9)       | 0 (-0.1 to 0.1)     | 0.3 (0.2 to 0.6) | 0.2 (0.1 to 0.4) | -0.3 (-0.6 to 0.1)  | 10.2 (4.8 to 20)     | 6.8 (3.3 to 13.7)   | -0.3 (-0.6 to 0.1)  |
| Nepal                            | 0.5 (0.4 to 0.7)     | 0.5 (0.4 to 0.7)     | 0 (-0.1 to 0.1)     | 0.2 (0.1 to 0.4) | 0.2 (0.1 to 0.3) | -0.2 (-0.6 to 0.4)  | 5.6 (2.7 to 9.6)     | 4 (2.3 to 6.5)      | -0.3 (-0.6 to 0.3)  |
| Netherlands                      | 21.3 (16.5 to 26.5)  | 15.8 (12 to 20.6)    | -0.3 (-0.4 to -0.1) | 2.1 (1.6 to 2.6) | 0.5 (0.3 to 0.8) | -0.8 (-0.9 to -0.6) | 50.8 (41.1 to 58.8)  | 14.8 (9.1 to 21.6)  | -0.7 (-0.8 to -0.6) |
| New Zealand                      | 33.9 (23.9 to 48.4)  | 26.9 (19.6 to 36)    | -0.2 (-0.3 to -0.1) | 2.1 (1.5 to 2.9) | 1.2 (0.8 to 1.4) | -0.4 (-0.6 to -0.3) | 68.6 (48.2 to 95.5)  | 37.6 (25.9 to 43.3) | -0.5 (-0.6 to -0.3) |
| Nicaragua                        | 0.7 (0.4 to 0.9)     | 0.9 (0.7 to 1.2)     | 0.4 (0.2 to 0.6)    | 0.1 (0.1 to 0.2) | 0.1 (0.1 to 0.1) | -0.4 (-0.6 to -0.1) | 3.7 (2.6 to 5)       | 1.9 (1.4 to 2.5)    | -0.5 (-0.6 to -0.3) |
| Niger                            | 3.9 (2.4 to 6.1)     | 4 (2.4 to 6.2)       | 0 (-0.1 to 0.2)     | 0.4 (0.2 to 0.8) | 0.1 (0.1 to 0.3) | -0.6 (-0.8 to -0.3) | 13.1 (6.8 to 25.1)   | 4.8 (2.3 to 9.1)    | -0.6 (-0.8 to -0.3) |
| Nigeria                          | 5.3 (3.4 to 7.8)     | 5 (3.2 to 7.4)       | -0.1 (-0.1 to 0)    | 0.6 (0.3 to 1.1) | 0.2 (0.1 to 0.3) | -0.8 (-0.9 to -0.5) | 21.3 (11.1 to 35.3)  | 5.5 (3.3 to 8.7)    | -0.7 (-0.9 to -0.5) |
| Niue                             | 1.5 (1.1 to 2.1)     | 1.6 (1.1 to 2.2)     | 0.1 (-0.1 to 0.2)   | 0.2 (0.1 to 0.3) | 0.1 (0.1 to 0.2) | -0.4 (-0.6 to -0.1) | 6.5 (4.1 to 9.9)     | 3.8 (2.3 to 5.9)    | -0.4 (-0.6 to -0.1) |
| North Macedonia                  | 11.2 (8.3 to 14.8)   | 8.6 (6.3 to 11.5)    | -0.2 (-0.3 to -0.1) | 5 (3.2 to 7)     | 0.6 (0.4 to 1.1) | -0.9 (-0.9 to -0.8) | 88.6 (64.3 to 118)   | 16.5 (9 to 26.4)    | -0.8 (-0.9 to -0.7) |

|                          |                     |                     |                     |                  |                     |                     |                        |                        |                     |
|--------------------------|---------------------|---------------------|---------------------|------------------|---------------------|---------------------|------------------------|------------------------|---------------------|
| Northern Mariana Islands | 6.1 (4.3 to 8.2)    | 5.7 (4.1 to 7.9)    | -0.1 (-0.2 to 0.1)  | 0.9 (0.6 to 1.3) | 0.2 (0.1 to 0.3)    | -0.8 (-0.9 to -0.7) | 26.3 (17.3 to 37.3)    | 6 (4.2 to 9.5)         | -0.8 (-0.9 to -0.7) |
| Norway                   | 12 (8.7 to 16.3)    | 12.5 (9.3 to 16.6)  | 0 (-0.1 to 0.2)     | 0.6 (0.5 to 0.7) | 0.2 (0.2 to 0.3)    | -0.6 (-0.7 to -0.5) | 20.8 (16.6 to 23.3)    | 7.7 (6.1 to 9.9)       | -0.6 (-0.7 to -0.5) |
| Oman                     | 0.9 (0.7 to 1.2)    | 0.9 (0.7 to 1.3)    | 0 (-0.2 to 0.2)     | 0.2 (0.1 to 0.3) | 0.1 (0 to 0.1)      | -0.7 (-0.8 to 0)    | 4.7 (2.2 to 8.6)       | 1.8 (0.9 to 3)         | -0.6 (-0.8 to 0.1)  |
| Pakistan                 | 0.7 (0.5 to 1)      | 0.7 (0.5 to 1)      | 0 (-0.1 to 0.1)     | 0.2 (0.1 to 0.4) | 0.2 (0.1 to 0.3)    | -0.2 (-0.4 to 0.2)  | 5.5 (2.5 to 9.2)       | 4.8 (2.8 to 7.1)       | -0.1 (-0.4 to 0.3)  |
| Palau                    | 0.6 (0.4 to 0.8)    | 0.6 (0.4 to 0.8)    | 0 (-0.1 to 0.1)     | 0.1 (0 to 0.1)   | 0 (0 to 0.1)        | -0.3 (-0.5 to 0.2)  | 2.2 (1.4 to 3.4)       | 1.8 (1.2 to 2.5)       | -0.2 (-0.5 to 0.3)  |
| Palestine                | 1.1 (0.9 to 1.5)    | 1.2 (0.9 to 1.6)    | 0.1 (0 to 0.2)      | 0.3 (0.1 to 0.6) | 0.1 (0 to 0.1)      | -0.8 (-0.9 to -0.4) | 6 (2.1 to 11.1)        | 1.7 (1.1 to 2.3)       | -0.7 (-0.9 to -0.3) |
| Panama                   | 0.7 (0.4 to 1)      | 0.8 (0.5 to 1.2)    | 0.2 (0 to 0.5)      | 0.1 (0.1 to 0.1) | 0.1 (0 to 0.1)      | -0.3 (-0.6 to 0.2)  | 3.3 (2.5 to 4.9)       | 2.6 (1.6 to 4.3)       | -0.2 (-0.5 to 0.3)  |
| Papua New Guinea         | 1.4 (1 to 1.9)      | 1.4 (1 to 2)        | 0 (-0.1 to 0.2)     | 0.3 (0.1 to 0.6) | 0.2 (0.1 to 0.4)    | -0.3 (-0.6 to 0)    | 8.2 (3.7 to 16.2)      | 5.5 (2.8 to 9.8)       | -0.3 (-0.6 to 0.1)  |
| Paraguay                 | 1.6 (1 to 2.4)      | 2 (1.3 to 2.9)      | 0.3 (0.1 to 0.5)    | 0.3 (0.2 to 0.4) | 0.2 (0.1 to 0.2)    | -0.4 (-0.6 to 0)    | 8.8 (5.3 to 12.3)      | 5.6 (3.6 to 8.3)       | -0.4 (-0.6 to 0)    |
| Peru                     | 0.8 (0.5 to 1.2)    | 1 (0.7 to 1.4)      | 0.2 (0.1 to 0.5)    | 0.1 (0.1 to 0.1) | 0 (0 to 0.1)        | -0.6 (-0.8 to -0.2) | 2.6 (1.6 to 3.9)       | 1.2 (0.8 to 1.8)       | -0.6 (-0.7 to -0.1) |
| Philippines              | 1.3 (1 to 1.7)      | 1.3 (1 to 1.7)      | 0 (0 to 0.1)        | 0.1 (0.1 to 0.1) | 0.2 (0.1 to 0.2)    | 0.7 (0.1 to 1.4)    | 2.5 (1.8 to 4)         | 5.8 (3.5 to 8.2)       | 1.3 (0.1 to 2.2)    |
| Poland                   | 31.9 (23.2 to 44.2) | 38.7 (29.1 to 52.3) | 0.2 (0.1 to 0.4)    | 2.6 (2 to 3.2)   | 2.8 (1.9 to 3.6)    | 0.1 (-0.2 to 0.4)   | 64 (54.2 to 78.1)      | 85.7 (58.2 to 112.3)   | 0.3 (-0.1 to 0.8)   |
| Portugal                 | 9 (6.6 to 12)       | 6.3 (4.7 to 8.2)    | -0.3 (-0.4 to -0.2) | 0.4 (0.4 to 0.5) | 0.3 (0.2 to 0.4)    | -0.2 (-0.5 to 0)    | 13.4 (11.2 to 16.8)    | 11.1 (7.6 to 14)       | -0.2 (-0.4 to 0)    |
| Puerto Rico              | 7.7 (5.6 to 10.6)   | 6.7 (4.8 to 9.3)    | -0.1 (-0.2 to 0)    | 1.1 (0.8 to 1.6) | 0.3 (0.2 to 0.5)    | -0.7 (-0.8 to -0.5) | 31.4 (22.8 to 45)      | 11.4 (7.8 to 16.7)     | -0.6 (-0.8 to -0.4) |
| Qatar                    | 3.6 (2.8 to 4.5)    | 3.3 (2.5 to 4.3)    | -0.1 (-0.2 to 0.1)  | 0.3 (0.2 to 0.7) | 0.2 (0.1 to 0.3)    | -0.6 (-0.8 to 0.1)  | 7 (4.1 to 12.1)        | 2.9 (1.7 to 4.5)       | -0.6 (-0.8 to -0.1) |
| Republic of Korea        | 1.3 (0.9 to 1.7)    | 1.3 (0.9 to 1.7)    | 0 (-0.1 to 0.1)     | 0.1 (0.1 to 0.1) | 0 (0 to 0)          | -0.7 (-0.8 to -0.4) | 2.8 (1.7 to 4.5)       | 1 (0.7 to 1.2)         | -0.7 (-0.8 to -0.4) |
| Republic of Moldova      | 14.5 (10 to 20.6)   | 27.2 (18.5 to 39)   | 0.9 (0.6 to 1.1)    | 0.3 (0.2 to 1)   | 4.2 (2.8 to 5.2)    | 12.1 (2.4 to 22.2)  | 12.2 (7.8 to 34.7)     | 147.1 (101.1 to 184.3) | 11.1 (2.4 to 19.7)  |
| Romania                  | 13.8 (9.9 to 19.1)  | 12.2 (8.5 to 17.3)  | -0.1 (-0.3 to 0)    | 3.4 (2.4 to 4.3) | 2.1 (1.4 to 3)      | -0.4 (-0.6 to -0.1) | 119.5 (84 to 147.8)    | 67.6 (45.3 to 98.7)    | -0.4 (-0.6 to -0.2) |
| Russian Federation       | 54.9 (39.6 to 74.8) | 51 (36.4 to 70.8)   | -0.1 (-0.1 to 0)    | 10 (7.7 to 15.8) | 15.6 (11.7 to 19.2) | 0.6 (-0.2 to 1.2)   | 359.5 (265.5 to 571.3) | 602.2 (452.3 to 738.5) | 0.7 (-0.1 to 1.5)   |
| Rwanda                   | 2.7 (1.7 to 3.9)    | 2.8 (1.8 to 4.1)    | 0 (-0.1 to 0.2)     | 0.1 (0.1 to 0.3) | 0 (0 to 0.1)        | -0.7 (-0.9 to -0.3) | 4.6 (2.2 to 10.6)      | 1.5 (0.6 to 2.8)       | -0.7 (-0.9 to -0.2) |

|                                  |                     |                     |                     |                  |                  |                     |                        |                     |                     |
|----------------------------------|---------------------|---------------------|---------------------|------------------|------------------|---------------------|------------------------|---------------------|---------------------|
| Saint Kitts and Nevis            | 7.8 (5.7 to 10.6)   | 8.4 (6.2 to 11.4)   | 0.1 (0 to 0.2)      | 1.4 (1 to 2)     | 1.6 (1.1 to 2.1) | 0.2 (-0.3 to 0.8)   | 43.7 (32.4 to 63.3)    | 46.6 (30.9 to 63.3) | 0.1 (-0.4 to 0.7)   |
| Saint Lucia                      | 16.4 (11.8 to 22)   | 17.9 (12.5 to 24)   | 0.1 (-0.1 to 0.2)   | 2.3 (1.7 to 3.3) | 2.6 (1.9 to 3.3) | 0.2 (-0.3 to 0.7)   | 69.1 (51.6 to 97.1)    | 80.8 (58.2 to 102)  | 0.2 (-0.3 to 0.7)   |
| Saint Vincent and the Grenadines | 5.6 (3.9 to 7.6)    | 6.8 (4.7 to 9.4)    | 0.2 (0 to 0.4)      | 0.5 (0.4 to 0.8) | 1.3 (0.9 to 1.6) | 1.3 (0.5 to 2.2)    | 17.2 (13.9 to 24.3)    | 38.6 (27.8 to 48.2) | 1.2 (0.4 to 2.1)    |
| Samoa                            | 1.6 (1.2 to 2.3)    | 1.7 (1.2 to 2.3)    | 0 (-0.1 to 0.1)     | 0.3 (0.2 to 0.4) | 0.2 (0.1 to 0.3) | -0.4 (-0.6 to -0.1) | 7.2 (4.6 to 11.3)      | 4.7 (2.9 to 7.4)    | -0.3 (-0.6 to 0)    |
| San Marino                       | 30.6 (22.6 to 40.8) | 22.3 (16.3 to 29.5) | -0.3 (-0.4 to -0.2) | 1.3 (0.9 to 1.7) | 0.9 (0.5 to 1.4) | -0.3 (-0.6 to 0.2)  | 33.7 (24.4 to 43.8)    | 23.6 (14.4 to 36.8) | -0.3 (-0.6 to 0.2)  |
| Sao Tome and Principe            | 6.2 (3.6 to 9.7)    | 6.9 (4.2 to 10.7)   | 0.1 (0 to 0.3)      | 0.4 (0.2 to 0.6) | 0.2 (0.1 to 0.3) | -0.4 (-0.7 to 0)    | 11.8 (6.2 to 19.3)     | 6.8 (3.8 to 11.2)   | -0.4 (-0.7 to 0)    |
| Saudi Arabia                     | 1.3 (1 to 1.8)      | 1.5 (1.1 to 2)      | 0.1 (0 to 0.3)      | 0.3 (0.1 to 0.6) | 0.1 (0 to 0.2)   | -0.6 (-0.9 to -0.1) | 5.3 (2.8 to 10.7)      | 2.2 (1.3 to 3.3)    | -0.6 (-0.8 to -0.1) |
| Senegal                          | 5.2 (3.2 to 7.9)    | 5 (3.1 to 7.5)      | 0 (-0.2 to 0.1)     | 0.4 (0.2 to 0.6) | 0.1 (0.1 to 0.2) | -0.7 (-0.8 to -0.4) | 11.8 (6.5 to 19.8)     | 4.4 (2.4 to 7.7)    | -0.6 (-0.8 to -0.4) |
| Serbia                           | 8.2 (5.6 to 11.7)   | 5.7 (4.1 to 7.6)    | -0.3 (-0.5 to -0.1) | 0.8 (0.5 to 1.3) | 1.1 (0.6 to 1.8) | 0.5 (-0.1 to 1.6)   | 27.1 (16.5 to 42.3)    | 38 (19.3 to 60.4)   | 0.4 (-0.2 to 1.4)   |
| Seychelles                       | 5.7 (4 to 8)        | 5.5 (3.9 to 7.6)    | 0 (-0.2 to 0.1)     | 1 (0.6 to 1.4)   | 0.6 (0.4 to 0.8) | -0.4 (-0.6 to 0)    | 31.3 (20.5 to 44.3)    | 20.3 (13.7 to 26.7) | -0.3 (-0.6 to 0)    |
| Sierra Leone                     | 7.6 (4.6 to 11.7)   | 8 (4.8 to 12.4)     | 0.1 (-0.1 to 0.2)   | 0.6 (0.3 to 1)   | 0.2 (0.1 to 0.4) | -0.6 (-0.8 to -0.3) | 18.1 (10.2 to 30.5)    | 7.4 (3.9 to 13)     | -0.6 (-0.8 to -0.2) |
| Singapore                        | 5.8 (4.4 to 7.6)    | 4.6 (3.4 to 6)      | -0.2 (-0.3 to -0.1) | 0.7 (0.5 to 0.9) | 0.1 (0.1 to 0.2) | -0.9 (-0.9 to -0.8) | 22.3 (17.4 to 32.1)    | 3.6 (2.3 to 5.5)    | -0.8 (-0.9 to -0.7) |
| Slovakia                         | 12.6 (8.6 to 17.5)  | 19.9 (13.3 to 27.6) | 0.6 (0.2 to 1.1)    | 0.7 (0.6 to 1.1) | 1.6 (0.8 to 2.4) | 1.2 (0.1 to 2.8)    | 27.1 (20.4 to 38.2)    | 55.8 (27.7 to 81.2) | 1.1 (0 to 2.4)      |
| Slovenia                         | 25.2 (17.6 to 33.8) | 16.4 (12.3 to 21.2) | -0.3 (-0.5 to -0.2) | 13 (4.9 to 23.4) | 0.2 (0.1 to 0.3) | -1 (-1 to -1)       | 245.3 (117.5 to 401.9) | 4 (2.8 to 5.6)      | -1 (-1 to -1)       |
| Solomon Islands                  | 1.2 (0.8 to 1.6)    | 1.2 (0.8 to 1.6)    | 0 (-0.1 to 0.1)     | 0.4 (0.2 to 0.8) | 0.3 (0.1 to 0.5) | -0.4 (-0.6 to 0)    | 12.8 (5 to 24.3)       | 7.9 (3.3 to 15.7)   | -0.4 (-0.6 to 0)    |
| Somalia                          | 2.8 (1.7 to 4.1)    | 3 (1.9 to 4.4)      | 0.1 (0 to 0.2)      | 0.1 (0 to 0.2)   | 0.1 (0 to 0.2)   | -0.2 (-0.6 to 0.5)  | 2.7 (1.2 to 6.4)       | 2.1 (0.8 to 5.3)    | -0.2 (-0.6 to 0.4)  |

|                            |                     |                     |                     |                  |                  |                     |                     |                      |                     |
|----------------------------|---------------------|---------------------|---------------------|------------------|------------------|---------------------|---------------------|----------------------|---------------------|
| South Africa               | 0.6 (0.4 to 0.8)    | 0.5 (0.4 to 0.7)    | -0.1 (-0.1 to -0.1) | 0 (0 to 0.1)     | 0 (0 to 0)       | -0.3 (-0.4 to -0.1) | 1.3 (1 to 1.7)      | 0.9 (0.6 to 1.2)     | -0.3 (-0.5 to -0.1) |
| South Sudan                | 1.6 (1 to 2.4)      | 1.6 (1 to 2.4)      | 0 (-0.1 to 0.1)     | 0 (0 to 0.1)     | 0 (0 to 0)       | -0.4 (-0.7 to 0.1)  | 1.4 (0.6 to 2.8)    | 0.9 (0.4 to 1.6)     | -0.4 (-0.7 to 0.1)  |
| Spain                      | 11.6 (8.4 to 15.3)  | 8.1 (5.8 to 10.7)   | -0.3 (-0.4 to -0.2) | 0.9 (0.6 to 1)   | 0.3 (0.2 to 0.4) | -0.7 (-0.7 to -0.5) | 21.2 (16.9 to 25.4) | 9.3 (7 to 13.3)      | -0.6 (-0.7 to -0.4) |
| Sri Lanka                  | 8.9 (6.4 to 12.5)   | 9.3 (6.6 to 12.5)   | 0 (-0.1 to 0.2)     | 0.6 (0.4 to 0.9) | 0.8 (0.4 to 1.3) | 0.4 (-0.3 to 1.3)   | 20.2 (12.6 to 29.6) | 26.8 (13.2 to 44)    | 0.3 (-0.3 to 1.2)   |
| Sudan                      | 2 (1.4 to 2.8)      | 2.2 (1.5 to 3)      | 0.1 (0 to 0.2)      | 0.6 (0.2 to 1.3) | 0.2 (0.1 to 0.4) | -0.7 (-0.8 to -0.2) | 15.5 (5.4 to 31.5)  | 5.6 (3 to 9.2)       | -0.6 (-0.8 to -0.2) |
| Suriname                   | 1.6 (1.1 to 2.2)    | 1.7 (1.2 to 2.3)    | 0.1 (-0.1 to 0.2)   | 0.2 (0.1 to 0.3) | 0.2 (0.1 to 0.3) | 0.1 (-0.3 to 0.7)   | 6.4 (4.6 to 9)      | 7.4 (4.5 to 10.1)    | 0.2 (-0.3 to 0.7)   |
| Sweden                     | 35.4 (25.3 to 48.7) | 34.1 (23.9 to 47.7) | 0 (-0.2 to 0.1)     | 0.8 (0.7 to 1.1) | 0.7 (0.5 to 0.9) | -0.1 (-0.4 to 0.1)  | 29.5 (24.1 to 39)   | 23.7 (18.6 to 29)    | -0.2 (-0.4 to 0)    |
| Switzerland                | 22.4 (15.9 to 29.9) | 14.8 (11.5 to 18.5) | -0.3 (-0.5 to -0.2) | 1.7 (1.2 to 2.1) | 0.5 (0.3 to 0.7) | -0.7 (-0.8 to -0.6) | 47.7 (34.2 to 57.1) | 13.6 (9.6 to 17.9)   | -0.7 (-0.8 to -0.6) |
| Syrian Arab Republic       | 2 (1.4 to 2.8)      | 2.3 (1.6 to 3.1)    | 0.1 (0 to 0.3)      | 0.3 (0.2 to 0.5) | 0.2 (0.1 to 0.3) | -0.5 (-0.8 to -0.1) | 8.1 (4.7 to 12.4)   | 4.3 (2.1 to 7)       | -0.5 (-0.7 to -0.1) |
| Taiwan (Province of China) | 8.1 (6 to 10.5)     | 7.6 (5.8 to 9.6)    | -0.1 (-0.2 to 0.1)  | 0.4 (0.3 to 0.5) | 0.2 (0.1 to 0.3) | -0.6 (-0.7 to -0.4) | 12.5 (10.7 to 15.7) | 7.4 (5.1 to 10.3)    | -0.4 (-0.6 to -0.2) |
| Tajikistan                 | 0.2 (0.1 to 0.2)    | 0.2 (0.1 to 0.2)    | 0 (-0.1 to 0.1)     | 0 (0 to 0.1)     | 0 (0 to 0.1)     | 0.1 (-0.3 to 0.7)   | 1 (0.6 to 1.9)      | 1 (0.7 to 1.8)       | 0 (-0.3 to 0.6)     |
| Thailand                   | 1.1 (0.8 to 1.5)    | 1.2 (0.9 to 1.7)    | 0.1 (0 to 0.2)      | 0.1 (0 to 0.1)   | 0 (0 to 0)       | -0.5 (-0.7 to 0)    | 1.6 (1 to 2.7)      | 1 (0.7 to 1.5)       | -0.4 (-0.6 to 0.1)  |
| Timor-Leste                | 1.2 (0.9 to 1.5)    | 1.4 (1 to 1.8)      | 0.2 (0.1 to 0.3)    | 0.1 (0.1 to 0.3) | 0.1 (0.1 to 0.2) | 0 (-0.5 to 0.8)     | 3.8 (1.9 to 7.6)    | 3.9 (2 to 7.4)       | 0 (-0.5 to 0.9)     |
| Togo                       | 4.8 (2.9 to 7.4)    | 4.8 (2.9 to 7.3)    | 0 (-0.1 to 0.1)     | 0.4 (0.2 to 0.7) | 0.2 (0.1 to 0.3) | -0.6 (-0.8 to -0.3) | 13.7 (7.7 to 22.2)  | 5.8 (3.4 to 9.8)     | -0.6 (-0.8 to -0.3) |
| Tokelau                    | 1.6 (1.2 to 2.2)    | 1.8 (1.3 to 2.4)    | 0.1 (0 to 0.2)      | 0.3 (0.2 to 0.5) | 0.1 (0.1 to 0.2) | -0.6 (-0.7 to -0.3) | 8.1 (4.2 to 13.6)   | 3.6 (2.1 to 5.6)     | -0.6 (-0.7 to -0.2) |
| Tonga                      | 1.7 (1.2 to 2.4)    | 1.7 (1.2 to 2.3)    | 0 (-0.1 to 0.1)     | 0.1 (0.1 to 0.2) | 0.1 (0.1 to 0.1) | -0.3 (-0.5 to 0.1)  | 3.6 (2.1 to 5.7)    | 2.7 (1.5 to 4.3)     | -0.3 (-0.5 to 0.2)  |
| Trinidad and Tobago        | 4.6 (3.3 to 6.5)    | 4.6 (3.2 to 6.5)    | 0 (-0.2 to 0.2)     | 0.6 (0.4 to 1)   | 0.6 (0.4 to 0.9) | 0 (-0.4 to 0.8)     | 17.1 (11.3 to 29.6) | 18.1 (12 to 28.4)    | 0.1 (-0.4 to 0.8)   |
| Tunisia                    | 1.7 (1.2 to 2.3)    | 1.9 (1.4 to 2.6)    | 0.1 (0 to 0.2)      | 0.2 (0.1 to 0.3) | 0.1 (0 to 0.2)   | -0.5 (-0.7 to -0.1) | 4.7 (2.7 to 7.3)    | 2.9 (1.5 to 4.8)     | -0.4 (-0.7 to 0)    |
| Turkey                     | 1.1 (0.8 to 1.5)    | 0.9 (0.7 to 1.1)    | -0.2 (-0.4 to -0.1) | 0.1 (0 to 0.2)   | 0 (0 to 0)       | -0.7 (-0.8 to -0.3) | 2.7 (1.5 to 4.3)    | 1 (0.7 to 1.4)       | -0.6 (-0.8 to -0.3) |
| Turkmenistan               | 3.2 (2.3 to 4.5)    | 3.4 (2.5 to 4.8)    | 0.1 (0 to 0.2)      | 1.2 (0.6 to 2.5) | 1.5 (0.8 to 3.3) | 0.3 (-0.3 to 1.2)   | 40.2 (20.3 to 85.3) | 54.4 (27.9 to 120.5) | 0.4 (-0.2 to 1.2)   |

|                                    |                     |                     |                     |                    |                     |                     |                        |                        |                     |
|------------------------------------|---------------------|---------------------|---------------------|--------------------|---------------------|---------------------|------------------------|------------------------|---------------------|
| Tuvalu                             | 1.4 (1 to 2)        | 1.5 (1.1 to 2.1)    | 0.1 (0 to 0.2)      | 0.4 (0.2 to 0.8)   | 0.2 (0.1 to 0.3)    | -0.5 (-0.7 to -0.2) | 11.5 (5.5 to 19.8)     | 5.5 (3.2 to 8.5)       | -0.5 (-0.7 to -0.2) |
| Uganda                             | 1.9 (1.2 to 2.9)    | 1.9 (1.2 to 2.9)    | 0 (-0.1 to 0.1)     | 0.1 (0 to 0.1)     | 0 (0 to 0.1)        | -0.4 (-0.7 to 0)    | 2.5 (1.2 to 4.7)       | 1.5 (0.7 to 2.8)       | -0.4 (-0.6 to 0)    |
| Ukraine                            | 54.2 (39.8 to 71.8) | 50.8 (37.2 to 67)   | -0.1 (-0.2 to 0)    | 12.2 (9.8 to 14.9) | 16.2 (12.4 to 22.3) | 0.3 (-0.1 to 0.9)   | 432.4 (345.5 to 522.6) | 636.3 (483.5 to 875.8) | 0.5 (0 to 1.1)      |
| United Arab Emirates               | 2.1 (1.5 to 2.9)    | 2.1 (1.5 to 2.8)    | 0 (-0.1 to 0.1)     | 0.4 (0.1 to 1)     | 0.1 (0 to 0.3)      | -0.7 (-0.8 to -0.3) | 10.6 (3.6 to 24.4)     | 4.1 (1.5 to 8.2)       | -0.6 (-0.8 to -0.3) |
| United Kingdom                     | 10.1 (7.5 to 13.3)  | 8 (6.3 to 10.2)     | -0.2 (-0.3 to -0.1) | 0.6 (0.5 to 0.7)   | 0.5 (0.4 to 0.6)    | -0.2 (-0.4 to -0.1) | 21.1 (18.3 to 26.2)    | 17.2 (13.6 to 20.6)    | -0.2 (-0.3 to -0.1) |
| United Republic of Tanzania        | 2.1 (1.3 to 3)      | 2.3 (1.5 to 3.3)    | 0.1 (0 to 0.3)      | 0.1 (0 to 0.1)     | 0 (0 to 0.1)        | -0.3 (-0.6 to 0.4)  | 2.1 (1 to 3.8)         | 1.6 (0.6 to 2.9)       | -0.2 (-0.5 to 0.4)  |
| United States of America           | 43.5 (32.7 to 59.6) | 40.3 (31.3 to 52.5) | -0.1 (-0.2 to 0.1)  | 2.1 (1.5 to 2.6)   | 1.1 (0.9 to 1.4)    | -0.5 (-0.6 to -0.3) | 67.4 (50.4 to 79.4)    | 36 (30.8 to 44)        | -0.5 (-0.6 to -0.3) |
| United States Virgin Islands       | 13.9 (10 to 18.7)   | 13.2 (9.3 to 17.9)  | -0.1 (-0.2 to 0.1)  | 2.8 (2 to 4.2)     | 3 (2 to 4)          | 0.1 (-0.3 to 0.6)   | 86.6 (63.9 to 127.4)   | 90.5 (59.5 to 122)     | 0 (-0.3 to 0.6)     |
| Uruguay                            | 23.9 (16.2 to 33.5) | 19.4 (13.3 to 26.8) | -0.2 (-0.3 to -0.1) | 2.3 (1.7 to 3.2)   | 1 (0.7 to 1.4)      | -0.6 (-0.8 to -0.4) | 62.4 (46.6 to 86.9)    | 28.1 (20.5 to 37.5)    | -0.6 (-0.8 to -0.4) |
| Uzbekistan                         | 0.1 (0.1 to 0.1)    | 0.1 (0.1 to 0.1)    | 0.1 (-0.1 to 0.2)   | 0 (0 to 0.1)       | 0.1 (0 to 0.1)      | 0.3 (-0.3 to 2.5)   | 1.1 (0.5 to 2)         | 1.4 (1.1 to 2.1)       | 0.3 (-0.3 to 1.8)   |
| Vanuatu                            | 1.7 (1.2 to 2.4)    | 1.6 (1.2 to 2.3)    | 0 (-0.2 to 0.1)     | 0.4 (0.2 to 0.6)   | 0.3 (0.1 to 0.4)    | -0.3 (-0.6 to 0.1)  | 10.3 (4.8 to 17.1)     | 7.2 (3.7 to 11.9)      | -0.3 (-0.5 to 0.1)  |
| Venezuela (Bolivarian Republic of) | 1.6 (0.9 to 2.7)    | 1.7 (1 to 2.8)      | 0 (-0.2 to 0.3)     | 1 (0.6 to 1.5)     | 0.3 (0.2 to 0.4)    | -0.7 (-0.8 to -0.6) | 26.9 (17.2 to 37.6)    | 8.7 (5.8 to 12.4)      | -0.7 (-0.8 to -0.5) |
| Viet Nam                           | 1.7 (1.3 to 2.2)    | 2.1 (1.6 to 2.7)    | 0.3 (0.1 to 0.5)    | 0.1 (0.1 to 0.3)   | 0.2 (0.1 to 0.3)    | 0.1 (-0.4 to 1)     | 4.2 (2.2 to 8)         | 5.1 (2.9 to 9.5)       | 0.2 (-0.3 to 1.1)   |
| Yemen                              | 1.5 (1.1 to 2.1)    | 1.6 (1.1 to 2.2)    | 0.1 (-0.1 to 0.2)   | 0.6 (0.2 to 1.3)   | 0.2 (0.1 to 0.4)    | -0.6 (-0.8 to -0.1) | 13.5 (4.3 to 29.1)     | 5.6 (3.1 to 9)         | -0.6 (-0.8 to -0.1) |
| Zambia                             | 1.6 (1 to 2.3)      | 1.7 (1.1 to 2.5)    | 0.1 (0 to 0.2)      | 0 (0 to 0.1)       | 0 (0 to 0.1)        | 0.1 (-0.4 to 1)     | 1.3 (0.8 to 2.8)       | 1.4 (0.8 to 2.6)       | 0.1 (-0.4 to 1)     |
| Zimbabwe                           | 0.3 (0.2 to 0.4)    | 0.3 (0.2 to 0.4)    | 0 (-0.2 to 0.2)     | 0 (0 to 0)         | 0 (0 to 0.1)        | 0.1 (-0.3 to 0.7)   | 1 (0.7 to 1.4)         | 1.2 (0.8 to 1.8)       | 0.2 (-0.2 to 0.8)   |

**Table S3.** Age-standardized prevalence, death, DALYs rates of other cardiomyopathy, and their percentage changes with 95% UIs from 1990 to 2019 at national level, both sexes.

| Countries           | Prevalence             |                        |                     | Deaths             |                     |                      | DALYs                  |                        |                      |
|---------------------|------------------------|------------------------|---------------------|--------------------|---------------------|----------------------|------------------------|------------------------|----------------------|
|                     | 1990 age-              | 2019                   | Percentage change   | 1990 age-          | 2019                | Percentage change    | 1990 age-              | 2019                   | Percentage change    |
|                     | standardized           | age-standardized       | in age-standardized | standardized       | age-standardized    | in age-standardized  | standardized           | age-standardized       | in age-standardized  |
|                     | rate per 100,000       | rate per 100,000       | rates, 1990–2019    | rate per 100,000   | rate per 100,000    | rates, 1990–2019 (%) | rate per 100,000       | rate per 100,000       | rates, 1990–2019 (%) |
|                     | people                 | people                 | (%)                 | people             | people              |                      | people                 | people                 |                      |
| Afghanistan         | 7.5 (5.7 to 9.6)       | 7.9 (6 to 9.9)         | 0.1 (-0.1 to 0.2)   | 2.4 (1.2 to 4.7)   | 2.1 (1.1 to 3.8)    | -0.1 (-0.3 to 0.3)   | 60 (27.9 to 141.7)     | 49.7 (25.8 to 98.8)    | -0.2 (-0.4 to 0.2)   |
| Albania             | 65.1 (47 to 89)        | 54.6 (39.6 to 75.9)    | -0.2 (-0.3 to 0)    | 10.7 (6.8 to 12.8) | 5.8 (4 to 9.3)      | -0.5 (-0.6 to 0)     | 179 (127.3 to 208.1)   | 110 (76.6 to 179.1)    | -0.4 (-0.6 to 0)     |
| Algeria             | 19.5 (14.4 to 26)      | 20.2 (15 to 26.6)      | 0 (-0.1 to 0.1)     | 3 (2.1 to 4.8)     | 2.1 (1.5 to 3.2)    | -0.3 (-0.5 to 0)     | 79.5 (54.1 to 144.1)   | 50.6 (36.1 to 78)      | -0.4 (-0.6 to 0)     |
| American Samoa      | 85.6 (63.7 to 113.1)   | 86.3 (63.7 to 113.7)   | 0 (-0.1 to 0.1)     | 7.6 (6.1 to 10.6)  | 7 (5.4 to 9.3)      | -0.1 (-0.3 to 0.2)   | 217.2 (175.9 to 297.5) | 207.7 (158.1 to 276.7) | 0 (-0.3 to 0.3)      |
| Andorra             | 80.4 (60.9 to 103.2)   | 58.5 (44.4 to 75.6)    | -0.3 (-0.3 to -0.2) | 4.8 (2.8 to 6.9)   | 4.5 (2.9 to 5.9)    | -0.1 (-0.4 to 0.4)   | 78.9 (53.8 to 110.1)   | 71 (51.3 to 92.5)      | -0.1 (-0.4 to 0.3)   |
| Angola              | 199.1 (129.1 to 286.2) | 219.3 (142.6 to 309.5) | 0.1 (0 to 0.2)      | 9.6 (4.9 to 14.6)  | 8.5 (5 to 12.2)     | -0.1 (-0.4 to 0.3)   | 274.5 (139.4 to 396.9) | 233.3 (146.1 to 319.4) | -0.2 (-0.4 to 0.3)   |
| Antigua and Barbuda | 29.5 (23.1 to 37.4)    | 30.9 (23.2 to 40.5)    | 0 (-0.1 to 0.2)     | 3.9 (3.4 to 4.9)   | 4.6 (3.3 to 5.6)    | 0.2 (-0.3 to 0.5)    | 101.2 (89.4 to 126)    | 107 (77.3 to 129.6)    | 0.1 (-0.3 to 0.3)    |
| Argentina           | 61.3 (41.5 to 85.5)    | 78.8 (55.7 to 108.8)   | 0.3 (0.1 to 0.6)    | 13.8 (9.6 to 16.3) | 10.8 (8.6 to 12.1)  | -0.2 (-0.3 to 0)     | 292.9 (232.1 to 335.1) | 212.2 (186.4 to 237.8) | -0.3 (-0.4 to -0.1)  |
| Armenia             | 15 (11.4 to 19.3)      | 7.5 (5.6 to 9.7)       | -0.5 (-0.6 to -0.4) | 1.5 (0.6 to 2.9)   | 2.5 (1.3 to 3.4)    | 0.7 (-0.3 to 2.3)    | 29.6 (20.2 to 49)      | 47.5 (30.9 to 61.6)    | 0.6 (-0.3 to 1.7)    |
| Australia           | 111.9 (85.6 to 146.7)  | 76.3 (58 to 98.7)      | -0.3 (-0.4 to -0.2) | 5.4 (3.3 to 6.1)   | 2.2 (1.8 to 2.8)    | -0.6 (-0.7 to -0.3)  | 118.9 (86.8 to 131.4)  | 49.9 (43 to 67.3)      | -0.6 (-0.7 to -0.3)  |
| Austria             | 173 (129.9 to 220.6)   | 117.9 (89.6 to 149.3)  | -0.3 (-0.4 to -0.2) | 35.6 (7.6 to 42.7) | 7.1 (4.9 to 8.3)    | -0.8 (-0.8 to -0.3)  | 448.1 (150.4 to 521.2) | 92.8 (80.3 to 116.3)   | -0.8 (-0.8 to -0.4)  |
| Azerbaijan          | 55.2 (41.7 to 71.4)    | 51.1 (38.3 to 66)      | -0.1 (-0.2 to 0)    | 14.1 (11 to 19.5)  | 15.6 (11.9 to 22.1) | 0.1 (-0.1 to 0.4)    | 399.3 (298.2 to 596.8) | 393.7 (286.1 to 638.1) | 0 (-0.2 to 0.2)      |

|                                  |                        |                        |                     |                     |                    |                     |                        |                        |                     |
|----------------------------------|------------------------|------------------------|---------------------|---------------------|--------------------|---------------------|------------------------|------------------------|---------------------|
| Bahamas                          | 34.2 (26.1 to 44.6)    | 33.5 (25.6 to 43.5)    | 0 (-0.1 to 0.1)     | 7.4 (6.3 to 8.7)    | 7.4 (5.9 to 9)     | 0 (-0.2 to 0.3)     | 209 (179.7 to 247.4)   | 203.1 (158.9 to 255)   | 0 (-0.3 to 0.2)     |
| Bahrain                          | 74.8 (56.2 to 98.1)    | 77.1 (58.4 to 101.8)   | 0 (-0.1 to 0.2)     | 5.2 (4.1 to 7.4)    | 4.1 (3 to 5.5)     | -0.2 (-0.5 to 0.1)  | 138.5 (112.6 to 190.3) | 92.9 (69.3 to 125.5)   | -0.3 (-0.5 to -0.1) |
| Bangladesh                       | 1.3 (0.9 to 1.8)       | 1.4 (1 to 1.9)         | 0.1 (-0.1 to 0.2)   | 0.3 (0.2 to 0.5)    | 0.3 (0.2 to 0.5)   | 0.2 (-0.3 to 1)     | 6.4 (3.6 to 11.1)      | 7.3 (4.1 to 11.4)      | 0.1 (-0.4 to 1)     |
| Barbados                         | 52 (40.1 to 66.6)      | 54.8 (41.7 to 71.3)    | 0.1 (0 to 0.2)      | 5 (4.3 to 5.9)      | 5.1 (4.1 to 6.2)   | 0 (-0.2 to 0.3)     | 129.8 (114.1 to 150.9) | 119.8 (95.8 to 148)    | -0.1 (-0.3 to 0.2)  |
| Belarus                          | 11.7 (9 to 15.1)       | 14.8 (11.5 to 19)      | 0.3 (0.1 to 0.4)    | 3.4 (2 to 4.6)      | 1.9 (1.1 to 3.4)   | -0.4 (-0.7 to 0)    | 119.5 (62 to 164)      | 71.2 (38.8 to 116.3)   | -0.4 (-0.6 to 0)    |
| Belgium                          | 82.9 (61.5 to 107.1)   | 69.6 (55.7 to 84.9)    | -0.2 (-0.3 to 0)    | 6.6 (3.7 to 7.7)    | 3.5 (2.7 to 4.1)   | -0.5 (-0.6 to -0.2) | 107.2 (72.7 to 120.4)  | 51.9 (45.3 to 63.9)    | -0.5 (-0.6 to -0.3) |
| Belize                           | 45.1 (34.5 to 60)      | 49 (37 to 63.7)        | 0.1 (0 to 0.2)      | 5.1 (3.7 to 6.6)    | 5.6 (4.4 to 6.5)   | 0.1 (-0.2 to 0.6)   | 146 (111.2 to 180.9)   | 149.9 (118.8 to 175.5) | 0 (-0.2 to 0.4)     |
| Benin                            | 206.8 (134.1 to 295.5) | 214.2 (140 to 305)     | 0 (-0.1 to 0.2)     | 8.1 (4.3 to 11.7)   | 5.4 (3.8 to 7.1)   | -0.3 (-0.5 to 0)    | 213.4 (120.7 to 295.9) | 149.7 (109 to 201.4)   | -0.3 (-0.5 to 0.1)  |
| Bermuda                          | 62 (47.6 to 80.2)      | 58.5 (44.9 to 76.4)    | -0.1 (-0.1 to 0)    | 5.8 (4.6 to 7.8)    | 4.8 (3.4 to 5.9)   | -0.2 (-0.5 to 0.2)  | 137.9 (110.1 to 186.5) | 105.7 (78.5 to 130.7)  | -0.2 (-0.5 to 0.1)  |
| Bhutan                           | 1 (0.7 to 1.3)         | 1.1 (0.8 to 1.6)       | 0.1 (0 to 0.3)      | 0.2 (0.1 to 0.5)    | 0.3 (0.2 to 0.5)   | 0.4 (-0.1 to 1.6)   | 5.2 (2.3 to 9.9)       | 6.8 (4.2 to 11.4)      | 0.3 (-0.2 to 1.5)   |
| Bolivia (Plurinational State of) | 5.4 (3.2 to 8.8)       | 10 (6.7 to 14.5)       | 0.9 (0.5 to 1.5)    | 2.5 (1.6 to 3.6)    | 2.3 (1.5 to 3.1)   | -0.1 (-0.3 to 0.4)  | 77.4 (43.7 to 120.3)   | 60.3 (39.5 to 81)      | -0.2 (-0.5 to 0.2)  |
| Bosnia and Herzegovina           | 113.4 (82 to 155.6)    | 88.4 (62.8 to 120.8)   | -0.2 (-0.3 to -0.1) | 11.6 (6.6 to 17.1)  | 13.7 (7.2 to 19.3) | 0.2 (-0.2 to 0.7)   | 198.7 (133.6 to 274.9) | 222.3 (122.1 to 316.6) | 0.1 (-0.2 to 0.5)   |
| Botswana                         | 236.4 (151.6 to 335.7) | 239.4 (155.7 to 338.9) | 0 (-0.1 to 0.1)     | 15.7 (12.1 to 21.2) | 11.8 (8.4 to 17.5) | -0.2 (-0.5 to 0)    | 348.2 (270.2 to 471.9) | 273.8 (197 to 400.8)   | -0.2 (-0.4 to 0.1)  |
| Brazil                           | 79.8 (57.2 to 108.9)   | 76.8 (55.3 to 103.5)   | 0 (-0.1 to 0)       | 14.1 (10.8 to 15.2) | 8.6 (7.6 to 10.1)  | -0.4 (-0.4 to -0.2) | 330.8 (260.4 to 355.1) | 209.5 (187.7 to 235.9) | -0.4 (-0.4 to -0.2) |
| Brunei Darussalam                | 58.7 (43.7 to 77.4)    | 47.3 (34.4 to 63.4)    | -0.2 (-0.3 to -0.1) | 7.6 (5.8 to 11.5)   | 8.2 (6.4 to 9.8)   | 0.1 (-0.3 to 0.5)   | 202.4 (159.7 to 307)   | 196.5 (160.3 to 238.2) | 0 (-0.3 to 0.3)     |



|                          |                        |                        |                     |                    |                   |                     |                        |                        |                     |
|--------------------------|------------------------|------------------------|---------------------|--------------------|-------------------|---------------------|------------------------|------------------------|---------------------|
| Bulgaria                 | 17.9 (12.7 to 24.7)    | 15.2 (10.7 to 21.1)    | -0.1 (-0.3 to 0)    | 2.1 (1 to 7.3)     | 5.1 (3.9 to 6.7)  | 1.4 (-0.2 to 3.9)   | 50.7 (31.7 to 136.1)   | 111.4 (85.1 to 141.6)  | 1.2 (-0.2 to 2.9)   |
| Burkina Faso             | 199.5 (131.8 to 282.1) | 196.6 (126.9 to 278.8) | 0 (-0.1 to 0.1)     | 8.7 (4.5 to 13.9)  | 7.2 (5.1 to 9.8)  | -0.2 (-0.4 to 0.3)  | 218.9 (115.4 to 337.5) | 185.2 (133.7 to 249.5) | -0.2 (-0.4 to 0.3)  |
| Burundi                  | 263 (175 to 367.4)     | 269.5 (174.7 to 384.1) | 0 (-0.1 to 0.1)     | 5.2 (3.3 to 7.7)   | 3.7 (2.5 to 5)    | -0.3 (-0.5 to 0.1)  | 196 (119.8 to 286.2)   | 138.6 (98.4 to 188.4)  | -0.3 (-0.5 to 0.1)  |
| Cabo Verde               | 244 (156.5 to 345.8)   | 263.1 (173.7 to 371.1) | 0.1 (0 to 0.2)      | 2.2 (1.7 to 2.8)   | 3 (2.3 to 3.9)    | 0.3 (0 to 0.8)      | 79.1 (61.6 to 100)     | 89.5 (71.4 to 113.4)   | 0.1 (-0.1 to 0.4)   |
| Cambodia                 | 25 (18.3 to 33.5)      | 26.7 (19.5 to 35.2)    | 0.1 (-0.1 to 0.2)   | 3.1 (2 to 4.6)     | 3.2 (2.5 to 4.4)  | 0.1 (-0.2 to 0.5)   | 75.5 (47.9 to 138.2)   | 70.4 (53.3 to 103.7)   | -0.1 (-0.4 to 0.4)  |
| Cameroon                 | 170.4 (119.4 to 236.7) | 201.2 (127.3 to 291.8) | 0.2 (-0.1 to 0.4)   | 8.1 (4.2 to 11.3)  | 5.7 (3.9 to 7.8)  | -0.3 (-0.5 to 0.2)  | 198.5 (106.3 to 273.9) | 153.4 (108.1 to 212.8) | -0.2 (-0.5 to 0.3)  |
| Canada                   | 203.9 (155.4 to 263.5) | 102.4 (83.5 to 125.3)  | -0.5 (-0.6 to -0.4) | 2.6 (2.3 to 3.1)   | 1.7 (1.4 to 2.4)  | -0.4 (-0.5 to -0.1) | 83.6 (71.3 to 94.4)    | 47.3 (40.9 to 62.1)    | -0.4 (-0.5 to -0.3) |
| Central African Republic | 189.9 (122.8 to 273)   | 174.4 (113.6 to 248.4) | -0.1 (-0.2 to 0)    | 11.5 (5.6 to 19.1) | 9.8 (5 to 15.8)   | -0.1 (-0.4 to 0.2)  | 316.2 (152.7 to 495.1) | 268.9 (137.1 to 404)   | -0.1 (-0.4 to 0.2)  |
| Chad                     | 189.8 (123.4 to 272.1) | 201.1 (127.7 to 286.1) | 0.1 (0 to 0.2)      | 7.8 (4 to 12.5)    | 5.8 (4.1 to 7.8)  | -0.2 (-0.5 to 0.2)  | 198.5 (106.9 to 296.4) | 157 (112.7 to 213.4)   | -0.2 (-0.5 to 0.3)  |
| Chile                    | 87.4 (61.7 to 121.7)   | 70.8 (51 to 95.2)      | -0.2 (-0.3 to -0.1) | 4.2 (3.6 to 6)     | 3.4 (2.9 to 4.5)  | -0.2 (-0.3 to 0)    | 105.6 (93.9 to 138.5)  | 85.1 (75.9 to 102.4)   | -0.2 (-0.3 to 0)    |
| China                    | 9.1 (6.9 to 11.7)      | 9.7 (7.3 to 12.4)      | 0.1 (0 to 0.1)      | 0.8 (0.5 to 1.5)   | 0.7 (0.5 to 0.9)  | -0.1 (-0.6 to 0.7)  | 27 (17.2 to 52.5)      | 19.4 (14.8 to 24.4)    | -0.3 (-0.6 to 0.2)  |
| Colombia                 | 28.1 (20.9 to 37.9)    | 24.9 (18.7 to 33.3)    | -0.1 (-0.2 to 0)    | 2.6 (2.3 to 2.9)   | 1.9 (1.4 to 2.5)  | -0.3 (-0.4 to 0)    | 69.7 (62.6 to 79.7)    | 48.5 (36.5 to 66.1)    | -0.3 (-0.5 to 0)    |
| Comoros                  | 277.2 (184.8 to 393.3) | 286.7 (191.1 to 400.7) | 0 (-0.1 to 0.2)     | 4.4 (2.5 to 6.2)   | 3.4 (2.1 to 4.6)  | -0.2 (-0.5 to 0.4)  | 169.2 (95.2 to 243.9)  | 126.8 (81.9 to 170.3)  | -0.3 (-0.5 to 0.4)  |
| Congo                    | 234.7 (153.6 to 333.5) | 235.5 (151.9 to 333.5) | 0 (-0.1 to 0.1)     | 10.9 (5.8 to 15.4) | 8.3 (4.8 to 11.8) | -0.2 (-0.5 to 0.1)  | 295.2 (154.7 to 401.7) | 221.6 (135.8 to 309.7) | -0.2 (-0.5 to 0.1)  |
| Cook Islands             | 8.8 (6.5 to 11.6)      | 8.7 (6.5 to 11.6)      | 0 (-0.1 to 0.1)     | 1.2 (0.9 to 1.6)   | 0.7 (0.6 to 1)    | -0.4 (-0.5 to -0.2) | 36.1 (25.8 to 49.8)    | 20.4 (14.8 to 26.7)    | -0.4 (-0.6 to -0.2) |

|                                       |                        |                        |                     |                     |                   |                     |                        |                        |                     |
|---------------------------------------|------------------------|------------------------|---------------------|---------------------|-------------------|---------------------|------------------------|------------------------|---------------------|
| Costa Rica                            | 48.1 (35.8 to 63.6)    | 46.9 (35.6 to 61.3)    | 0 (-0.1 to 0.1)     | 4.9 (4.2 to 5.7)    | 3.7 (2.7 to 5.3)  | -0.3 (-0.4 to 0)    | 124.3 (110.4 to 140.1) | 92.8 (70.1 to 124.1)   | -0.3 (-0.4 to 0)    |
| Croatia                               | 31 (22 to 42.4)        | 19.6 (14.4 to 26.2)    | -0.4 (-0.5 to -0.2) | 5.6 (4.4 to 8.1)    | 4.2 (3 to 5.9)    | -0.3 (-0.4 to 0)    | 89.9 (74 to 139.7)     | 53.8 (39.2 to 83.3)    | -0.4 (-0.5 to -0.2) |
| Cuba                                  | 22.6 (17.3 to 29.6)    | 26.7 (20.4 to 35.3)    | 0.2 (0.1 to 0.3)    | 1.8 (1.4 to 3.2)    | 2.3 (1.7 to 2.8)  | 0.2 (-0.3 to 0.7)   | 56.3 (45.5 to 85.1)    | 54.4 (43.3 to 67.7)    | 0 (-0.4 to 0.3)     |
| Cyprus                                | 57.8 (43.9 to 75)      | 48.2 (38 to 60.3)      | -0.2 (-0.3 to 0)    | 6.4 (3.9 to 9.7)    | 4.1 (3.2 to 5.8)  | -0.4 (-0.5 to 0)    | 126.9 (83.7 to 161.4)  | 76.2 (59.3 to 93.2)    | -0.4 (-0.5 to -0.2) |
| Czechia                               | 42.4 (31.4 to 56.7)    | 46.7 (33.9 to 64.9)    | 0.1 (-0.1 to 0.4)   | 3.7 (3.2 to 6.5)    | 2.7 (2.1 to 3.8)  | -0.3 (-0.5 to -0.1) | 110.5 (92.1 to 133.3)  | 68.1 (50.9 to 84.9)    | -0.4 (-0.6 to -0.2) |
| Côte d'Ivoire                         | 231 (151.7 to 328.5)   | 232.2 (149.4 to 331.6) | 0 (-0.1 to 0.1)     | 7.7 (4 to 10.7)     | 5 (3.5 to 6.7)    | -0.3 (-0.5 to 0)    | 195.7 (105 to 265.3)   | 137.4 (97.4 to 179.5)  | -0.3 (-0.5 to 0.1)  |
| Democratic People's Republic of Korea | 11.6 (8.8 to 15.3)     | 11.2 (8.4 to 14.6)     | 0 (-0.1 to 0.1)     | 1.5 (1 to 2.4)      | 1.4 (0.9 to 1.9)  | -0.1 (-0.4 to 0.3)  | 47.9 (30.4 to 81.6)    | 37 (25.8 to 51.9)      | -0.2 (-0.5 to 0.1)  |
| Democratic Republic of the Congo      | 213.1 (138 to 308)     | 202.9 (129 to 291)     | 0 (-0.1 to 0.1)     | 9.5 (5.2 to 14.7)   | 8.5 (4.9 to 14.9) | -0.1 (-0.4 to 0.3)  | 262.2 (145.9 to 383.3) | 228.6 (138.3 to 375.1) | -0.1 (-0.4 to 0.3)  |
| Denmark                               | 24.6 (19.4 to 30.8)    | 17.2 (13.6 to 21.5)    | -0.3 (-0.4 to -0.2) | 1.6 (1.3 to 3.4)    | 1.5 (1.1 to 2.7)  | -0.1 (-0.2 to 0.1)  | 43.8 (37.7 to 63.3)    | 32.8 (28.2 to 44.6)    | -0.3 (-0.4 to -0.1) |
| Djibouti                              | 273.7 (177.8 to 387.1) | 305.3 (200.4 to 429.4) | 0.1 (0 to 0.2)      | 4.7 (2.8 to 6.6)    | 4 (2.2 to 6)      | -0.1 (-0.4 to 0.3)  | 176.2 (109 to 252)     | 150.6 (90.5 to 232.7)  | -0.1 (-0.4 to 0.2)  |
| Dominica                              | 80.8 (62 to 104.8)     | 82.5 (62.4 to 107.1)   | 0 (-0.1 to 0.1)     | 18.9 (15.3 to 25.9) | 21 (15.6 to 26.6) | 0.1 (-0.2 to 0.5)   | 472.6 (383 to 640.8)   | 514.1 (377 to 662.2)   | 0.1 (-0.2 to 0.5)   |
| Dominican Republic                    | 14.4 (11.1 to 18.8)    | 16.4 (12.5 to 21.7)    | 0.1 (0 to 0.3)      | 1.7 (1.4 to 2.4)    | 2.2 (1.4 to 2.9)  | 0.3 (-0.2 to 0.8)   | 54.9 (44.3 to 75.3)    | 58.9 (37.6 to 79.5)    | 0.1 (-0.3 to 0.6)   |
| Ecuador                               | 12.6 (8.8 to 17.4)     | 14.9 (11 to 19.9)      | 0.2 (0.1 to 0.4)    | 1.5 (1.2 to 2.2)    | 1.7 (1.3 to 2.2)  | 0.1 (-0.2 to 0.6)   | 41 (32.5 to 61.7)      | 44.3 (33.4 to 57.5)    | 0.1 (-0.3 to 0.5)   |
| Egypt                                 | 22.1 (15.2 to 32.1)    | 26.3 (17.8 to 37.6)    | 0.2 (0 to 0.4)      | 3.6 (2.2 to 5.9)    | 2.5 (1.7 to 3.9)  | -0.3 (-0.5 to 0.1)  | 159.1 (85.4 to 303.6)  | 88.6 (58 to 139.4)     | -0.4 (-0.7 to 0.1)  |
| El Salvador                           | 6.9 (4.9 to 9.5)       | 8.1 (5.8 to 10.9)      | 0.2 (0 to 0.3)      | 0.8 (0.6 to 1)      | 0.7 (0.5 to 0.9)  | -0.2 (-0.4 to 0.2)  | 25.3 (18.1 to 31.4)    | 18.6 (12.8 to 25.2)    | -0.3 (-0.5 to 0.1)  |
| Equatorial Guinea                     | 197.4 (126.1 to 279)   | 229.1 (150 to 325.2)   | 0.2 (0 to 0.3)      | 10.2 (4.8 to 16.9)  | 7 (3.3 to 11.2)   | -0.3 (-0.6 to 0.3)  | 283.8 (130.4 to 446)   | 182.4 (92.6 to 292.3)  | -0.4 (-0.7 to 0.3)  |

|           |                        |                        |                     |                    |                    |                     |                        |                        |                     |
|-----------|------------------------|------------------------|---------------------|--------------------|--------------------|---------------------|------------------------|------------------------|---------------------|
| Eritrea   | 200.1 (130.7 to 287.4) | 222.3 (146 to 320.9)   | 0.1 (0 to 0.2)      | 4.4 (2.6 to 6.4)   | 3.8 (2.2 to 5.4)   | -0.1 (-0.4 to 0.3)  | 162.3 (94.7 to 237.4)  | 137.1 (86.6 to 193.5)  | -0.2 (-0.4 to 0.2)  |
| Estonia   | 39.9 (29.4 to 53.9)    | 45.7 (33.8 to 61.5)    | 0.1 (0 to 0.3)      | 8.4 (4.7 to 10.5)  | 4.9 (3.3 to 6.4)   | -0.4 (-0.6 to -0.1) | 300.2 (168.7 to 376.2) | 156.4 (108.1 to 202.9) | -0.5 (-0.6 to -0.2) |
| Eswatini  | 222.7 (142.8 to 319.1) | 214.2 (135.8 to 309)   | 0 (-0.1 to 0.1)     | 14.8 (11.2 to 20)  | 11.9 (8.2 to 18.2) | -0.2 (-0.4 to 0.1)  | 331.4 (253.3 to 436)   | 270.2 (190 to 399.9)   | -0.2 (-0.4 to 0.2)  |
| Ethiopia  | 261.7 (191.7 to 338.2) | 304.5 (225.2 to 391.3) | 0.2 (0.1 to 0.2)    | 4.3 (2.5 to 6.6)   | 3.1 (2.1 to 4)     | -0.3 (-0.6 to 0.3)  | 166.9 (100.6 to 251.4) | 115.9 (83.8 to 146.5)  | -0.3 (-0.6 to 0.2)  |
| Fiji      | 23.7 (17.5 to 31.3)    | 23.5 (17.6 to 31.3)    | 0 (-0.1 to 0.1)     | 3.4 (2.7 to 4.6)   | 3.3 (2.4 to 4.3)   | 0 (-0.3 to 0.4)     | 100.3 (78.7 to 134.7)  | 104.6 (74.8 to 137.4)  | 0 (-0.3 to 0.5)     |
| Finland   | 42.5 (34 to 53.2)      | 41.2 (32.6 to 51.6)    | 0 (-0.2 to 0.1)     | 2.5 (1.6 to 6.5)   | 2.9 (2.4 to 4.6)   | 0.2 (-0.3 to 0.7)   | 63.1 (46.3 to 112.6)   | 64.4 (54.6 to 73.7)    | 0 (-0.4 to 0.4)     |
| France    | 144.9 (113 to 182.8)   | 77 (60 to 96.8)        | -0.5 (-0.5 to -0.4) | 6.2 (4.5 to 7)     | 3.4 (2.7 to 4.1)   | -0.5 (-0.5 to -0.3) | 115.1 (94.5 to 125.8)  | 58.5 (50.5 to 76.8)    | -0.5 (-0.6 to -0.3) |
| Gabon     | 234.4 (151.5 to 332)   | 233.6 (153.5 to 334.8) | 0 (-0.1 to 0.1)     | 9.9 (4.9 to 14.5)  | 7.8 (4.2 to 11)    | -0.2 (-0.5 to 0.1)  | 272 (139.6 to 386.3)   | 211.2 (117.7 to 295.3) | -0.2 (-0.5 to 0.1)  |
| Gambia    | 244 (158.5 to 347.9)   | 256.2 (167.8 to 357.8) | 0.1 (0 to 0.2)      | 7.1 (3.9 to 10.8)  | 5.5 (4 to 7.5)     | -0.2 (-0.5 to 0.3)  | 183.2 (105.5 to 266.2) | 149.9 (111.1 to 198.9) | -0.2 (-0.5 to 0.3)  |
| Georgia   | 16.5 (12.4 to 21.6)    | 15.2 (10.6 to 20.8)    | -0.1 (-0.2 to 0)    | 3.2 (2.4 to 3.9)   | 3.7 (2.4 to 5.2)   | 0.2 (-0.1 to 0.5)   | 82.6 (65 to 103.5)     | 103.7 (71.8 to 146.8)  | 0.3 (-0.2 to 0.7)   |
| Germany   | 55.6 (43.3 to 70.5)    | 44.8 (35.4 to 56.6)    | -0.2 (-0.3 to -0.1) | 5.4 (4.2 to 6.6)   | 3.4 (2.9 to 4.1)   | -0.4 (-0.5 to -0.2) | 94.8 (76.7 to 115.4)   | 55.3 (49.2 to 66.1)    | -0.4 (-0.5 to -0.2) |
| Ghana     | 174.6 (121.4 to 247)   | 195.9 (125.2 to 285.2) | 0.1 (-0.1 to 0.4)   | 7.9 (6.1 to 11.2)  | 9.5 (6.2 to 12.3)  | 0.2 (-0.2 to 0.8)   | 190.5 (146.3 to 261.3) | 227.4 (156.6 to 298.3) | 0.2 (-0.2 to 0.7)   |
| Greece    | 56.6 (43.7 to 71.9)    | 42.7 (32.5 to 54.7)    | -0.2 (-0.3 to -0.2) | 6 (3.3 to 6.8)     | 3.4 (2.6 to 3.9)   | -0.4 (-0.5 to -0.2) | 96.4 (63.9 to 106.9)   | 69.6 (47.9 to 78.9)    | -0.3 (-0.4 to -0.2) |
| Greenland | 250.2 (195 to 315.8)   | 189.1 (147.4 to 242)   | -0.2 (-0.3 to -0.2) | 12.2 (9.1 to 14.9) | 9.8 (7 to 12.5)    | -0.2 (-0.4 to 0.1)  | 370 (285.4 to 448.4)   | 248.8 (180 to 324.8)   | -0.3 (-0.5 to -0.1) |
| Grenada   | 46.6 (35.1 to 61)      | 47.3 (35.9 to 61.2)    | 0 (-0.1 to 0.1)     | 8.8 (7.7 to 10.2)  | 8.6 (6.7 to 9.9)   | 0 (-0.3 to 0.2)     | 229.3 (199.9 to 265.2) | 203.9 (159.6 to 236)   | -0.1 (-0.3 to 0.1)  |

|                            |                        |                        |                     |                    |                  |                     |                        |                        |                     |
|----------------------------|------------------------|------------------------|---------------------|--------------------|------------------|---------------------|------------------------|------------------------|---------------------|
| Guam                       | 34.2 (25.4 to 45.4)    | 35.8 (26.7 to 47.7)    | 0 (-0.1 to 0.2)     | 3.8 (3 to 5.1)     | 2.4 (1.8 to 3.6) | -0.4 (-0.5 to -0.1) | 104.8 (84.4 to 135)    | 81.9 (62.5 to 119.3)   | -0.2 (-0.4 to 0.1)  |
| Guatemala                  | 8.4 (5.5 to 11.8)      | 10.8 (7.8 to 14.9)     | 0.3 (0.1 to 0.5)    | 1.1 (0.8 to 1.4)   | 1.2 (0.8 to 1.5) | 0.1 (-0.4 to 0.6)   | 29.9 (21.8 to 42.8)    | 30.3 (21.1 to 39.3)    | 0 (-0.5 to 0.6)     |
| Guinea                     | 203.5 (146.6 to 274.1) | 224.9 (150.5 to 313.6) | 0.1 (-0.1 to 0.3)   | 8.2 (4.2 to 11.9)  | 6 (4.2 to 8)     | -0.3 (-0.5 to 0.2)  | 214.5 (114.2 to 300.8) | 167.4 (119 to 225)     | -0.2 (-0.5 to 0.2)  |
| Guinea-Bissau              | 198.1 (130.1 to 284.9) | 212.9 (139 to 304.8)   | 0.1 (0 to 0.2)      | 8.7 (3.9 to 14.3)  | 6.1 (4.1 to 8.5) | -0.3 (-0.5 to 0.2)  | 229.8 (105.4 to 373.5) | 168.8 (116.2 to 237.4) | -0.3 (-0.5 to 0.3)  |
| Guyana                     | 26.1 (19.7 to 35.3)    | 22.9 (17.3 to 30.3)    | -0.1 (-0.2 to 0)    | 7.4 (6.2 to 9.2)   | 7.9 (6 to 10.1)  | 0.1 (-0.2 to 0.5)   | 210.3 (173.3 to 254)   | 211.9 (157.1 to 276.1) | 0 (-0.3 to 0.4)     |
| Haiti                      | 21.7 (16.1 to 29)      | 24.2 (18.4 to 32.1)    | 0.1 (0 to 0.3)      | 9 (5.2 to 14.1)    | 7.9 (4.6 to 12)  | -0.1 (-0.4 to 0.2)  | 258.8 (141.8 to 421.7) | 230 (127.1 to 380.7)   | -0.1 (-0.4 to 0.3)  |
| Honduras                   | 25.2 (17.5 to 35.8)    | 30 (21.7 to 41.7)      | 0.2 (0 to 0.4)      | 4.5 (3.1 to 6.2)   | 5.4 (3.6 to 7.5) | 0.2 (-0.1 to 0.6)   | 110.8 (78.9 to 147.6)  | 118.6 (74.8 to 163.8)  | 0.1 (-0.2 to 0.5)   |
| Hungary                    | 35.2 (24.2 to 49.9)    | 32.4 (21.1 to 47)      | -0.1 (-0.2 to 0.1)  | 14.6 (8.4 to 16.5) | 3.7 (2.6 to 7.8) | -0.7 (-0.8 to -0.2) | 247.5 (149.9 to 279.3) | 62.7 (44.4 to 124.4)   | -0.7 (-0.8 to -0.2) |
| Iceland                    | 31 (23.6 to 39.9)      | 25.3 (20 to 32)        | -0.2 (-0.3 to 0)    | 2.1 (1.5 to 2.4)   | 1.2 (0.9 to 1.4) | -0.4 (-0.5 to -0.2) | 40.6 (30.7 to 46.5)    | 21.4 (18.1 to 25.9)    | -0.5 (-0.6 to -0.3) |
| India                      | 1.1 (0.8 to 1.6)       | 1.2 (0.8 to 1.6)       | 0 (0 to 0.1)        | 0.3 (0.2 to 0.4)   | 0.2 (0.2 to 0.3) | -0.1 (-0.4 to 0.3)  | 5.7 (3.5 to 9.2)       | 5.3 (3.9 to 7.2)       | -0.1 (-0.3 to 0.3)  |
| Indonesia                  | 36.4 (27.8 to 47.3)    | 40.4 (30.9 to 52.6)    | 0.1 (0.1 to 0.2)    | 3.3 (2.6 to 4.5)   | 4 (2.8 to 5.3)   | 0.2 (-0.1 to 0.6)   | 76.3 (58.9 to 120.8)   | 79.4 (56.3 to 110.7)   | 0 (-0.3 to 0.4)     |
| Iran (Islamic Republic of) | 19.9 (15.1 to 25.8)    | 20.1 (15.3 to 25.9)    | 0 (0 to 0)          | 2.1 (1.6 to 2.9)   | 1.5 (1.1 to 1.9) | -0.3 (-0.5 to 0)    | 58.4 (45.1 to 77.1)    | 38 (27.6 to 46.7)      | -0.3 (-0.6 to -0.1) |
| Iraq                       | 47.3 (36.8 to 61.3)    | 46.6 (35.9 to 59.5)    | 0 (-0.1 to 0.1)     | 5.1 (3.7 to 7.6)   | 4.5 (3.3 to 6.7) | -0.1 (-0.4 to 0.2)  | 157.6 (116.7 to 219.9) | 117.5 (88.7 to 163.9)  | -0.3 (-0.5 to 0.1)  |
| Ireland                    | 69.6 (53.4 to 90.2)    | 50.6 (38.8 to 64.7)    | -0.3 (-0.3 to -0.2) | 11.9 (5.9 to 13.7) | 3.3 (2.7 to 4.6) | -0.7 (-0.8 to -0.4) | 178.5 (107.4 to 200.2) | 53.7 (44.5 to 75.5)    | -0.7 (-0.8 to -0.4) |
| Israel                     | 40.3 (31.2 to 51.4)    | 31 (24.1 to 39.3)      | -0.2 (-0.3 to -0.1) | 2.9 (2.5 to 3.7)   | 1.4 (1.1 to 2.6) | -0.5 (-0.6 to -0.3) | 73.8 (60.1 to 81.7)    | 31.9 (27 to 46.7)      | -0.6 (-0.7 to -0.3) |
| Italy                      | 105.5 (73.9 to 144.6)  | 132.5 (96.5 to 173.7)  | 0.3 (0.1 to 0.5)    | 25.5 (6.3 to 30.3) | 3.9 (3.2 to 5.1) | -0.8 (-0.9 to -0.3) | 322.3 (121 to 370.9)   | 67.7 (57.1 to 95.8)    | -0.8 (-0.8 to -0.3) |
| Jamaica                    | 28.8 (22.7 to 36.5)    | 33.1 (25.7 to 41.6)    | 0.2 (0 to 0.3)      | 3.6 (2.9 to 4.2)   | 3.2 (2.6 to 4.2) | -0.1 (-0.3 to 0.2)  | 104 (82.1 to 121.3)    | 93 (71.9 to 118.6)     | -0.1 (-0.3 to 0.2)  |

|                                  |                        |                        |                    |                     |                   |                     |                        |                        |                     |
|----------------------------------|------------------------|------------------------|--------------------|---------------------|-------------------|---------------------|------------------------|------------------------|---------------------|
| Japan                            | 80.2 (60.5 to 105.2)   | 72.5 (57.9 to 89.3)    | -0.1 (-0.2 to 0)   | 4.7 (2.4 to 5.3)    | 2 (1.4 to 2.2)    | -0.6 (-0.6 to -0.3) | 102.8 (73.9 to 111.2)  | 49.7 (42.6 to 57.1)    | -0.5 (-0.6 to -0.3) |
| Jordan                           | 10.3 (7.9 to 13)       | 11 (8.4 to 13.9)       | 0.1 (0 to 0.2)     | 1.1 (0.7 to 1.4)    | 0.6 (0.4 to 0.8)  | -0.5 (-0.7 to -0.2) | 29 (18.1 to 38.4)      | 14.1 (11.1 to 19.1)    | -0.5 (-0.7 to -0.2) |
| Kazakhstan                       | 68.5 (50.8 to 91.7)    | 64.7 (47.4 to 86.4)    | -0.1 (-0.1 to 0.1) | 3 (1.7 to 8.5)      | 24 (7.7 to 31)    | 7 (0.1 to 14.5)     | 104.5 (61.3 to 289.9)  | 750.8 (266 to 984.3)   | 6.2 (0.1 to 12.6)   |
| Kenya                            | 223.2 (147.8 to 316.9) | 215.8 (143.5 to 305.3) | 0 (-0.1 to 0)      | 3.2 (2.2 to 4.2)    | 3.3 (2.1 to 4.5)  | 0 (-0.1 to 0.2)     | 114.5 (82.6 to 143.9)  | 109.6 (73.2 to 149.4)  | 0 (-0.2 to 0.2)     |
| Kiribati                         | 12 (8.5 to 16.7)       | 12.6 (8.9 to 17.2)     | 0 (-0.1 to 0.2)    | 2.6 (1.2 to 3.5)    | 2.4 (1 to 3.4)    | -0.1 (-0.3 to 0.2)  | 85.4 (37.2 to 122.7)   | 77.9 (29.4 to 120.4)   | -0.1 (-0.4 to 0.3)  |
| Kuwait                           | 20.7 (15.4 to 26.8)    | 21.1 (15.9 to 27.6)    | 0 (-0.1 to 0.1)    | 1.5 (1.3 to 1.8)    | 1 (0.8 to 1.3)    | -0.3 (-0.5 to -0.2) | 46.5 (39.5 to 54.4)    | 26.2 (20.8 to 33)      | -0.4 (-0.6 to -0.3) |
| Kyrgyzstan                       | 2.7 (2 to 3.6)         | 3 (2.2 to 3.9)         | 0.1 (0 to 0.2)     | 0.4 (0.3 to 0.7)    | 0.5 (0.4 to 0.6)  | 0.1 (-0.3 to 0.5)   | 14.2 (11.2 to 21)      | 16.2 (9.9 to 20.2)     | 0.1 (-0.4 to 0.7)   |
| Lao People's Democratic Republic | 22.6 (16.8 to 30.1)    | 25 (18.5 to 33.3)      | 0.1 (0 to 0.2)     | 3.2 (2 to 5.3)      | 3.7 (2.8 to 4.9)  | 0.1 (-0.2 to 0.7)   | 71.5 (43.5 to 149.6)   | 80.2 (57.9 to 116.4)   | 0.1 (-0.3 to 0.7)   |
| Latvia                           | 53.2 (39.7 to 71.2)    | 86.6 (63 to 117.3)     | 0.6 (0.4 to 0.9)   | 13.2 (10.2 to 15.2) | 7.7 (5.6 to 9.7)  | -0.4 (-0.6 to -0.2) | 500.2 (357.7 to 581.6) | 228.9 (171.4 to 293.9) | -0.5 (-0.7 to -0.3) |
| Lebanon                          | 28.6 (21.6 to 37.7)    | 30.4 (23.1 to 38.8)    | 0.1 (0 to 0.2)     | 2.9 (2.1 to 4.3)    | 1.9 (1.3 to 2.7)  | -0.4 (-0.5 to -0.1) | 77.7 (55.3 to 125.3)   | 48.6 (34.7 to 77.7)    | -0.4 (-0.5 to -0.1) |
| Lesotho                          | 193.6 (122.8 to 276.8) | 194.1 (125.1 to 281.3) | 0 (-0.1 to 0.1)    | 15 (11.1 to 21.3)   | 15 (10.7 to 22.7) | 0 (-0.3 to 0.4)     | 325.7 (246.2 to 448.1) | 327.4 (234.7 to 489.4) | 0 (-0.3 to 0.4)     |
| Liberia                          | 226 (146.8 to 322.2)   | 251.7 (166.1 to 356.4) | 0.1 (0 to 0.2)     | 7.7 (4.1 to 11.3)   | 5.1 (3.5 to 7.4)  | -0.3 (-0.6 to 0.1)  | 201 (112.9 to 284.6)   | 137 (97 to 196.1)      | -0.3 (-0.5 to 0.2)  |
| Libya                            | 21.5 (16.5 to 28.5)    | 24.7 (18.8 to 32.9)    | 0.1 (0 to 0.3)     | 2.9 (2 to 4.2)      | 1.7 (1.2 to 2.5)  | -0.4 (-0.6 to 0)    | 153.1 (93 to 252.3)    | 70.7 (48.6 to 101.6)   | -0.5 (-0.7 to -0.1) |
| Lithuania                        | 22.1 (15.8 to 30.4)    | 24.2 (17.2 to 33.4)    | 0.1 (0 to 0.2)     | 4.4 (3.7 to 5.2)    | 4.7 (2.8 to 6.1)  | 0.1 (-0.3 to 0.4)   | 156.9 (132.1 to 184.9) | 153.8 (94.5 to 199.8)  | 0 (-0.4 to 0.3)     |
| Luxembourg                       | 83.7 (63.1 to 110.4)   | 80.3 (62.5 to 99.9)    | 0 (-0.2 to 0.2)    | 6.3 (4.4 to 7.2)    | 3.1 (2.5 to 4)    | -0.5 (-0.6 to -0.2) | 112.3 (85 to 124.2)    | 51.4 (42.4 to 68)      | -0.5 (-0.6 to -0.3) |
| Madagascar                       | 255.1 (166.3 to 359.6) | 271.7 (178.4 to 380.8) | 0.1 (0 to 0.2)     | 6.7 (4.5 to 8.5)    | 5.6 (3.7 to 7.9)  | -0.2 (-0.4 to 0.2)  | 267.4 (178.4 to 339.7) | 213.2 (142.8 to 316.1) | -0.2 (-0.4 to 0.1)  |
| Malawi                           | 269.8 (174.7 to 387.6) | 284.2 (187.8 to 400.8) | 0.1 (-0.1 to 0.2)  | 4.1 (2.7 to 5.2)    | 3.7 (2.5 to 4.9)  | -0.1 (-0.4 to 0.3)  | 164.3 (109.7 to 219.8) | 138.4 (95.3 to 183.3)  | -0.2 (-0.4 to 0.2)  |

|                                  |                        |                        |                     |                    |                    |                     |                        |                        |                     |
|----------------------------------|------------------------|------------------------|---------------------|--------------------|--------------------|---------------------|------------------------|------------------------|---------------------|
| Malaysia                         | 70.8 (53.5 to 93.4)    | 81 (61.4 to 107.5)     | 0.1 (0 to 0.3)      | 3.3 (2.6 to 4.5)   | 2.9 (2.2 to 4)     | -0.1 (-0.3 to 0.1)  | 96.6 (78.6 to 124)     | 84.3 (62 to 108.2)     | -0.1 (-0.3 to 0.1)  |
| Maldives                         | 23.6 (17.7 to 31.2)    | 24.9 (18.6 to 33.1)    | 0.1 (-0.1 to 0.2)   | 1.4 (0.8 to 2.7)   | 1.3 (1 to 1.7)     | -0.1 (-0.5 to 0.8)  | 44.5 (23.9 to 78.3)    | 32.9 (23.9 to 42.3)    | -0.3 (-0.6 to 0.5)  |
| Mali                             | 190.7 (119.7 to 270.6) | 202.6 (129.3 to 289.5) | 0.1 (-0.1 to 0.2)   | 8.4 (4.4 to 13.4)  | 6.2 (4.5 to 8.3)   | -0.3 (-0.5 to 0.3)  | 212.2 (111.1 to 316.4) | 158.9 (117.3 to 215.3) | -0.3 (-0.5 to 0.3)  |
| Malta                            | 76.1 (57.8 to 98.1)    | 66.6 (50.8 to 84.4)    | -0.1 (-0.2 to 0)    | 10.3 (6.6 to 11.9) | 2.9 (2.3 to 4.5)   | -0.7 (-0.8 to -0.4) | 168.1 (121 to 187.7)   | 57 (46.6 to 80.5)      | -0.7 (-0.7 to -0.4) |
| Marshall Islands                 | 19.5 (14.4 to 26.6)    | 20.5 (14.9 to 28)      | 0 (-0.1 to 0.2)     | 4.2 (2.7 to 6.3)   | 4 (2.4 to 6)       | 0 (-0.3 to 0.3)     | 114 (70.9 to 173.8)    | 113.8 (66.2 to 174.4)  | 0 (-0.3 to 0.4)     |
| Mauritania                       | 238.7 (156.5 to 336.6) | 254.9 (166.7 to 358.1) | 0.1 (-0.1 to 0.2)   | 8 (4.2 to 10.6)    | 4.7 (3.2 to 6.4)   | -0.4 (-0.6 to 0.1)  | 206.7 (115.3 to 270.8) | 125.7 (84.7 to 172.6)  | -0.4 (-0.6 to 0.1)  |
| Mauritius                        | 35.5 (26.9 to 45.9)    | 33.3 (25.4 to 42.9)    | -0.1 (-0.2 to 0)    | 1.5 (1.2 to 2.9)   | 3.1 (2 to 3.9)     | 1 (-0.2 to 2)       | 46.1 (36.7 to 85.2)    | 90.2 (56.7 to 116)     | 1 (-0.2 to 2)       |
| Mexico                           | 14 (10.3 to 18.4)      | 13.2 (9.9 to 17.1)     | -0.1 (-0.1 to 0)    | 1 (0.9 to 1.6)     | 1.1 (0.9 to 1.3)   | 0.1 (-0.2 to 0.4)   | 31.7 (28.8 to 43)      | 37.3 (28.2 to 44.1)    | 0.2 (-0.3 to 0.5)   |
| Micronesia (Federated States of) | 19.5 (14.1 to 26.5)    | 19.3 (14.2 to 26)      | 0 (-0.1 to 0.1)     | 4.1 (2.5 to 6)     | 4 (2.1 to 5.9)     | 0 (-0.3 to 0.4)     | 113.5 (66.6 to 176.5)  | 109.9 (51.9 to 175.1)  | 0 (-0.4 to 0.3)     |
| Monaco                           | 152.7 (116.8 to 197)   | 107.7 (81.9 to 139.8)  | -0.3 (-0.4 to -0.2) | 11.3 (7.3 to 14.5) | 8.5 (6.2 to 10.6)  | -0.2 (-0.4 to 0)    | 217.4 (149 to 273.7)   | 151.5 (112.3 to 192.2) | -0.3 (-0.5 to -0.1) |
| Mongolia                         | 26.8 (19.7 to 35.8)    | 28 (20.2 to 37.2)      | 0 (-0.1 to 0.2)     | 8.6 (6.4 to 11.5)  | 7.5 (5.5 to 10)    | -0.1 (-0.4 to 0.3)  | 229.7 (160.2 to 342.8) | 193.3 (141.2 to 291.6) | -0.2 (-0.4 to 0.3)  |
| Montenegro                       | 111 (80.7 to 147.9)    | 92.7 (66.8 to 125.8)   | -0.2 (-0.3 to -0.1) | 12.6 (7 to 25.5)   | 20 (10.5 to 30)    | 0.6 (0 to 1.5)      | 201.4 (124.3 to 387.7) | 274.3 (162.6 to 418.6) | 0.4 (-0.1 to 1)     |
| Morocco                          | 17.2 (12.9 to 22.5)    | 18 (13.5 to 23.7)      | 0 (0 to 0.2)        | 2.5 (1.5 to 3.9)   | 2.3 (1.6 to 3.5)   | -0.1 (-0.3 to 0.3)  | 68.1 (41.2 to 124)     | 54 (37 to 87.8)        | -0.2 (-0.5 to 0.2)  |
| Mozambique                       | 255.3 (167.1 to 361.9) | 300.1 (202.2 to 418.8) | 0.2 (0 to 0.3)      | 3.5 (2.7 to 4.5)   | 3.9 (2.8 to 5.2)   | 0.1 (-0.2 to 0.5)   | 135.4 (102.8 to 175.4) | 145.1 (109.6 to 186.9) | 0.1 (-0.2 to 0.5)   |
| Myanmar                          | 28.4 (21 to 37.6)      | 29.3 (21.3 to 38.7)    | 0 (-0.1 to 0.2)     | 3.5 (2.2 to 5.7)   | 3.4 (2.6 to 4.5)   | 0 (-0.3 to 0.4)     | 89.4 (52.7 to 185.7)   | 80.4 (59 to 122.2)     | -0.1 (-0.5 to 0.4)  |
| Namibia                          | 228.8 (145.4 to 322)   | 222.2 (141.1 to 314.2) | 0 (-0.1 to 0.1)     | 15 (11.3 to 19.7)  | 12.2 (9.2 to 17.3) | -0.2 (-0.4 to 0.1)  | 329 (243 to 423.9)     | 263 (196.4 to 375.6)   | -0.2 (-0.4 to 0.1)  |

|                          |                        |                        |                     |                   |                     |                     |                        |                        |                     |
|--------------------------|------------------------|------------------------|---------------------|-------------------|---------------------|---------------------|------------------------|------------------------|---------------------|
| Nauru                    | 21.9 (16.2 to 29.9)    | 22 (16 to 30.1)        | 0 (-0.1 to 0.1)     | 4 (2.4 to 5.8)    | 4 (2.4 to 6)        | 0 (-0.2 to 0.3)     | 120.5 (71.2 to 181.8)  | 121.7 (72.9 to 182.4)  | 0 (-0.2 to 0.3)     |
| Nepal                    | 0.8 (0.6 to 1.1)       | 0.8 (0.5 to 1.1)       | 0 (-0.1 to 0.1)     | 0.2 (0.1 to 0.4)  | 0.3 (0.2 to 0.5)    | 0.3 (-0.1 to 1.1)   | 4.9 (2.4 to 8.7)       | 5.9 (3.5 to 9.5)       | 0.2 (-0.2 to 0.9)   |
| Netherlands              | 58 (46.3 to 71.7)      | 42.3 (33 to 53.7)      | -0.3 (-0.4 to -0.2) | 7.2 (4.2 to 8.5)  | 2.9 (2.3 to 4.3)    | -0.6 (-0.7 to -0.1) | 111 (77.4 to 126.3)    | 45.5 (37 to 70.9)      | -0.6 (-0.7 to -0.2) |
| New Zealand              | 61.5 (46.6 to 81.3)    | 46.9 (36.6 to 59.3)    | -0.2 (-0.4 to -0.1) | 4.2 (2.9 to 4.8)  | 2.3 (2 to 2.6)      | -0.5 (-0.5 to -0.2) | 121.4 (75.2 to 138.4)  | 62 (49.7 to 68.8)      | -0.5 (-0.6 to -0.3) |
| Nicaragua                | 14.9 (10.6 to 20.5)    | 18.3 (13.6 to 24.4)    | 0.2 (0.1 to 0.4)    | 1.9 (1.5 to 2.3)  | 2.3 (1.6 to 2.8)    | 0.2 (-0.1 to 0.5)   | 53.4 (40.9 to 67.2)    | 51.3 (37.5 to 64)      | 0 (-0.3 to 0.2)     |
| Niger                    | 184.9 (120 to 266.8)   | 204.9 (134.1 to 292.4) | 0.1 (0 to 0.2)      | 8.1 (4.1 to 14.1) | 5.9 (4.1 to 8.4)    | -0.3 (-0.5 to 0.2)  | 211.7 (108.4 to 339.6) | 154.9 (107.2 to 220.3) | -0.3 (-0.5 to 0.2)  |
| Nigeria                  | 204.1 (142.7 to 274.1) | 226.8 (158 to 304.7)   | 0.1 (0.1 to 0.1)    | 8.1 (4.5 to 11.9) | 4.7 (3.3 to 6.1)    | -0.4 (-0.6 to 0)    | 203.5 (116.6 to 293.3) | 124.9 (92 to 161.4)    | -0.4 (-0.6 to 0)    |
| Niue                     | 27.6 (20.4 to 37.3)    | 28.8 (21 to 38.4)      | 0 (-0.1 to 0.2)     | 3.2 (2.2 to 4.2)  | 2.9 (1.7 to 3.8)    | -0.1 (-0.3 to 0.2)  | 96.3 (64.7 to 128.2)   | 87.7 (54.2 to 120.8)   | -0.1 (-0.4 to 0.3)  |
| North Macedonia          | 98.2 (71.1 to 131.4)   | 73.7 (53.3 to 99.9)    | -0.2 (-0.3 to -0.2) | 20.9 (11.6 to 28) | 21.7 (11.4 to 31.6) | 0 (-0.3 to 0.6)     | 317.3 (214.5 to 394.9) | 335 (191.5 to 450.6)   | 0.1 (-0.2 to 0.4)   |
| Northern Mariana Islands | 67.4 (49.5 to 89.9)    | 67.6 (49.9 to 89.6)    | 0 (-0.1 to 0.1)     | 4.3 (3.2 to 6.8)  | 4 (3 to 6.1)        | -0.1 (-0.3 to 0.3)  | 123 (91.8 to 188.8)    | 116.5 (87.1 to 172.6)  | -0.1 (-0.3 to 0.3)  |
| Norway                   | 53 (40.8 to 68.6)      | 52.5 (41.5 to 65.1)    | 0 (-0.1 to 0.1)     | 1.6 (1.2 to 3.8)  | 1.7 (1.4 to 2.6)    | 0.1 (-0.3 to 0.3)   | 45.9 (39.9 to 74.2)    | 39 (34.2 to 45.8)      | -0.1 (-0.4 to 0)    |
| Oman                     | 14.9 (11.7 to 19.3)    | 15.7 (11.8 to 21.2)    | 0.1 (-0.1 to 0.2)   | 1.7 (1.1 to 3)    | 2.2 (1.1 to 3.1)    | 0.3 (-0.5 to 1.6)   | 44.1 (27.1 to 74.8)    | 54.7 (27.7 to 77.4)    | 0.2 (-0.6 to 1.6)   |
| Pakistan                 | 1.1 (0.7 to 1.5)       | 1.1 (0.8 to 1.5)       | 0 (-0.1 to 0.1)     | 0.3 (0.2 to 0.5)  | 0.3 (0.2 to 0.4)    | 0 (-0.3 to 0.4)     | 6.4 (3.5 to 10.4)      | 6.8 (4.6 to 9.6)       | 0.1 (-0.2 to 0.5)   |
| Palau                    | 11.6 (8.2 to 16)       | 11.6 (8.3 to 15.9)     | 0 (-0.1 to 0.1)     | 1 (0.7 to 1.3)    | 0.8 (0.6 to 1.1)    | -0.2 (-0.4 to 0.2)  | 28.8 (19.9 to 40.7)    | 23.9 (17 to 31.7)      | -0.2 (-0.4 to 0.2)  |
| Palestine                | 38.4 (29.6 to 49.1)    | 40.3 (31 to 51.5)      | 0.1 (0 to 0.1)      | 5.3 (2.9 to 7.9)  | 3 (2.1 to 3.7)      | -0.4 (-0.6 to -0.1) | 133.6 (75.6 to 193.7)  | 71.9 (55.2 to 89.7)    | -0.5 (-0.6 to -0.1) |
| Panama                   | 50 (36.5 to 68.2)      | 52.5 (38.4 to 70)      | 0.1 (-0.1 to 0.2)   | 3 (2.6 to 3.8)    | 4.3 (2.7 to 5.8)    | 0.4 (-0.2 to 1)     | 83.9 (75.5 to 104.9)   | 115.4 (71.5 to 156.3)  | 0.4 (-0.2 to 0.9)   |
| Papua New Guinea         | 17.6 (12.8 to 23.7)    | 18.4 (13.4 to 25.1)    | 0.1 (-0.1 to 0.2)   | 2.7 (1.5 to 4.5)  | 3.1 (1.9 to 4.8)    | 0.2 (-0.1 to 0.6)   | 82.8 (42.6 to 144.4)   | 95 (52.4 to 155.9)     | 0.1 (-0.2 to 0.6)   |
| Paraguay                 | 33.3 (23.8 to 45.3)    | 36.5 (26.8 to 50.1)    | 0.1 (0 to 0.2)      | 4.2 (2.4 to 5.3)  | 2.9 (2.2 to 4.1)    | -0.3 (-0.5 to 0.3)  | 89.1 (59.3 to 109.5)   | 63.6 (47.3 to 91.2)    | -0.3 (-0.5 to 0.2)  |
| Peru                     | 17.8 (12.7 to 24.5)    | 21.3 (15.9 to 28)      | 0.2 (0.1 to 0.4)    | 1.7 (1.2 to 2.1)  | 1 (0.7 to 1.5)      | -0.4 (-0.6 to 0)    | 55.8 (36.3 to 71.2)    | 30.2 (21.5 to 43)      | -0.5 (-0.7 to 0)    |
| Philippines              | 34.8 (26.3 to 44.9)    | 35 (26.5 to 44.8)      | 0 (0 to 0)          | 4.4 (1.4 to 6)    | 4.8 (1.8 to 6.6)    | 0.1 (-0.1 to 0.5)   | 61.2 (32.9 to 75)      | 88 (49.8 to 111.9)     | 0.4 (0.1 to 0.9)    |

|                                  |                        |                        |                     |                     |                     |                     |                        |                        |                     |
|----------------------------------|------------------------|------------------------|---------------------|---------------------|---------------------|---------------------|------------------------|------------------------|---------------------|
| Poland                           | 131.3 (94.6 to 175.7)  | 141.9 (105.6 to 185.2) | 0.1 (0 to 0.2)      | 13.1 (10.5 to 14)   | 11.7 (7.1 to 14.2)  | -0.1 (-0.4 to 0)    | 246.4 (211.5 to 265.8) | 182.7 (127.6 to 218.5) | -0.3 (-0.4 to -0.1) |
| Portugal                         | 43.7 (33 to 57.4)      | 29.6 (23.3 to 38.4)    | -0.3 (-0.4 to -0.2) | 3.7 (3 to 4.1)      | 2.2 (1.7 to 2.5)    | -0.4 (-0.5 to -0.3) | 73 (60.7 to 79)        | 41.5 (29.7 to 47.1)    | -0.4 (-0.6 to -0.3) |
| Puerto Rico                      | 43.2 (32.8 to 56.4)    | 38.6 (29.4 to 50.8)    | -0.1 (-0.2 to 0)    | 4.4 (2.6 to 5.2)    | 1.9 (1.4 to 2.6)    | -0.6 (-0.7 to -0.1) | 108.3 (75.1 to 122.5)  | 47.5 (35.3 to 71.9)    | -0.6 (-0.7 to -0.2) |
| Qatar                            | 64.4 (50.5 to 81.2)    | 62.6 (46.6 to 81.8)    | 0 (-0.2 to 0.2)     | 4.2 (2.5 to 6)      | 3.5 (2.2 to 4.9)    | -0.2 (-0.5 to 0.3)  | 111.5 (78.3 to 149.7)  | 65.8 (46.4 to 89.1)    | -0.4 (-0.6 to -0.1) |
| Republic of Korea                | 34.1 (25.8 to 44.6)    | 32.9 (25.3 to 42.4)    | 0 (-0.1 to 0.1)     | 1.9 (1.4 to 2.6)    | 1.3 (0.9 to 1.5)    | -0.3 (-0.6 to 0)    | 54.1 (40.3 to 80.5)    | 32 (23.8 to 37.5)      | -0.4 (-0.6 to -0.2) |
| Republic of Moldova              | 14.6 (11.1 to 19.2)    | 26.7 (20.2 to 35.6)    | 0.8 (0.6 to 1)      | 2.8 (2.4 to 4.1)    | 2 (1.5 to 2.8)      | -0.3 (-0.5 to -0.1) | 105.4 (92.1 to 145.9)  | 66.3 (51.9 to 92.7)    | -0.4 (-0.5 to -0.2) |
| Romania                          | 91.2 (65.8 to 122.9)   | 75.8 (51.6 to 105.5)   | -0.2 (-0.3 to 0)    | 25.7 (15.3 to 31.4) | 17.6 (11.7 to 21.8) | -0.3 (-0.5 to -0.1) | 381.2 (268.6 to 447.8) | 323.5 (202.8 to 414.7) | -0.2 (-0.3 to 0.1)  |
| Russian Federation               | 25.4 (19.8 to 32.6)    | 23.2 (17.8 to 30.2)    | -0.1 (-0.1 to 0)    | 3.2 (2.3 to 6.6)    | 9.6 (3.5 to 12.3)   | 2 (-0.3 to 3.9)     | 89.1 (59.9 to 225.4)   | 303.7 (125.3 to 394.5) | 2.4 (-0.3 to 5.2)   |
| Rwanda                           | 228.6 (150.6 to 325.7) | 234 (154.2 to 328.2)   | 0 (-0.1 to 0.1)     | 5.6 (3.6 to 7.9)    | 4 (2.7 to 5.3)      | -0.3 (-0.5 to 0.1)  | 200.2 (126.5 to 276.7) | 137.8 (95.7 to 185.5)  | -0.3 (-0.6 to 0.1)  |
| Saint Kitts and Nevis            | 61.4 (46.6 to 81.3)    | 63.6 (48.3 to 83.7)    | 0 (-0.1 to 0.2)     | 12.8 (11.1 to 14.5) | 10.5 (8.3 to 12.8)  | -0.2 (-0.3 to 0)    | 333.7 (290.9 to 378.9) | 246.1 (187.7 to 312.3) | -0.3 (-0.4 to 0)    |
| Saint Lucia                      | 51.7 (38.9 to 67.6)    | 54.1 (40.8 to 69.6)    | 0 (-0.1 to 0.2)     | 8.9 (7.5 to 10.8)   | 7.6 (6.1 to 9.2)    | -0.1 (-0.4 to 0.1)  | 212 (182.1 to 259.2)   | 178.2 (142.4 to 216.6) | -0.2 (-0.4 to 0.1)  |
| Saint Vincent and the Grenadines | 15.7 (11.7 to 20.9)    | 17.3 (12.9 to 22.7)    | 0.1 (0 to 0.2)      | 2.7 (2.4 to 3.7)    | 3 (2.4 to 3.6)      | 0.1 (-0.3 to 0.4)   | 72.6 (63.5 to 93.5)    | 72.1 (56.8 to 86.9)    | 0 (-0.3 to 0.2)     |
| Samoa                            | 26.5 (19.6 to 35.4)    | 26.9 (19.8 to 35.8)    | 0 (-0.1 to 0.1)     | 3.4 (2.3 to 4.5)    | 3.2 (1.9 to 4.3)    | -0.1 (-0.3 to 0.3)  | 95.3 (64.2 to 131.1)   | 87.6 (53.1 to 122.2)   | -0.1 (-0.4 to 0.3)  |
| San Marino                       | 103.2 (78.5 to 133.8)  | 75.2 (56.6 to 96.9)    | -0.3 (-0.3 to -0.2) | 5.9 (3.7 to 7.6)    | 4.8 (3.1 to 6.6)    | -0.2 (-0.5 to 0.3)  | 100.2 (69.8 to 123.9)  | 76.9 (51.3 to 111.1)   | -0.2 (-0.5 to 0.2)  |
| Sao Tome and Principe            | 230.2 (150.2 to 324.1) | 261 (169.5 to 366.9)   | 0.1 (0 to 0.3)      | 6.1 (3.3 to 8.6)    | 5.1 (3.6 to 6.5)    | -0.2 (-0.4 to 0.3)  | 163.4 (97.3 to 225.4)  | 140.8 (103.7 to 181.3) | -0.1 (-0.4 to 0.4)  |



|                 |                        |                        |                     |                     |                    |                     |                         |                        |                     |
|-----------------|------------------------|------------------------|---------------------|---------------------|--------------------|---------------------|-------------------------|------------------------|---------------------|
| Saudi Arabia    | 63.2 (47 to 83.9)      | 76.4 (56.9 to 100.8)   | 0.2 (0.1 to 0.4)    | 7.5 (5 to 11.2)     | 5 (3.2 to 6.3)     | -0.3 (-0.6 to 0)    | 182.9 (131.1 to 265.9)  | 118.8 (78.7 to 151.1)  | -0.4 (-0.6 to -0.1) |
| Senegal         | 265 (174.8 to 363.1)   | 266.6 (176.8 to 370.6) | 0 (-0.1 to 0.1)     | 6.9 (3.6 to 9.9)    | 5.1 (3.5 to 6.7)   | -0.3 (-0.5 to 0.2)  | 183.8 (105.1 to 252.4)  | 142.4 (101.9 to 183.5) | -0.2 (-0.5 to 0.2)  |
| Serbia          | 75.9 (53.4 to 102.9)   | 46.8 (32.3 to 63.1)    | -0.4 (-0.5 to -0.2) | 19.6 (12.2 to 25.4) | 19 (10.1 to 26.2)  | 0 (-0.3 to 0.3)     | 306.7 (219.8 to 372.7)  | 260.3 (149.3 to 354.5) | -0.2 (-0.4 to 0.1)  |
| Seychelles      | 68.8 (51.2 to 92.2)    | 64.4 (48.6 to 85.6)    | -0.1 (-0.2 to 0.1)  | 8.8 (7 to 11.1)     | 7.6 (6.1 to 9.7)   | -0.1 (-0.3 to 0.1)  | 228.4 (182.8 to 289.1)  | 197.4 (158.1 to 250.6) | -0.1 (-0.3 to 0.1)  |
| Sierra Leone    | 238 (155.2 to 338.7)   | 248.6 (162.8 to 351.9) | 0 (-0.1 to 0.2)     | 7.2 (3.8 to 10.5)   | 5.3 (3.6 to 7.6)   | -0.3 (-0.5 to 0.2)  | 192.1 (108.1 to 273.6)  | 154.2 (108.2 to 218.4) | -0.2 (-0.5 to 0.3)  |
| Singapore       | 32.9 (25.3 to 42.6)    | 25.4 (19.6 to 33)      | -0.2 (-0.3 to -0.1) | 2.9 (2.5 to 4.1)    | 1.4 (1 to 2)       | -0.5 (-0.7 to -0.4) | 96.5 (80 to 130.7)      | 38.7 (29.9 to 49)      | -0.6 (-0.8 to -0.5) |
| Slovakia        | 42.5 (31.5 to 56.1)    | 53.5 (40.1 to 69.6)    | 0.3 (0 to 0.6)      | 4.1 (2.9 to 8)      | 3.6 (2.5 to 6.1)   | -0.1 (-0.4 to 0.2)  | 111.6 (94.2 to 162.7)   | 86.3 (64.2 to 114.6)   | -0.2 (-0.4 to 0.1)  |
| Slovenia        | 221.5 (154.1 to 304.7) | 154.7 (114.9 to 200.4) | -0.3 (-0.4 to -0.1) | 55.9 (9.9 to 77.2)  | 14.4 (8.3 to 18.5) | -0.7 (-0.8 to 0)    | 764.8 (188.9 to 1066.7) | 196.2 (141.9 to 249.4) | -0.7 (-0.8 to -0.1) |
| Solomon Islands | 15.4 (11 to 21.2)      | 15.1 (10.8 to 20.5)    | 0 (-0.1 to 0.1)     | 3.6 (2 to 5.9)      | 3.7 (2.1 to 5.7)   | 0 (-0.3 to 0.4)     | 109.5 (56.8 to 190.8)   | 108.4 (57.3 to 184.1)  | 0 (-0.3 to 0.3)     |
| Somalia         | 222.1 (144.9 to 322.8) | 231.2 (153.1 to 326.3) | 0 (-0.1 to 0.2)     | 5.1 (3.2 to 7.4)    | 4.1 (2.7 to 6.2)   | -0.2 (-0.4 to 0.2)  | 190.8 (116.5 to 277.7)  | 153.6 (103.6 to 217.6) | -0.2 (-0.4 to 0.2)  |
| South Africa    | 273.6 (182.9 to 383.6) | 243.8 (162.2 to 336.9) | -0.1 (-0.1 to -0.1) | 11.7 (9 to 14.2)    | 10.5 (8.7 to 13.3) | -0.1 (-0.2 to 0.1)  | 283.5 (229.1 to 330.4)  | 230.1 (192.2 to 287.1) | -0.2 (-0.3 to 0)    |
| South Sudan     | 246.9 (163.3 to 353.3) | 256.8 (172.6 to 362)   | 0 (-0.1 to 0.2)     | 4.6 (2.4 to 6.6)    | 3.1 (1.9 to 4.7)   | -0.3 (-0.5 to 0)    | 181.2 (100.3 to 259.1)  | 126.1 (79.7 to 185.6)  | -0.3 (-0.5 to 0)    |
| Spain           | 118.7 (88.7 to 154.2)  | 79.5 (59.7 to 102.7)   | -0.3 (-0.4 to -0.2) | 9.8 (6 to 11.2)     | 5 (4.1 to 5.7)     | -0.5 (-0.6 to -0.3) | 158.8 (126.5 to 173.7)  | 91.8 (74.8 to 103.9)   | -0.4 (-0.5 to -0.3) |

|                            |                        |                        |                     |                    |                    |                     |                        |                        |                     |
|----------------------------|------------------------|------------------------|---------------------|--------------------|--------------------|---------------------|------------------------|------------------------|---------------------|
| Sri Lanka                  | 114.1 (84.6 to 151.4)  | 122.3 (90.1 to 161.4)  | 0.1 (0 to 0.2)      | 14.5 (9.2 to 17.5) | 7 (4.8 to 10.8)    | -0.5 (-0.7 to -0.1) | 343.2 (229.7 to 406.3) | 179.9 (128.2 to 260.1) | -0.5 (-0.7 to -0.1) |
| Sudan                      | 12.8 (9.5 to 17.3)     | 14.3 (10.5 to 18.7)    | 0.1 (0 to 0.2)      | 2.8 (1.5 to 5)     | 2.2 (1.4 to 3.5)   | -0.2 (-0.5 to 0.2)  | 85.4 (39.4 to 193.3)   | 62.5 (38.2 to 107.7)   | -0.3 (-0.6 to 0.2)  |
| Suriname                   | 37 (28.2 to 49.5)      | 40.2 (30.6 to 52.6)    | 0.1 (-0.1 to 0.2)   | 5 (4.1 to 7.1)     | 5 (3.8 to 6.3)     | 0 (-0.3 to 0.3)     | 149.8 (120.6 to 199.3) | 139.9 (105.4 to 177.6) | -0.1 (-0.3 to 0.2)  |
| Sweden                     | 95.8 (76.2 to 118.6)   | 92.4 (72.3 to 118.7)   | 0 (-0.1 to 0.1)     | 3.8 (3 to 5.9)     | 2.2 (1.7 to 4.4)   | -0.4 (-0.5 to -0.2) | 106 (82 to 118.2)      | 50.9 (42.9 to 73.6)    | -0.5 (-0.6 to -0.3) |
| Switzerland                | 46.3 (35.3 to 59)      | 31 (25.8 to 37.6)      | -0.3 (-0.4 to -0.2) | 3.1 (2.5 to 3.9)   | 2.1 (1.7 to 3.2)   | -0.3 (-0.5 to -0.1) | 59.9 (50.7 to 71.7)    | 36.2 (31 to 50.4)      | -0.4 (-0.5 to -0.2) |
| Syrian Arab Republic       | 20.8 (15.4 to 27.7)    | 23.7 (17.5 to 31.6)    | 0.1 (0 to 0.3)      | 3.2 (2.2 to 4.8)   | 2.4 (1.7 to 3.7)   | -0.3 (-0.5 to 0.1)  | 99 (66.5 to 156.3)     | 62.3 (43.2 to 98.1)    | -0.4 (-0.6 to -0.1) |
| Taiwan (Province of China) | 43.2 (32.2 to 56)      | 38 (29.3 to 47.3)      | -0.1 (-0.2 to 0)    | 2.4 (1.8 to 2.6)   | 1.2 (0.9 to 1.6)   | -0.5 (-0.6 to -0.3) | 55.3 (45.1 to 60.1)    | 32.9 (25.1 to 43)      | -0.4 (-0.5 to -0.2) |
| Tajikistan                 | 4.6 (3.4 to 6.1)       | 4.5 (3.4 to 6)         | 0 (-0.1 to 0.1)     | 0.9 (0.6 to 1.2)   | 1.1 (0.7 to 1.4)   | 0.2 (-0.1 to 0.5)   | 29.2 (21.2 to 35.5)    | 31.5 (20.8 to 40.7)    | 0.1 (-0.2 to 0.4)   |
| Thailand                   | 17.7 (12.9 to 23.5)    | 19.3 (14.1 to 25.6)    | 0.1 (0 to 0.2)      | 0.6 (0.4 to 1.1)   | 0.6 (0.4 to 0.9)   | 0 (-0.4 to 0.7)     | 16.3 (10.6 to 29.5)    | 18.7 (13.3 to 25)      | 0.2 (-0.4 to 0.9)   |
| Timor-Leste                | 27.6 (20.7 to 36.6)    | 32.9 (24.4 to 43.6)    | 0.2 (0.1 to 0.3)    | 2.8 (1.8 to 4)     | 3.8 (2.6 to 5.2)   | 0.4 (-0.1 to 0.9)   | 58.9 (36.6 to 106.2)   | 76.7 (53.7 to 111.9)   | 0.3 (-0.1 to 0.9)   |
| Togo                       | 229.9 (150.5 to 324.6) | 232 (151.9 to 327.2)   | 0 (-0.1 to 0.1)     | 7.7 (4.2 to 10.8)  | 5.2 (3.7 to 7)     | -0.3 (-0.5 to 0.1)  | 201.5 (116.4 to 271.5) | 146.3 (107.4 to 195.2) | -0.3 (-0.5 to 0.1)  |
| Tokelau                    | 26.4 (19.5 to 35.1)    | 28.6 (21.2 to 37.9)    | 0.1 (0 to 0.2)      | 3.2 (2.1 to 4.3)   | 2.8 (1.7 to 3.8)   | -0.1 (-0.4 to 0.2)  | 89.3 (57.9 to 125)     | 77.7 (45.8 to 109.8)   | -0.1 (-0.4 to 0.3)  |
| Tonga                      | 26.5 (19.4 to 35.7)    | 26.3 (19.5 to 35.7)    | 0 (-0.1 to 0.1)     | 1.7 (1.3 to 2.1)   | 1.6 (1.1 to 2.1)   | -0.1 (-0.3 to 0.3)  | 49.3 (37.8 to 63.1)    | 47.7 (32.8 to 63.7)    | 0 (-0.3 to 0.3)     |
| Trinidad and Tobago        | 30.4 (23.2 to 39.3)    | 30.5 (23.3 to 40.6)    | 0 (-0.1 to 0.1)     | 4.8 (3.9 to 5.8)   | 3.7 (2.8 to 4.9)   | -0.2 (-0.4 to 0.1)  | 132.5 (112.7 to 155.7) | 106.4 (77.1 to 142)    | -0.2 (-0.4 to 0.1)  |
| Tunisia                    | 21.4 (15.8 to 28.2)    | 23.3 (17.6 to 30.5)    | 0.1 (0 to 0.2)      | 2.5 (1.9 to 3.7)   | 1.8 (1.2 to 2.8)   | -0.3 (-0.5 to 0)    | 70.2 (51.3 to 105.8)   | 44.1 (30.2 to 69.4)    | -0.4 (-0.6 to -0.1) |
| Turkey                     | 33.8 (25.9 to 43.9)    | 27.9 (22.6 to 34.2)    | -0.2 (-0.3 to 0)    | 2.6 (1.9 to 4)     | 1.3 (0.9 to 2.2)   | -0.5 (-0.7 to -0.2) | 87.6 (63.1 to 123.9)   | 41.6 (33.1 to 56.3)    | -0.5 (-0.7 to -0.3) |
| Turkmenistan               | 36.3 (26.9 to 48.7)    | 38.1 (28 to 51.4)      | 0 (-0.1 to 0.2)     | 17.5 (12.8 to 21)  | 13.2 (9.9 to 19.5) | -0.2 (-0.5 to 0.3)  | 611.8 (441.1 to 727.7) | 487.4 (370.6 to 674.7) | -0.2 (-0.4 to 0.3)  |
| Tuvalu                     | 21 (15.5 to 28.6)      | 22.9 (16.7 to 31.1)    | 0.1 (0 to 0.2)      | 3.9 (2.4 to 5.6)   | 3.5 (2.1 to 4.8)   | -0.1 (-0.4 to 0.3)  | 117.1 (67.3 to 180.5)  | 99.4 (60.2 to 142)     | -0.2 (-0.4 to 0.3)  |
| Uganda                     | 176.5 (107.7 to 259.7) | 172.7 (105.7 to 253.3) | 0 (-0.1 to 0.1)     | 4.1 (2.7 to 5.3)   | 3.5 (2.2 to 4.7)   | -0.1 (-0.4 to 0.2)  | 143.8 (96.6 to 187)    | 125 (76.8 to 172.8)    | -0.1 (-0.4 to 0.2)  |

|                                    |                        |                        |                     |                   |                     |                     |                        |                        |                     |
|------------------------------------|------------------------|------------------------|---------------------|-------------------|---------------------|---------------------|------------------------|------------------------|---------------------|
| Ukraine                            | 23.7 (18.5 to 30.5)    | 21.7 (16.7 to 27.9)    | -0.1 (-0.2 to 0)    | 4.8 (3.5 to 6.6)  | 7.6 (5.7 to 9.5)    | 0.6 (0.1 to 1.3)    | 122.7 (91.1 to 185.2)  | 211.9 (162.8 to 291.7) | 0.7 (0.2 to 1.4)    |
| United Arab Emirates               | 18.9 (14.5 to 24.8)    | 18.9 (14.2 to 24.7)    | 0 (-0.1 to 0.1)     | 2.4 (1.3 to 4.8)  | 1.6 (0.8 to 3.2)    | -0.4 (-0.5 to -0.1) | 68.8 (39.5 to 128.2)   | 42.2 (23 to 82.4)      | -0.4 (-0.6 to -0.1) |
| United Kingdom                     | 40.4 (31.6 to 50.7)    | 33.5 (27.2 to 40.8)    | -0.2 (-0.2 to -0.1) | 2.6 (2.1 to 4.8)  | 2.4 (2.1 to 3.4)    | -0.1 (-0.4 to 0.1)  | 72.6 (62.7 to 95.3)    | 51.8 (47.6 to 61.3)    | -0.3 (-0.4 to -0.2) |
| United Republic of Tanzania        | 257.7 (168.9 to 355.4) | 286 (186.1 to 397.4)   | 0.1 (0 to 0.2)      | 5.1 (3.5 to 6.4)  | 4.2 (2.6 to 5.8)    | -0.2 (-0.4 to 0.1)  | 191.3 (132.2 to 244.8) | 159.7 (103.2 to 236.3) | -0.2 (-0.4 to 0.2)  |
| United States of America           | 153.6 (120.2 to 196.8) | 157.1 (126.1 to 193.6) | 0 (-0.1 to 0.1)     | 6.2 (4.8 to 6.7)  | 4.9 (4.4 to 5.4)    | -0.2 (-0.3 to 0)    | 170.9 (133 to 184.9)   | 125.3 (114.4 to 140.7) | -0.3 (-0.3 to -0.1) |
| United States Virgin Islands       | 39.6 (30.5 to 51.5)    | 37.4 (28.4 to 49.1)    | -0.1 (-0.1 to 0)    | 7.1 (5.6 to 9.3)  | 7 (5.1 to 8.7)      | 0 (-0.3 to 0.3)     | 181.5 (143.3 to 234.9) | 159.2 (113.7 to 206.1) | -0.1 (-0.4 to 0.2)  |
| Uruguay                            | 115.9 (82.2 to 158.3)  | 91.2 (66 to 123.1)     | -0.2 (-0.3 to -0.1) | 9.5 (6.2 to 11)   | 4.7 (3.9 to 6.6)    | -0.5 (-0.6 to -0.1) | 214.9 (146.2 to 245.3) | 101.9 (88.1 to 142)    | -0.5 (-0.6 to -0.1) |
| Uzbekistan                         | 2 (1.5 to 2.6)         | 2.1 (1.6 to 2.8)       | 0.1 (0 to 0.2)      | 0.6 (0.3 to 1.3)  | 1.3 (1 to 1.7)      | 1.1 (0.2 to 3.5)    | 19.2 (10.8 to 39.4)    | 43 (33 to 53.5)        | 1.2 (0.1 to 2.9)    |
| Vanuatu                            | 21.7 (15.9 to 29.6)    | 20.5 (15.1 to 27.6)    | -0.1 (-0.2 to 0.1)  | 3.2 (2 to 4.6)    | 3.5 (2 to 5.1)      | 0.1 (-0.2 to 0.5)   | 88.6 (53 to 136.5)     | 102.9 (56.8 to 155.2)  | 0.2 (-0.2 to 0.6)   |
| Venezuela (Bolivarian Republic of) | 17.6 (12.2 to 24.6)    | 16.3 (11.4 to 22.9)    | -0.1 (-0.2 to 0.1)  | 4.2 (1.8 to 5.2)  | 2.7 (1.8 to 3.5)    | -0.4 (-0.5 to 0.2)  | 86.9 (47.9 to 103.9)   | 53.8 (40.4 to 69.3)    | -0.4 (-0.6 to 0.1)  |
| Viet Nam                           | 42.4 (31.6 to 54.7)    | 49.2 (38.4 to 63.3)    | 0.2 (0 to 0.4)      | 4.2 (3 to 6.2)    | 3.9 (2.9 to 5.2)    | -0.1 (-0.3 to 0.3)  | 93.6 (69 to 150.3)     | 82.6 (60.5 to 122.5)   | -0.1 (-0.3 to 0.2)  |
| Yemen                              | 11.8 (8.8 to 15.7)     | 13 (9.6 to 17.2)       | 0.1 (0 to 0.2)      | 2.8 (1.5 to 5.2)  | 2.3 (1.4 to 4)      | -0.2 (-0.4 to 0.2)  | 76.1 (38.7 to 170)     | 60.4 (36.2 to 112)     | -0.2 (-0.5 to 0.3)  |
| Zambia                             | 242 (153.2 to 343.9)   | 257.4 (168.2 to 367.1) | 0.1 (-0.1 to 0.2)   | 3.9 (2.3 to 5.3)  | 4.7 (2.8 to 6.5)    | 0.2 (-0.1 to 0.7)   | 152.2 (92.9 to 207.4)  | 160.1 (100.9 to 222.4) | 0.1 (-0.3 to 0.5)   |
| Zimbabwe                           | 227.2 (158.7 to 310.6) | 226.7 (148 to 327.7)   | 0 (-0.2 to 0.2)     | 14.8 (11 to 17.8) | 15.1 (10.9 to 19.3) | 0 (-0.2 to 0.3)     | 327.9 (239.7 to 392.2) | 347.5 (248.2 to 443.4) | 0.1 (-0.2 to 0.4)   |

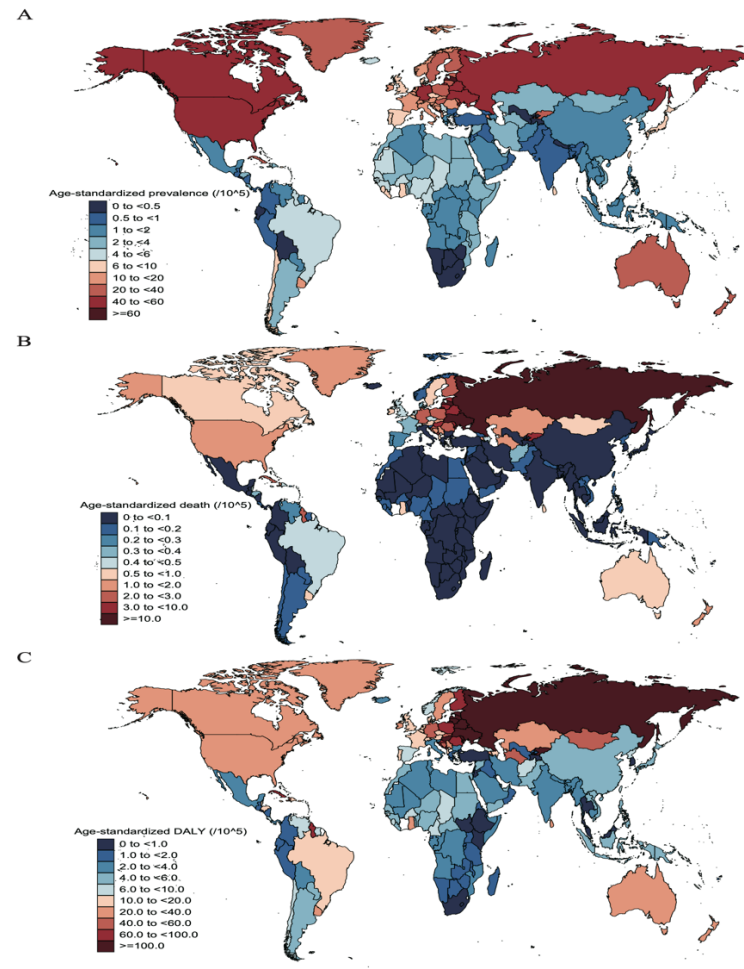

Figure S1. Age-standardized prevalence rates (A), death (B), and DALY (C) of alcoholic cardiomyopathy for 204 countries and territories, both sexes, 2019. DALY: Disability-Adjusted Life Year.

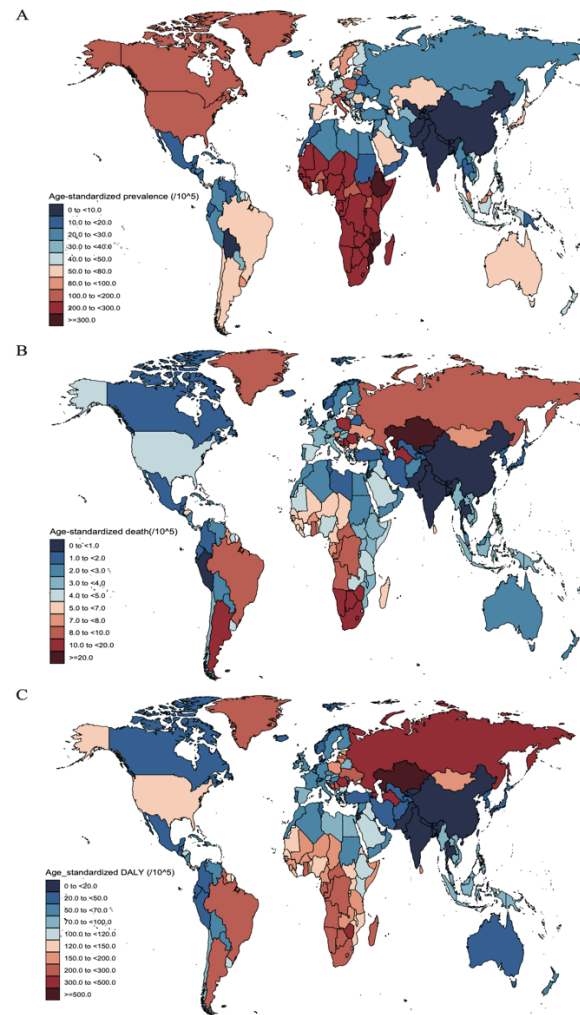

Figure S2. Age-standardized prevalence rates (A), death (B), and DALY (C) of other cardiomyopathy for 204 countries and territories, both sexes, 2019. DALY: Disability-Adjusted Life Year.

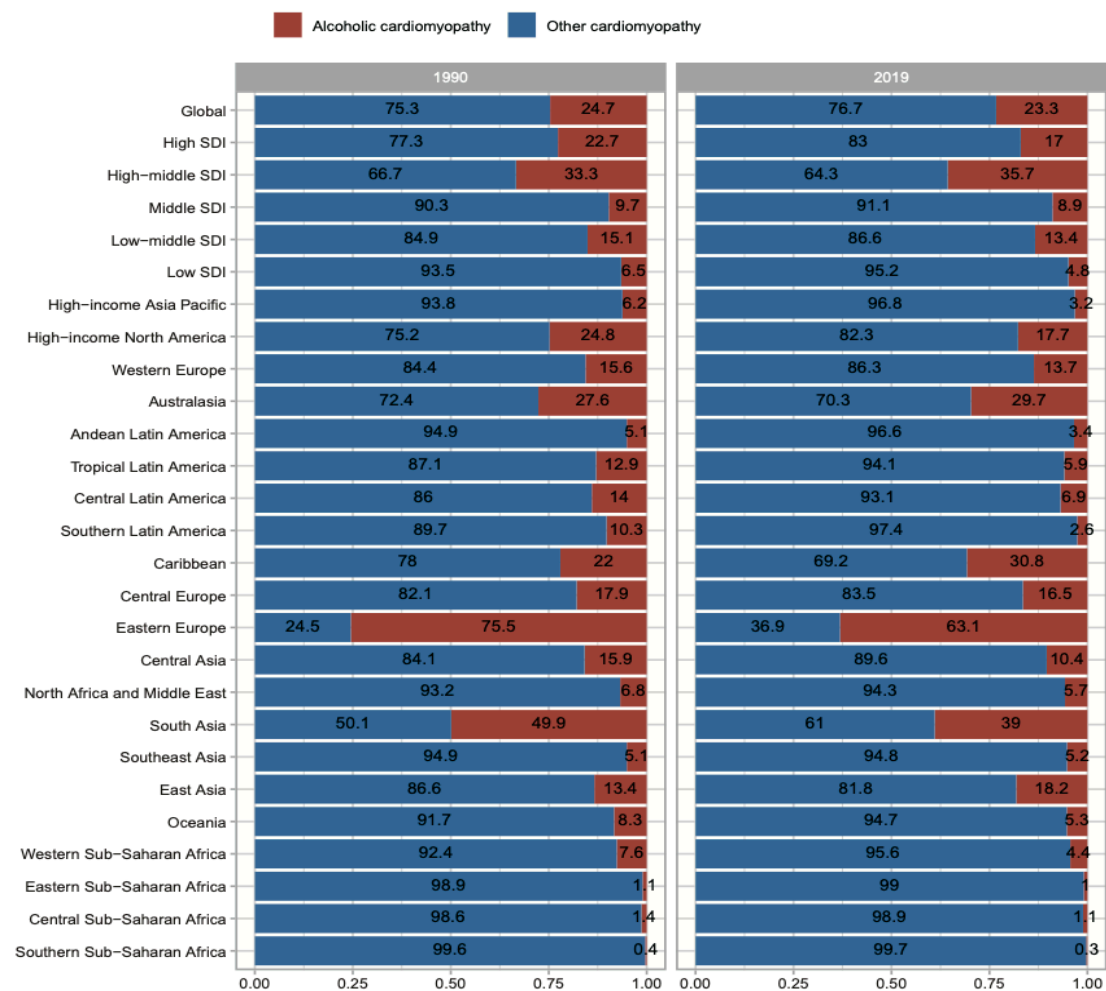

Figure S3. Contribution of alcoholic cardiomyopathy, and other causes to cardiomyopathy deaths, both sexes, globally and by region, in 1990 and 2019.

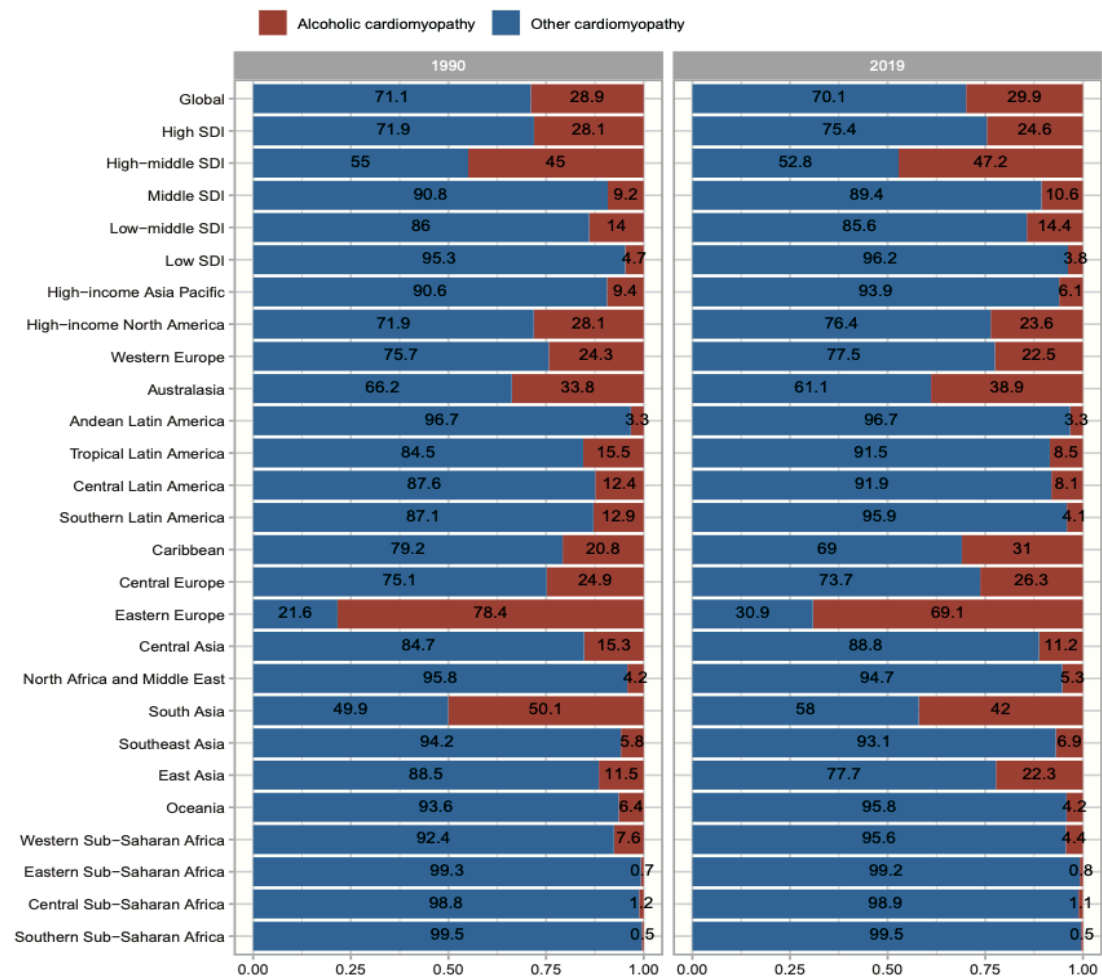

Figure S4. Contribution of alcoholic cardiomyopathy, and other causes to cardiomyopathy DALYs, both sexes, globally and by region, in 1990 and 2019. DALY: Disability-Adjusted Life Year.

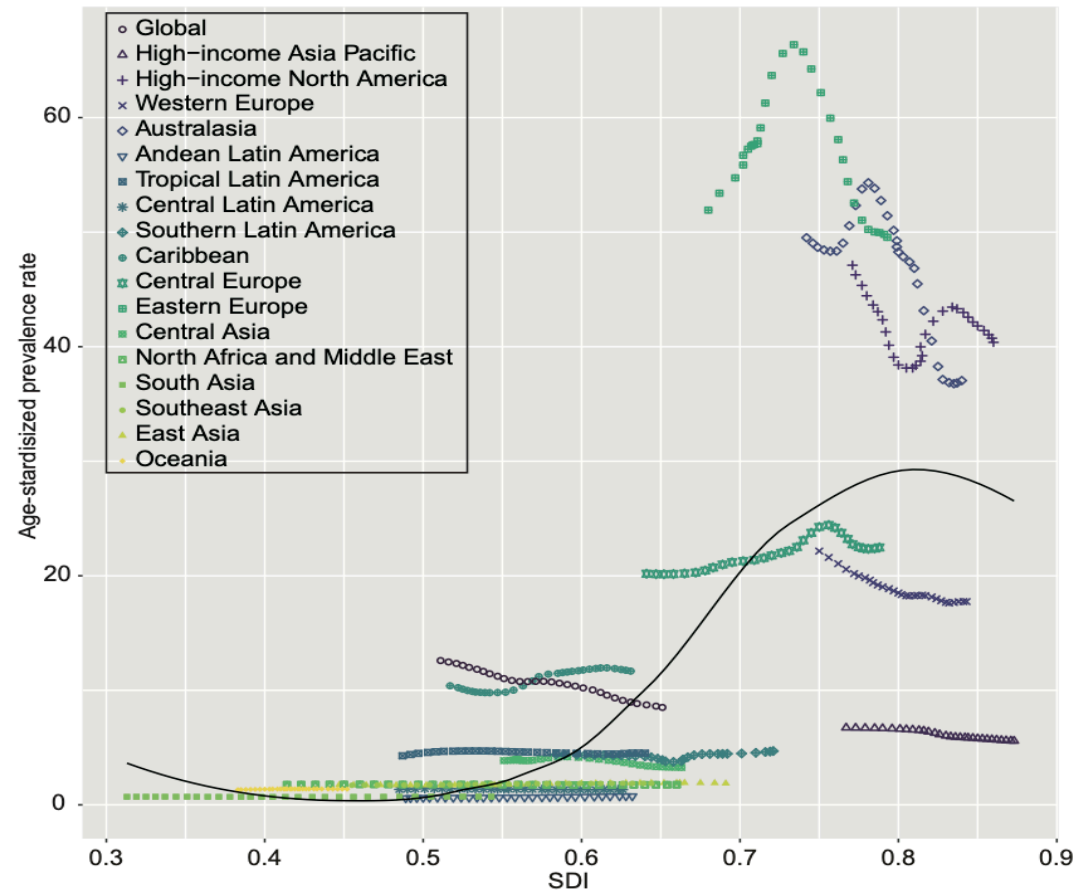

Figure S5. Temporal trends in age-standardized death rates of alcoholic cardiomyopathy for 21 world regions by SDI, both sexes, 1990–2019. For each region, points from left to right depict estimates from each year from 1990 to 2019. SDI, Socio-demographic Index.



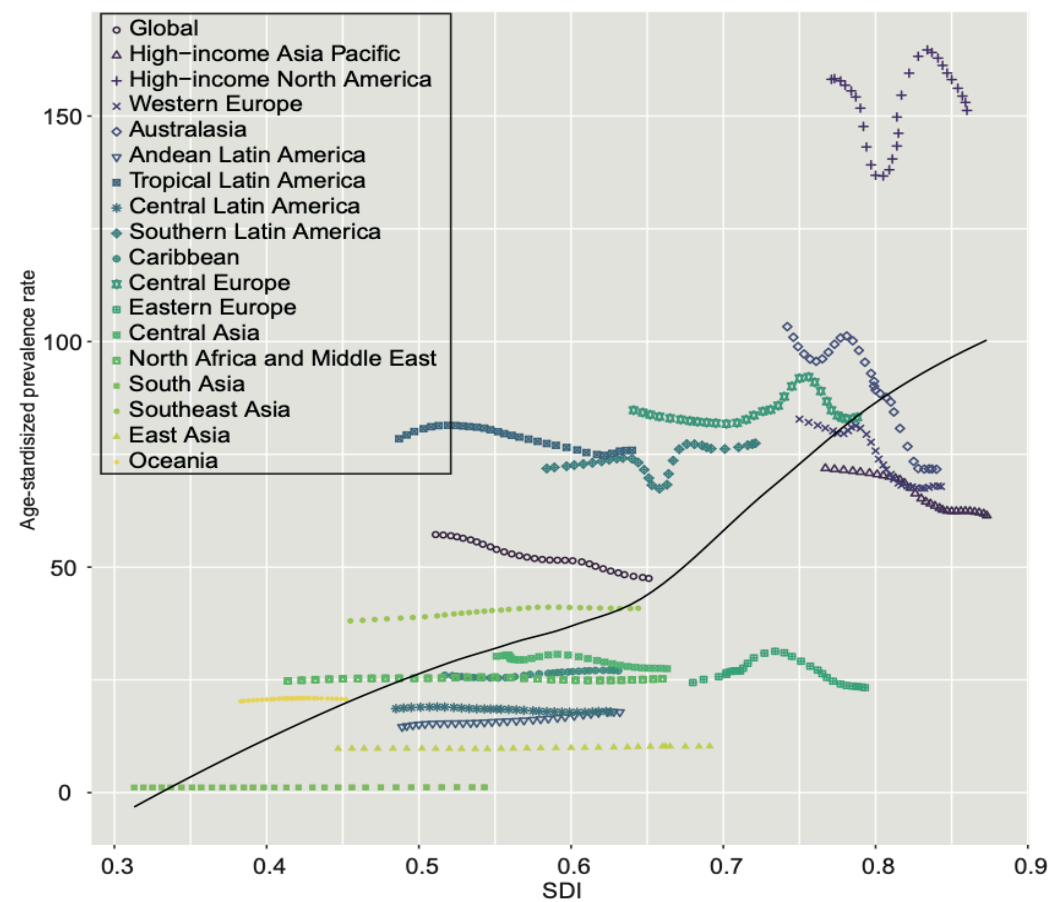

Figure S6. Temporal trends in age-standardized death rates of other cardiomyopathy for 21 world regions by SDI, both sexes, 1990–2019. For each region, points from left to right depict estimates from each year from 1990 to 2019. SDI, Socio-demographic Index.
